# Supplementary material for: Analysis of endogenous metabolites using multifunctional derivatization and capillary RPLC-MS
Source: Royal Society of Chemistry journal article supplement (doi:10.1039/d2ay01108e), 2022-01-01

Supporting Information Analytical Methods

**Multifunctional Derivatization of Endogenous Metabolites using Capillary RPLC-MS**

Julius Agongo,<sup>\*a</sup> Michael Armbruster<sup>b</sup>, Christopher Arnatt<sup>c</sup> and James Edwards<sup>d</sup>

Department of Chemistry and Biochemistry, Saint Louis  
University,  
3501 Laclede Ave, St Louis, MO, 63103, USA

Contents

|                                                                                                                                |        |
|--------------------------------------------------------------------------------------------------------------------------------|--------|
| Figure S-1: Reconstructed Ion Chromatogram for 250 derivatized Metabolites standards.....                                      | S1-S2  |
| Figure S-2: Reconstructed Ion Chromatogram for 107 derivatized Metabolite targeted in Bovine aortic endothelia cells (BAECs).. | S2-S3  |
| Figure S-3: Reconstructed Ion Chromatogram for 107 derivatized Metabolite targeted in human urine.....                         | S3-S4  |
| Figure S-4: Reconstructed Ion Chromatogram for 107 derivatized Metabolite targeted in human serum.....                         | S4-S5  |
| Figure S-5-27: Reconstructed Fragmentation spectra (MS/MS) for 250 derivatized Metabolites standards.....                      | S5-S27 |
| Table S-1: Metabolite standards (250) derivatized and analyzed .....                                                           | 1-2    |
| Table S-2: Metabolite standards m/z(M-H) untagged and m/z(M+H) derivatized .....                                               | 2-3    |
| Table S-3: Targeted Metabolites analysis in BAECs, human urine and human serum .....                                           | 3-4    |
| Table S-4: Comparison of Peak width at half height (second) for capLC-ESI-MS and CE-ESI-MS.....                                | 4-5    |





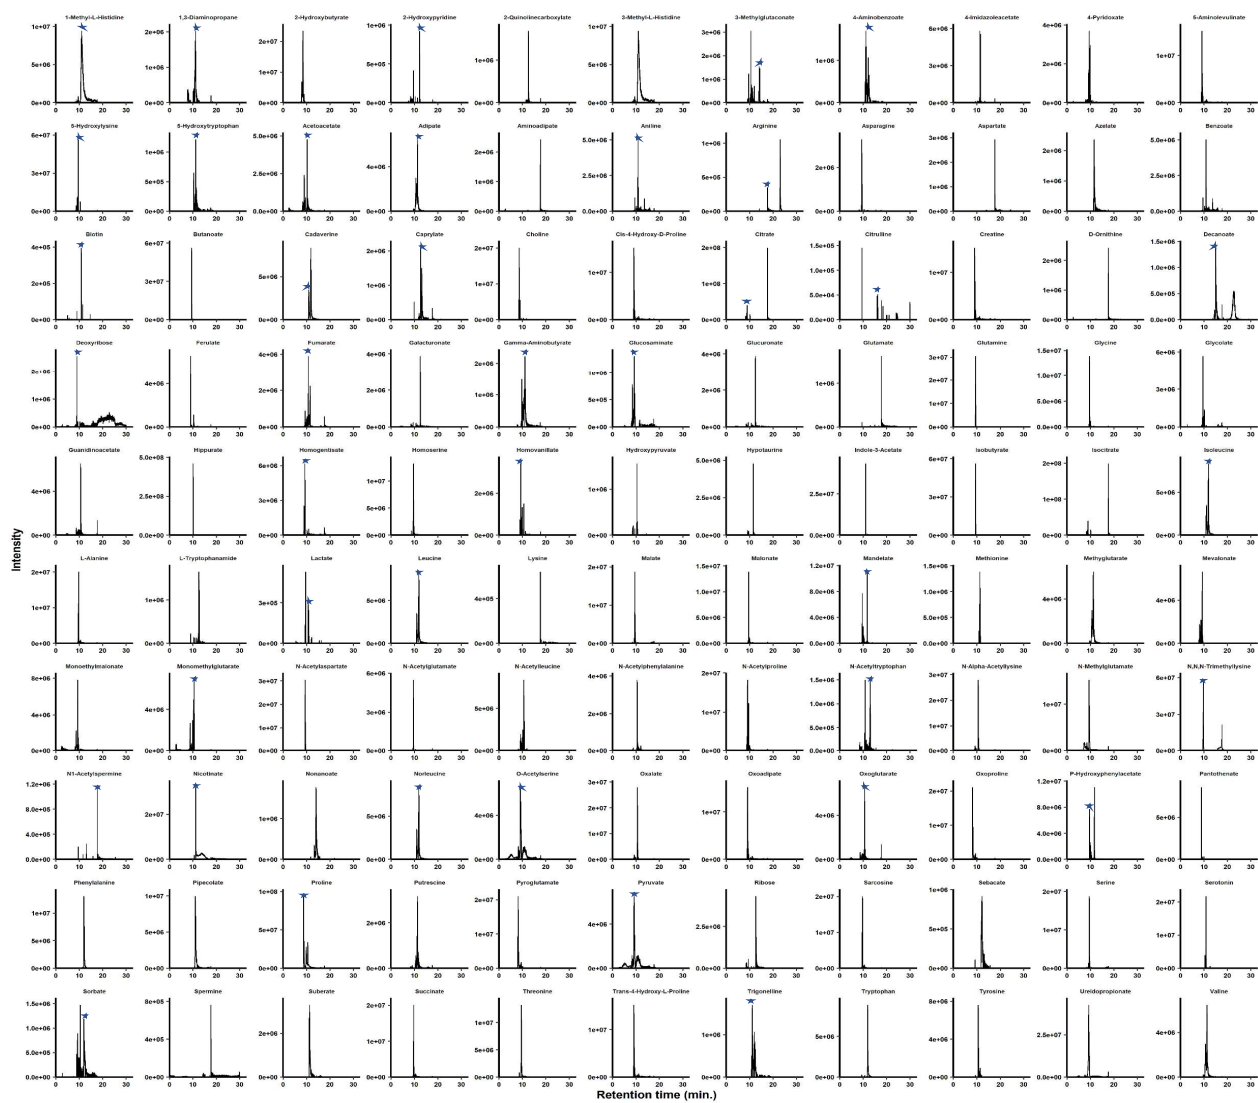

Supplementary Figure 3. Reconstructed Ion Chromatogram for 111 derivatized metabolite targeted in human urine

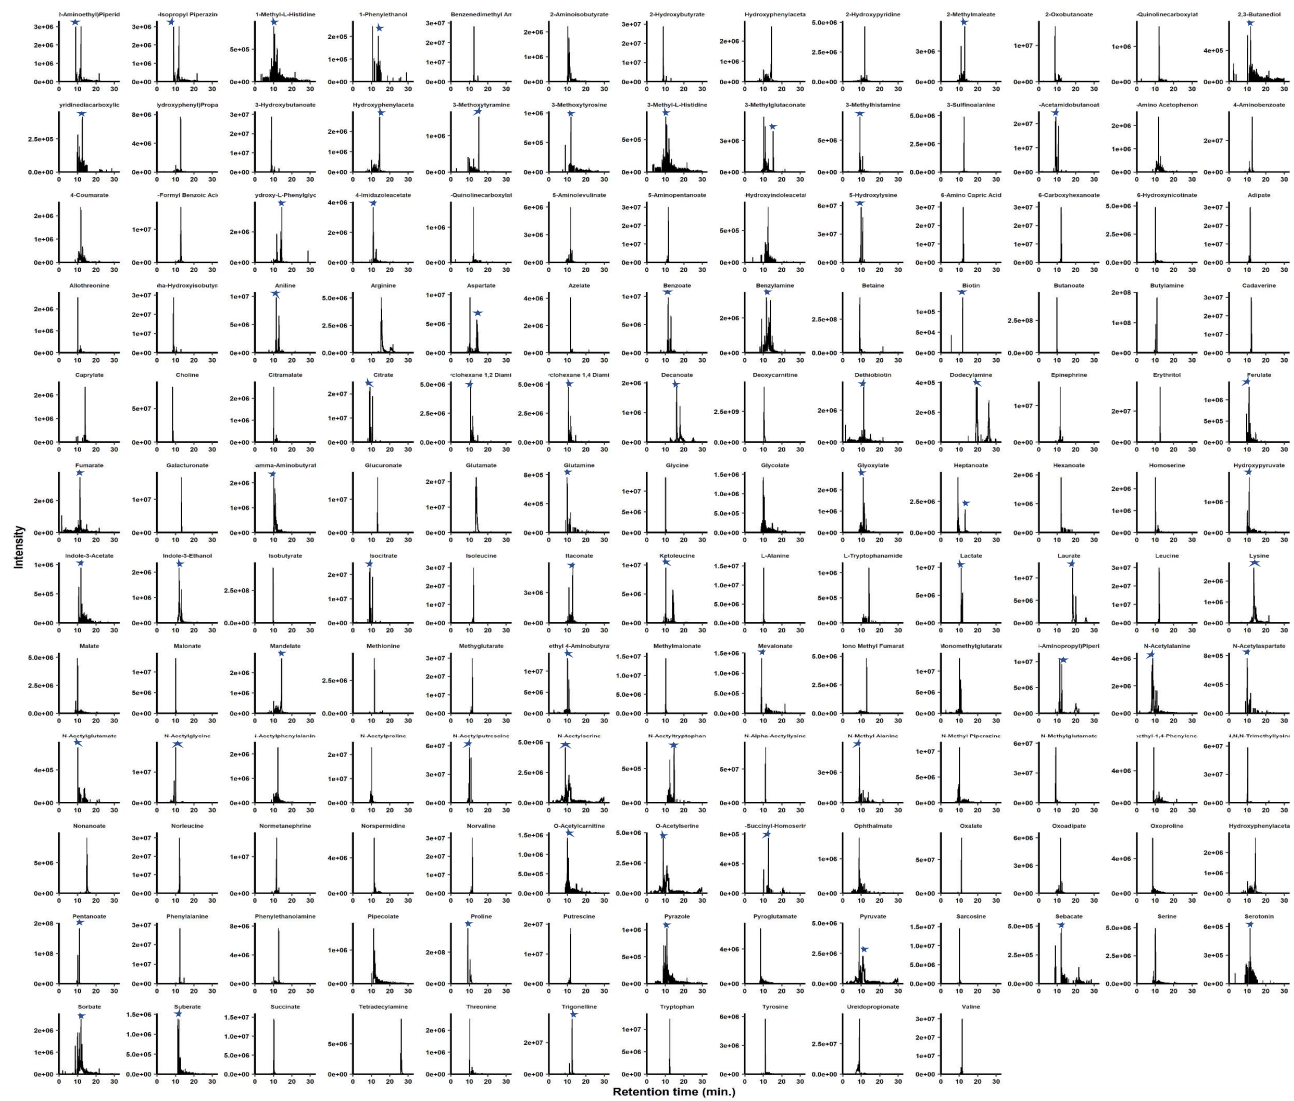

Supplementary Figure 4. Reconstructed Ion Chromatogram for 153 tagged metabolite targeted in human serum .

Supplementary Figure 5. MS/MS spectra for 250 derivatized metabolite standards

1. 6-HYDROXYNICOTINATE

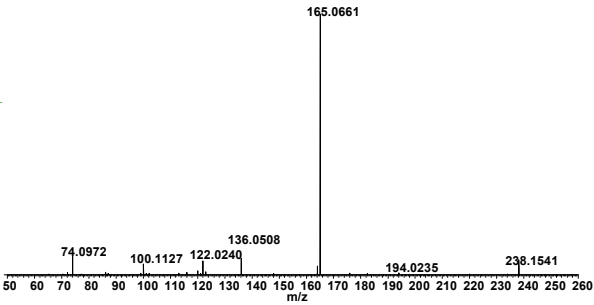

2. PYROGLUTAMATE/OXOPROLINE

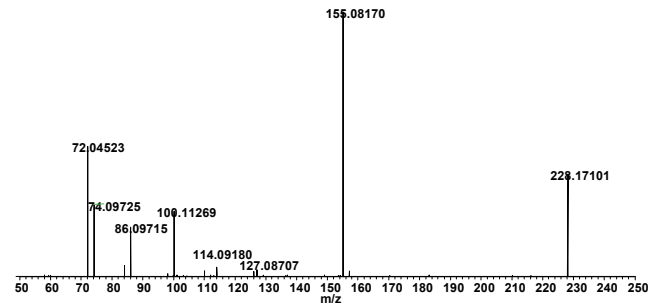

4. RIBITOL/XYLITOL

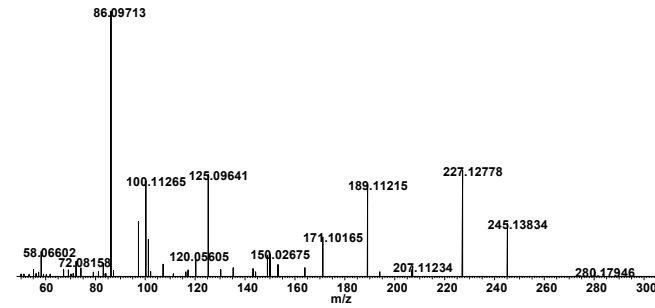

6. MEVALONATE

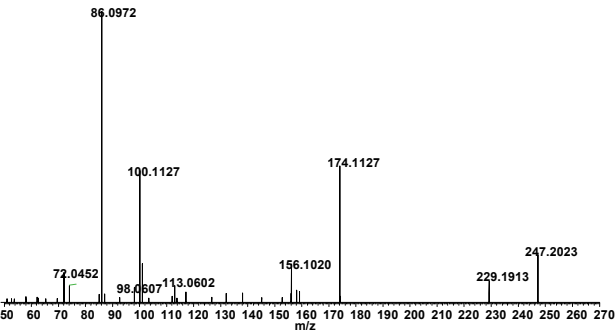

7. CHOLINE

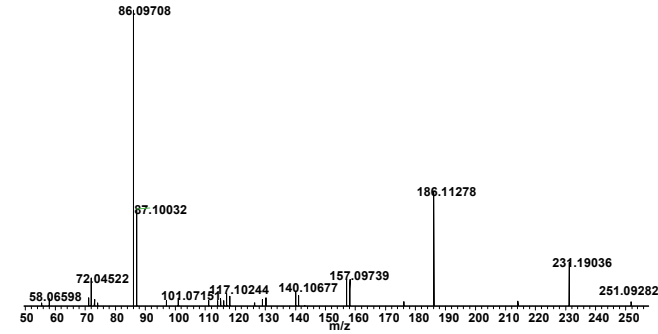

8. GUANIDINOACETATE

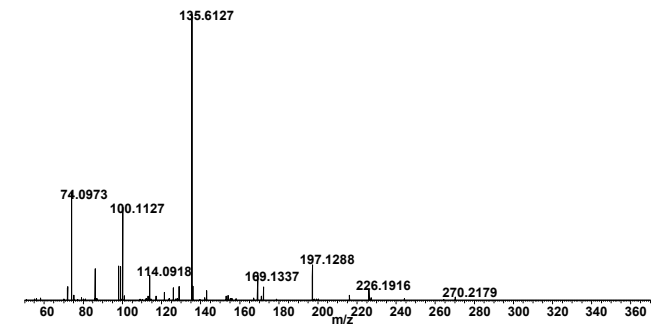

9. PYRIDOXAL

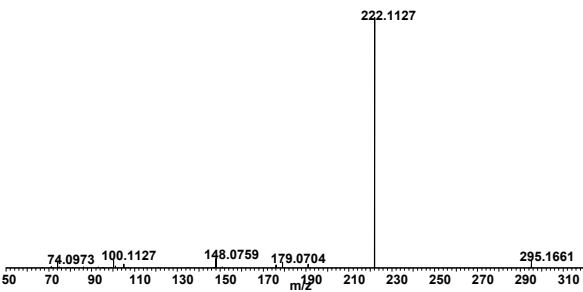

10. HYDROXYKYNURENINE

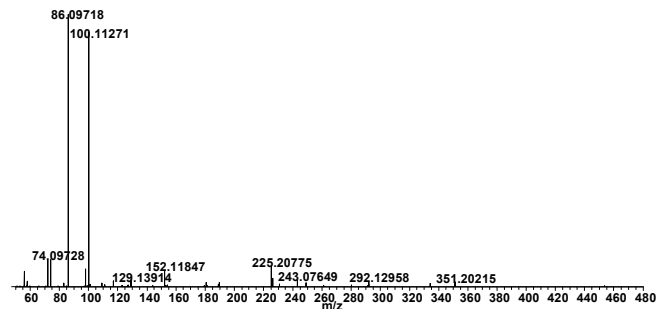

11. PROLINE

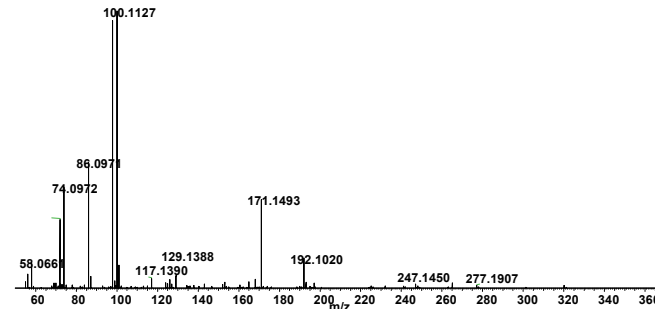

Supplementary Figure 6. MS/MS spectra for 250 derivatized metabolite standards

12. 2/3/ALPHA-HYDROXYISOBUTYRATE

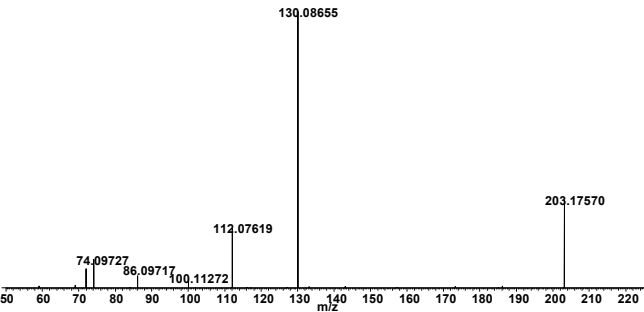

15. PANTOTHENATE

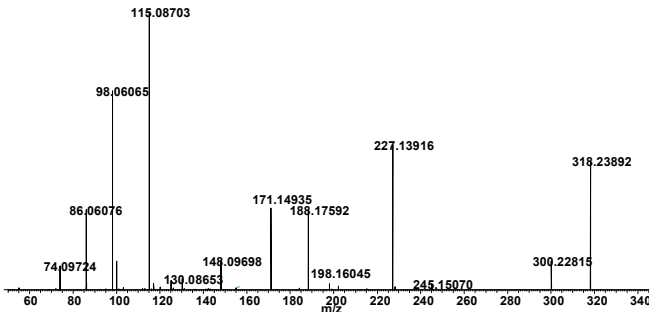

16. GLUCOSAMINATE

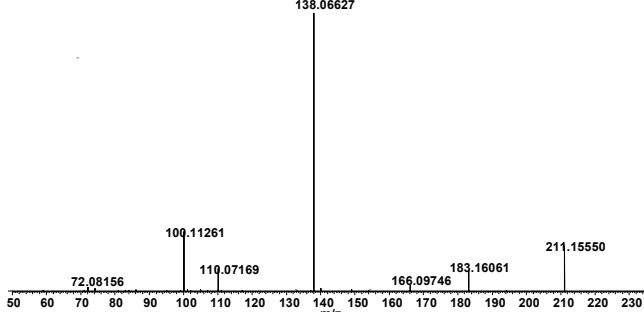

17. 2-OXOBUTANOATE

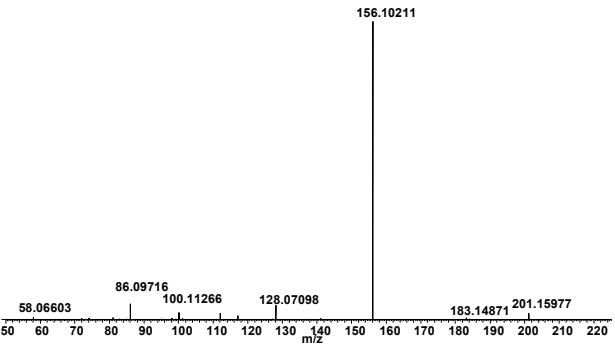

18. CITRATE/ISOCITRATE/4-ACETAMIDOBUTANOATE

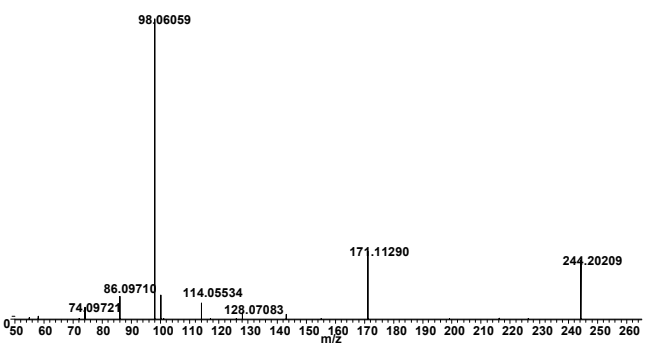

20. UROCANATE

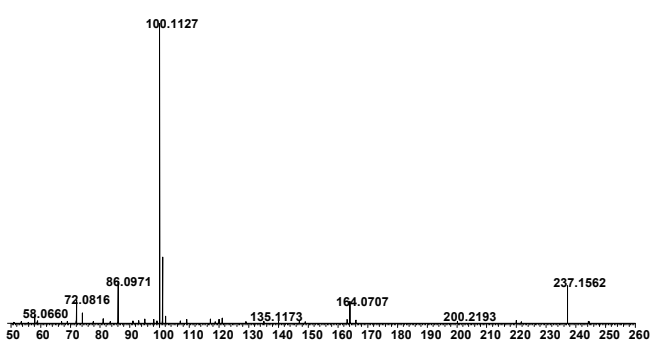

22. N-FORMYLGLYCINE

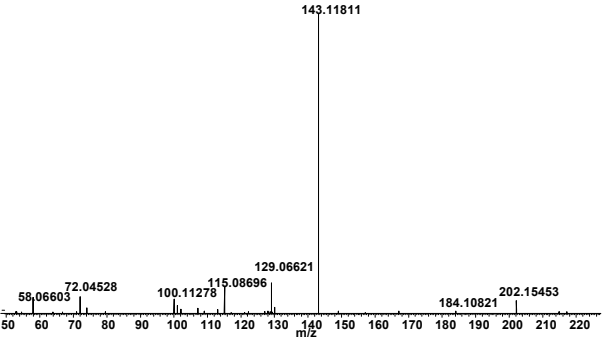

23. N-ACETYLALANINE

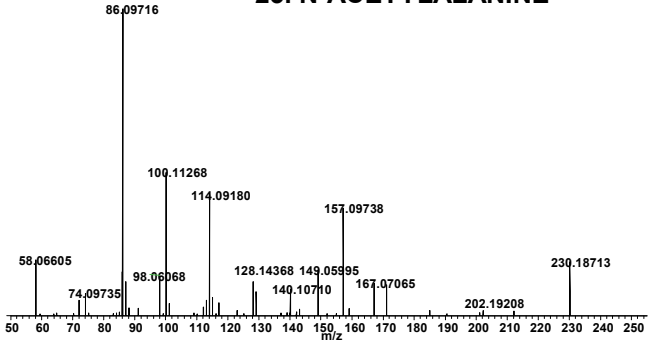

24. N-METHYL PIPERAZINE

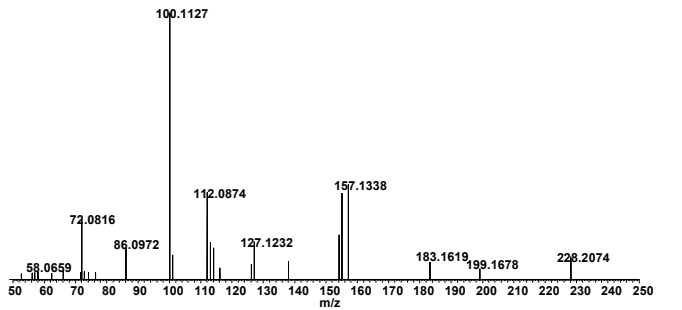

Supplementary Figure 7. MS/MS spectra for 250 derivatized metabolite standards

25. RIBOSE

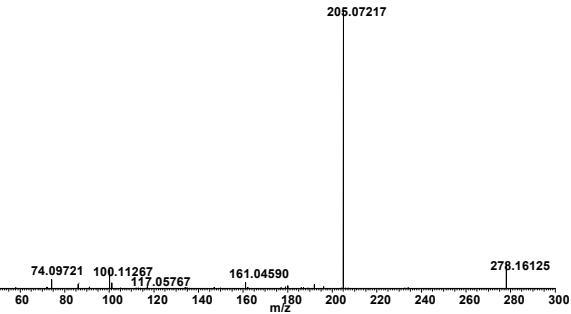

26. PHENOL

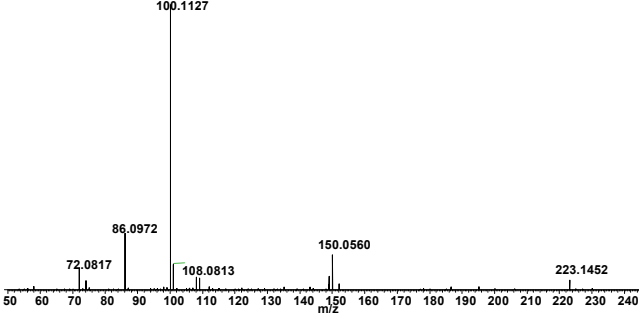

27. 3-METHYLHISTAMINE

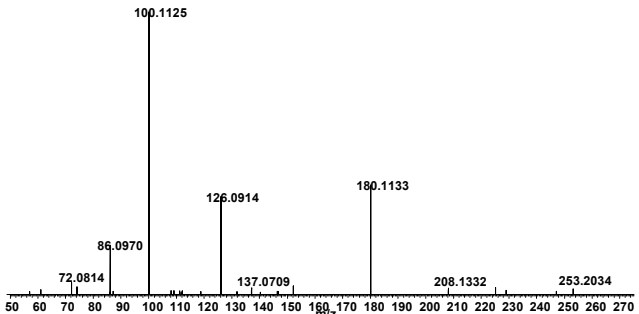

28. GLYCINE/ MALONATE

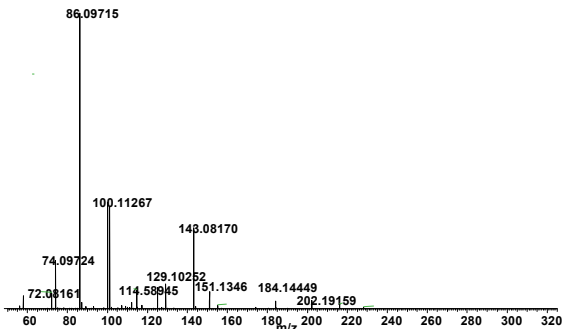

30. CREATINE

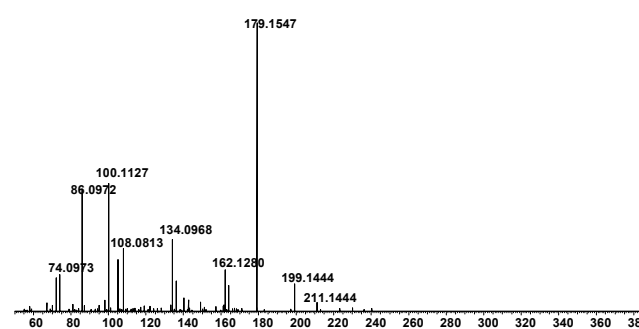

31. L-ALANINE/SARCOSINE

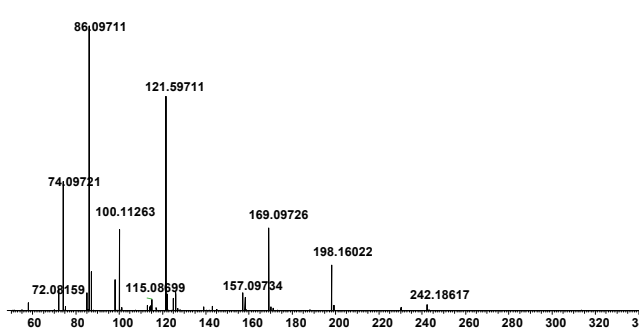

33. PYRUVATE

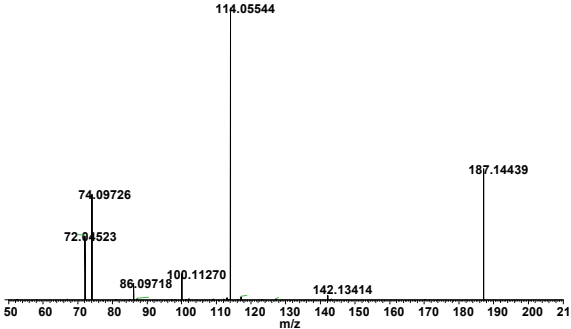

34. N-ACETYLPROLINE

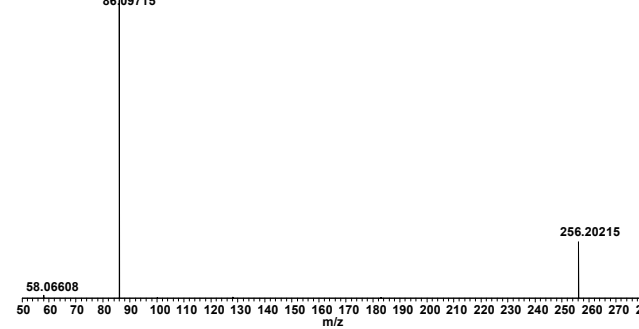

35. N-METHYL ALANINE

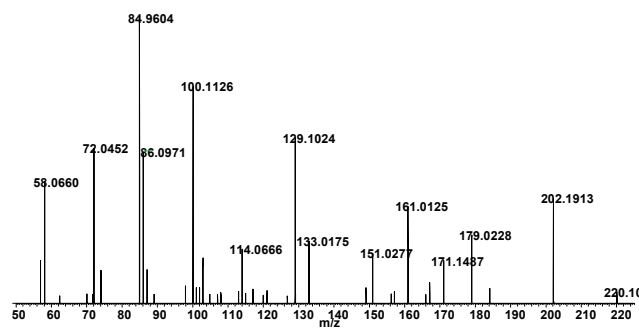



Supplementary Figure 8. MS/MS spectra for 250 derivatized metabolite standards

36. UREIDOPROPIONATE

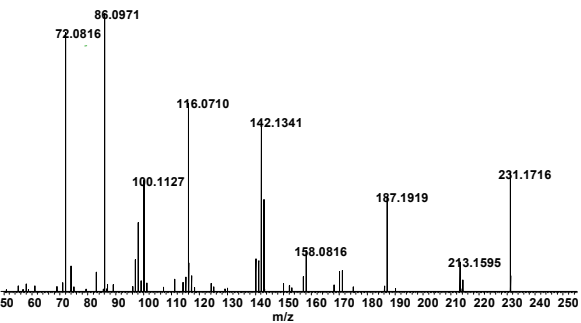

37. N-METHYLGLUTAMATE

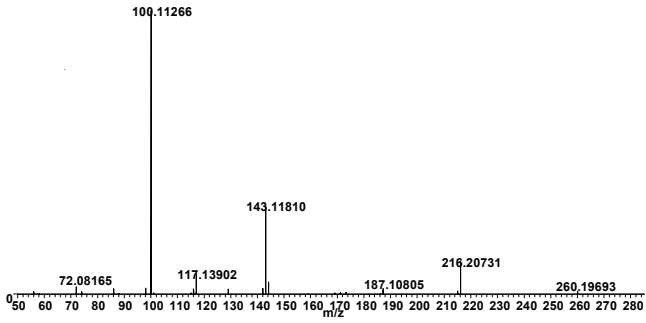

38. 3-AMINO-5-HYDROXYBENZOATE

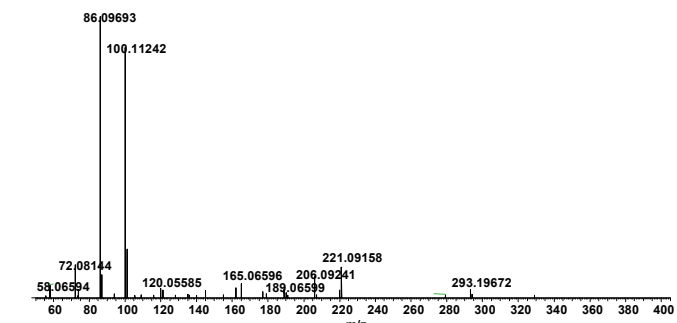

39. CIS/TRANS-4-HYDROXY-L-PROLINE

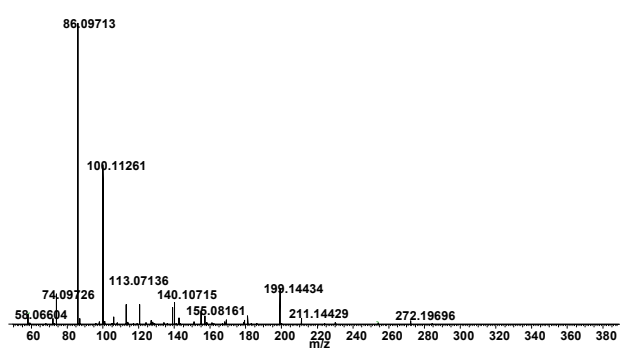

41. BETAINE

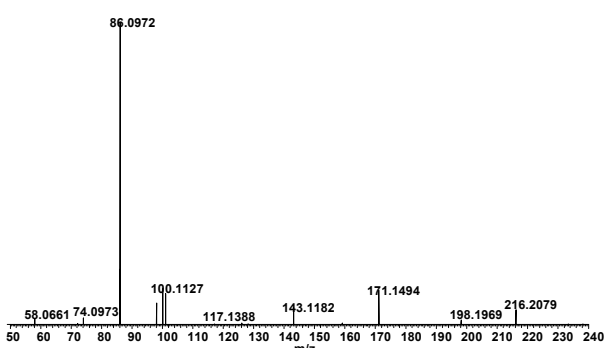

42. N,N-DIMETHYL-1,4-PHENYLENEDIAMINE

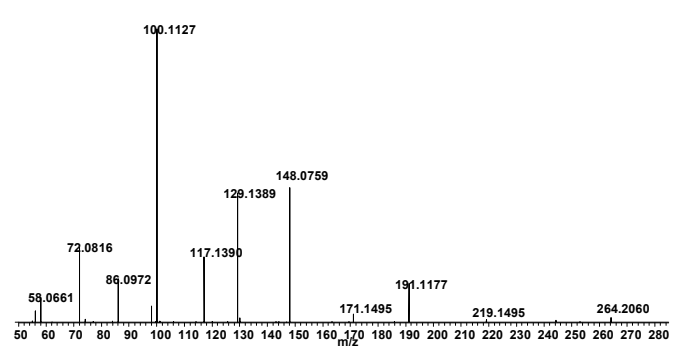

43. HISTIDINOL

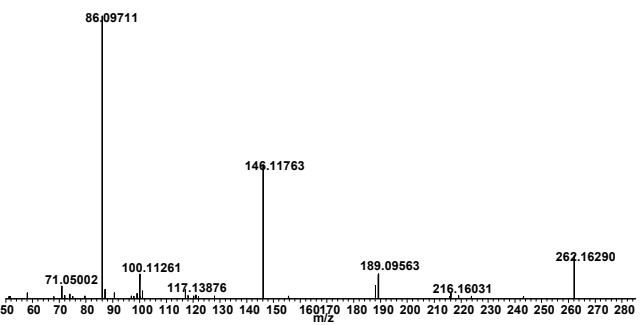

44. DEOXYRIBOSE

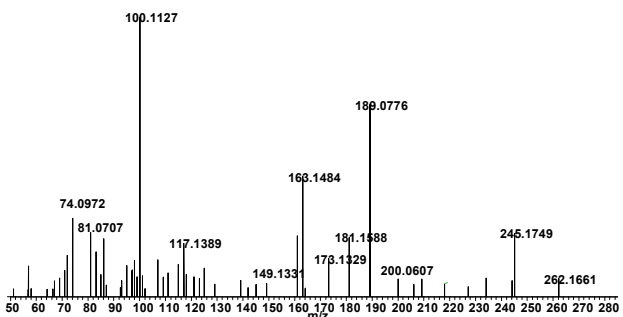

45. OPHTHALMATE

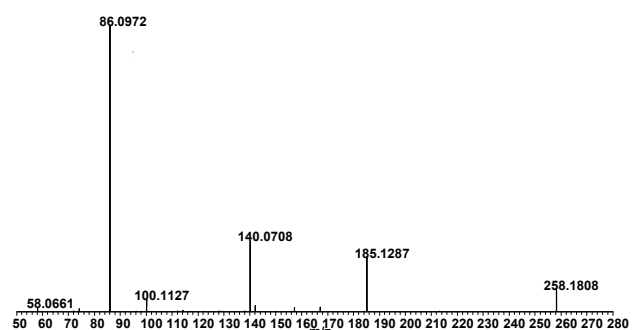

Supplementary Figure 9. MS/MS spectra for 250 derivatized metabolite standards

46. OXOGLUTARATE

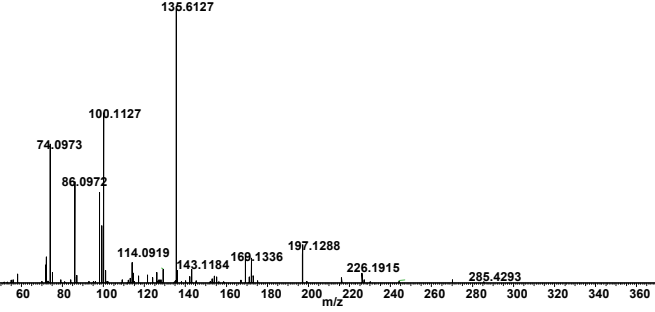

47. ASPARAGINE/GLY-GLY

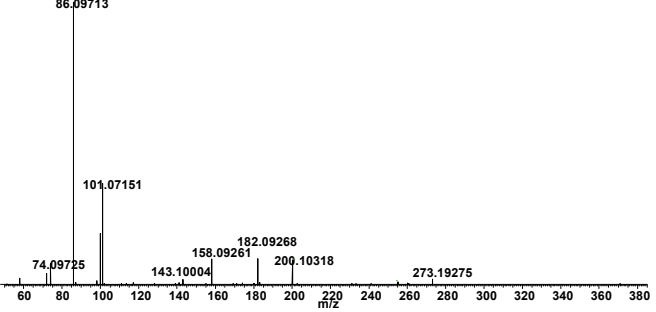

49. MONOETHYLMALONATE

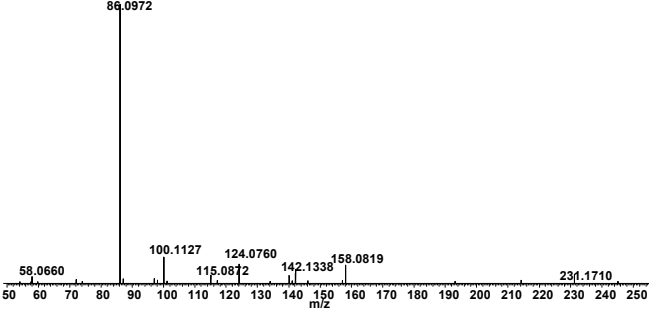

50. SERINE/MALATE

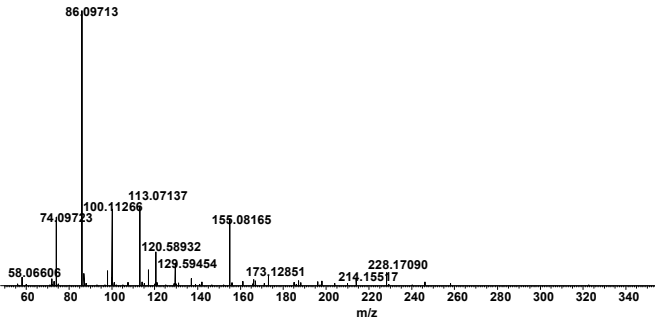

52. N-ACETYLPUTRESCINE/ 5-HYDROXYLYSINE

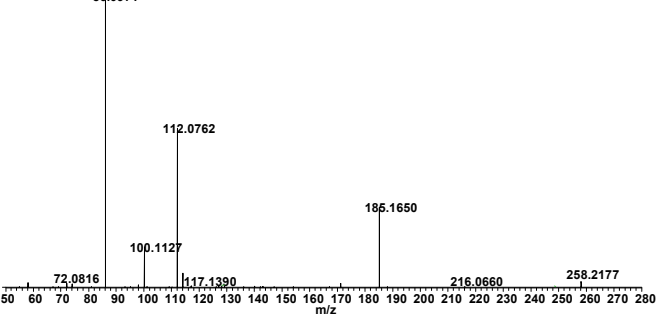

54. GLUTAMINE/N-ACETYLASPARTATE

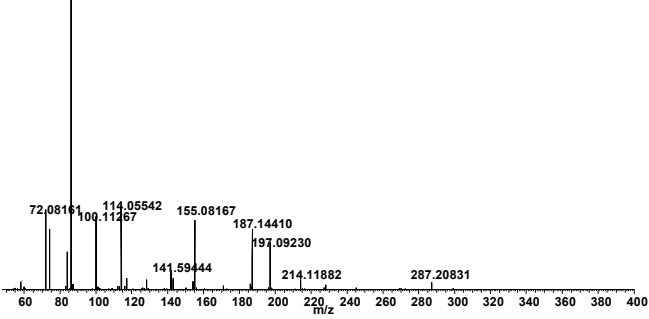

56. ISOBUTYRATE/BUTANOATE

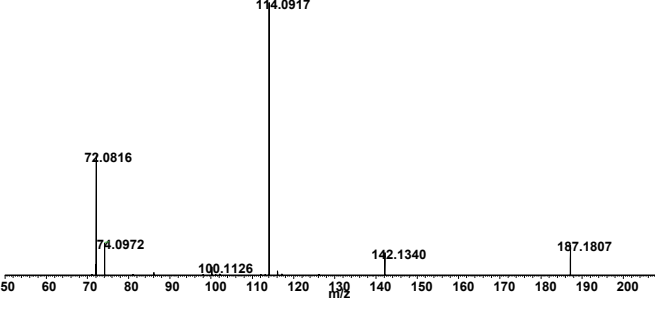

58. THREONINE/ALLOTHREONINE/HOMOSERINE

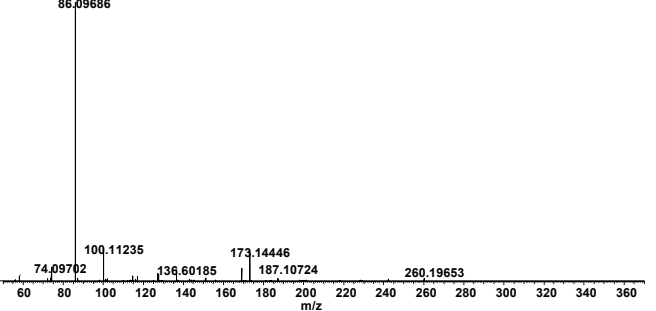

61. SUCCINATE

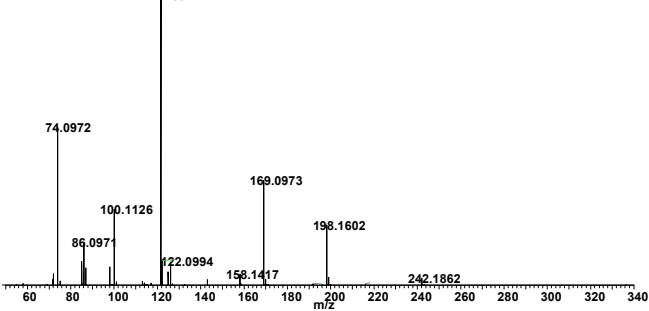

Supplementary Figure 10. MS/MS spectra for 250 derivatized metabolite standards

62. N-ACETYLGLYCINE

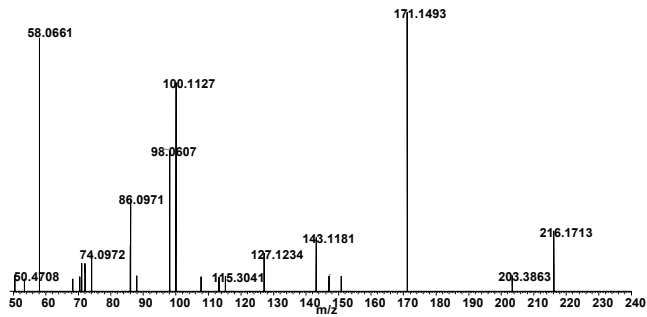

63. HOMO VANILLATE/ HYDROXYPHENYLACTATE

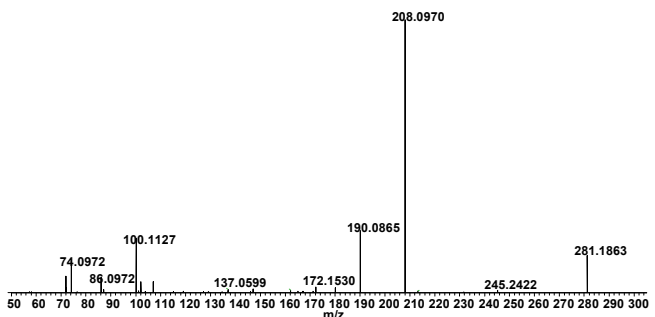

65. N,N,N-TRIMETHYLLYSINE

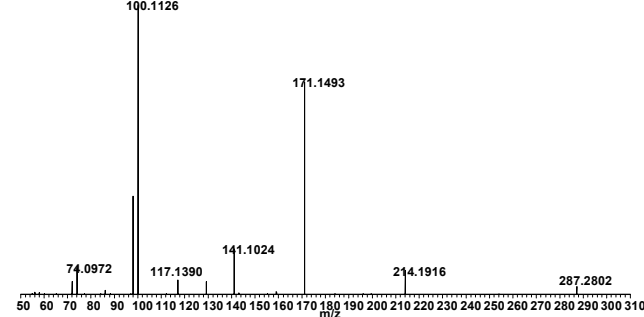

66. BIOTIN

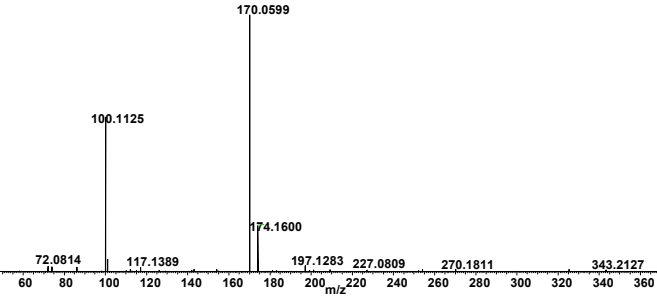

67. 2-HYDROXYPYRIDINE

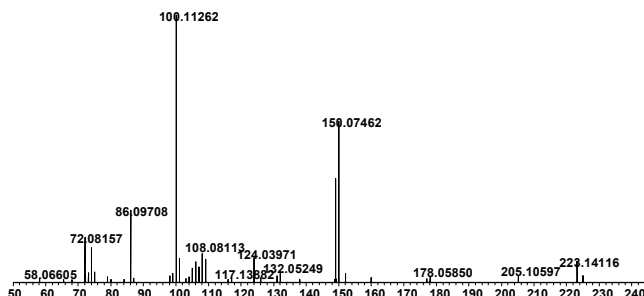

68. 1/3-METHYL-L-HISTIDINE

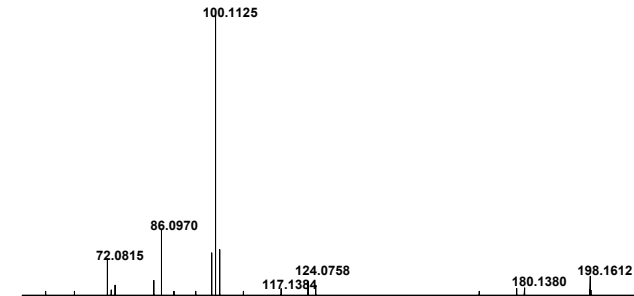

70. GLUTARATE/ETHYLMALONATE

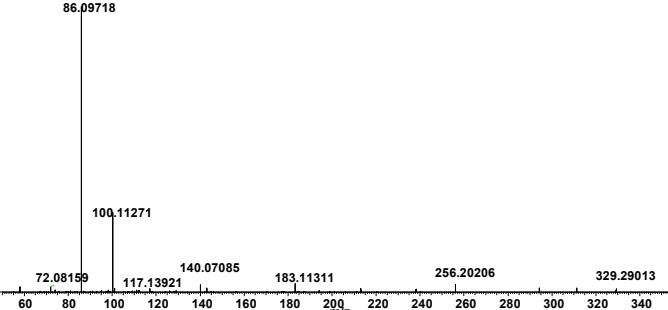

72. GLYCOLATE

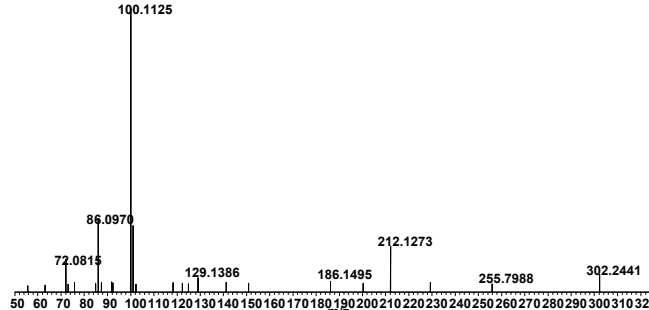

73. 1-ISOPROPYL PIPERAZINE

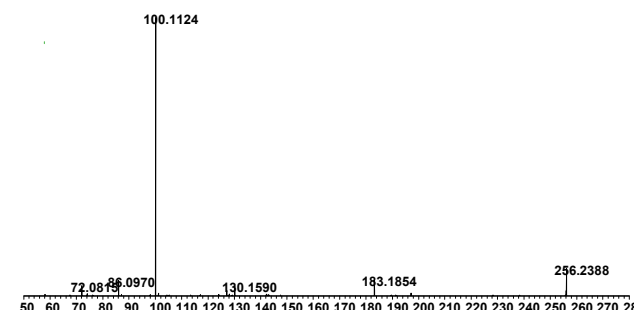

Supplementary Figure 11. MS/MS spectra for 250 derivatized metabolite standards

74. BUTYLAMINE/ PENTANOATE

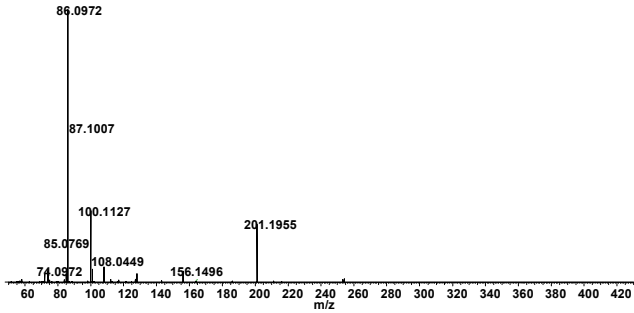

76. DETHIOBIOTIN/MALEATE

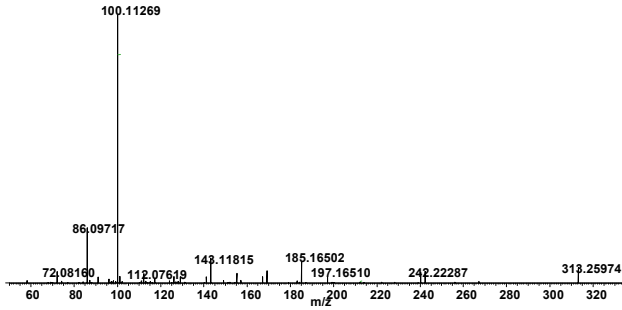

78. O-ACETYLCARNITINE

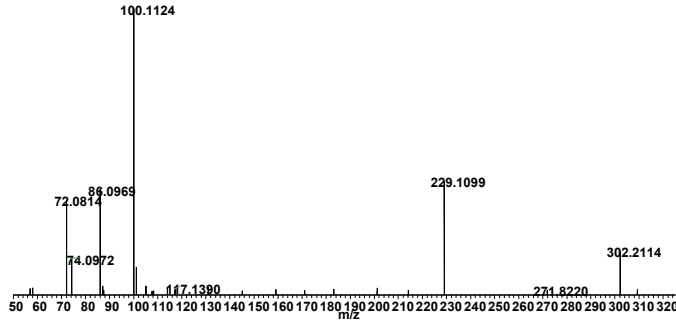

79. HIPPURATE

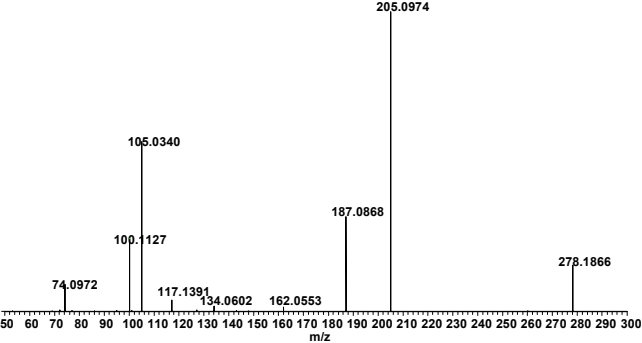

80. SORBITOL/ GALACTITOL

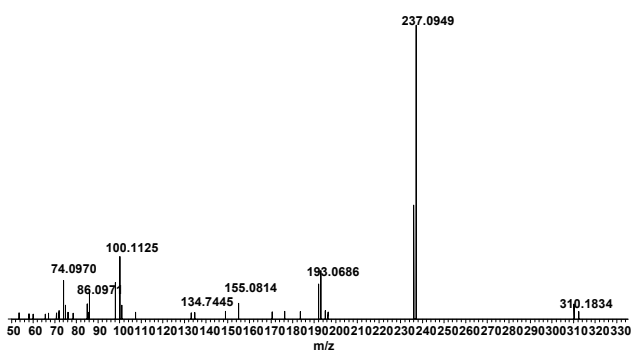

82. 1,3-DIAMINOPROPANE/AMINOISOBUTANOATE

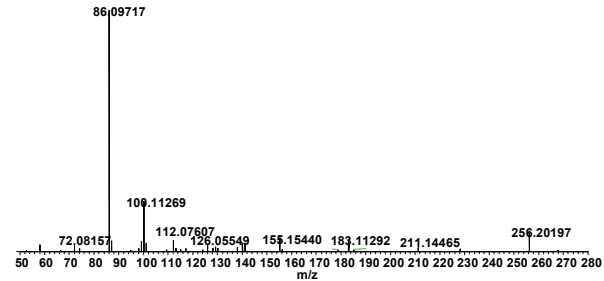

84. N-ACETYSERINE/ O-ACETYSERINE

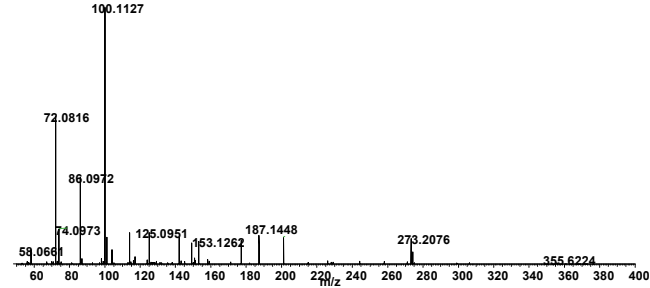

86. GLYOXYLATE

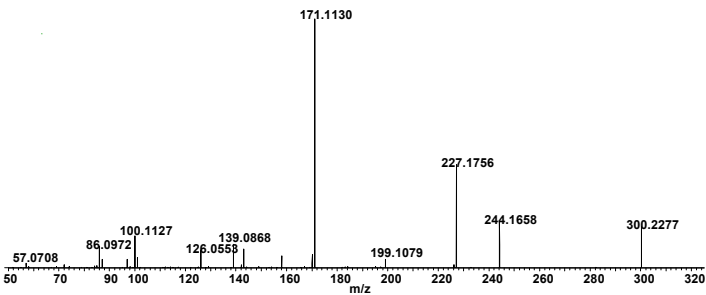

87. DEOXYCARNITINE

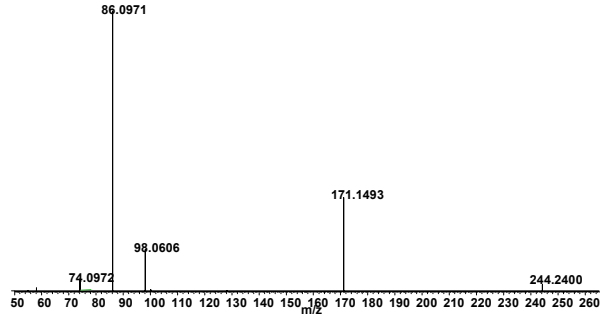

Supplementary Figure 12. MS/MS spectra for 250 derivatized metabolite standards

88. GAMMA-AMINOBUTYRATE/2-AMINOISOBUTYRATE

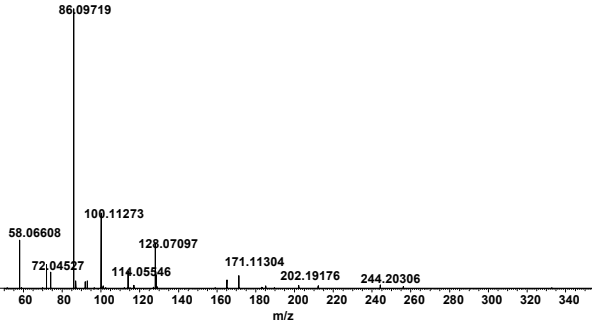

90. CADAVERINE

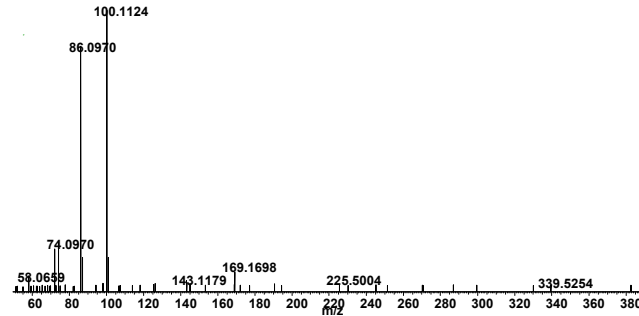

91. HISTAMINE

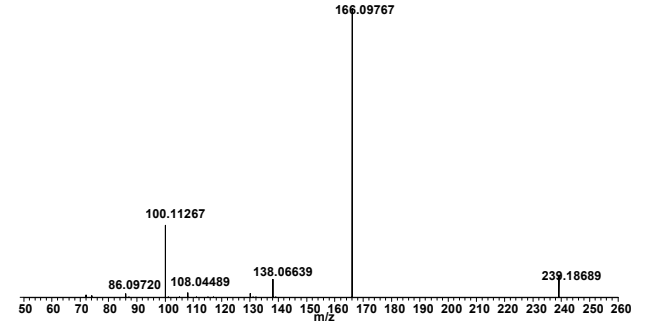

N-ACETYLPUTRESCINE

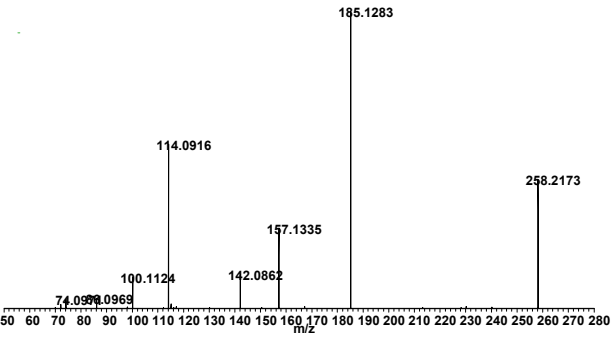

93. QUINATE

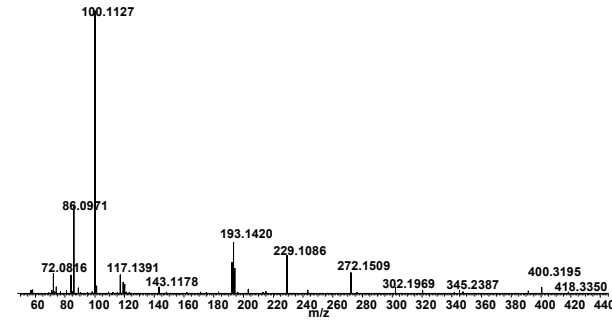

94. FERULATE

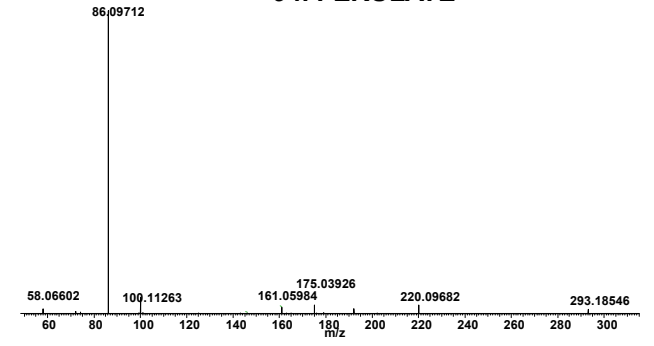

95. METHYLMALONATE

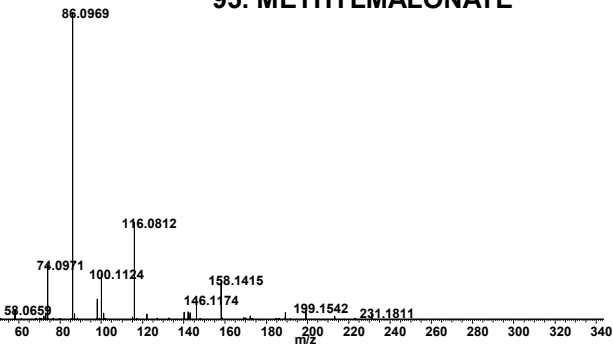

96. METHYL 4-AMINOBUTYRATE/ MONOMETHYLGLUTARATE

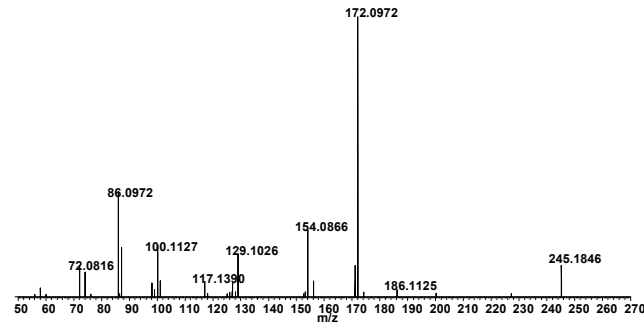

98. 3-AMINO-4-HYDROXYBENZOATE

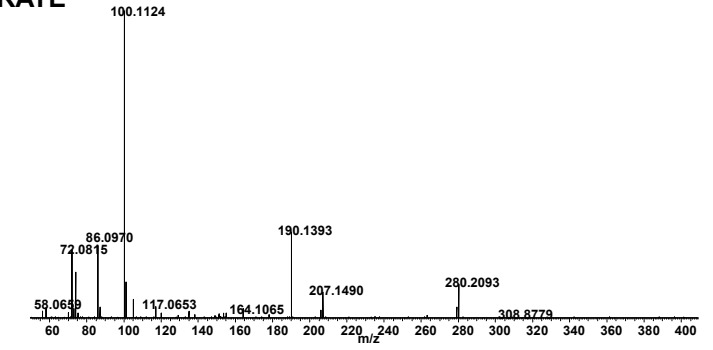

Supplementary Figure 13. MS/MS spectra for 250 derivatized metabolite standards

99. QUINOLINATE

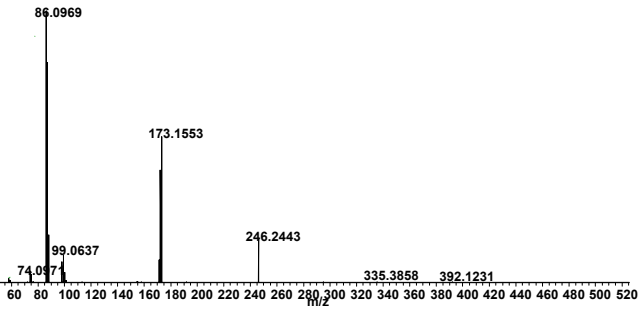

100. 3,4 DIHYDROXYMANDELATE

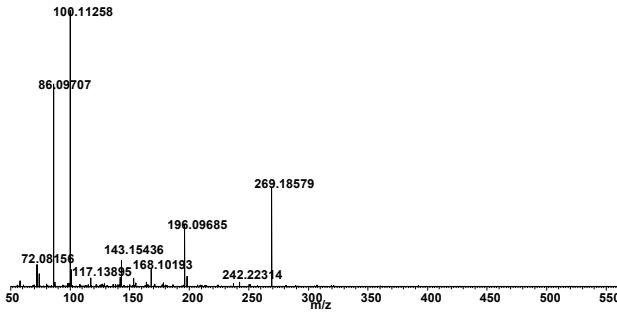

101. SEROTONIN

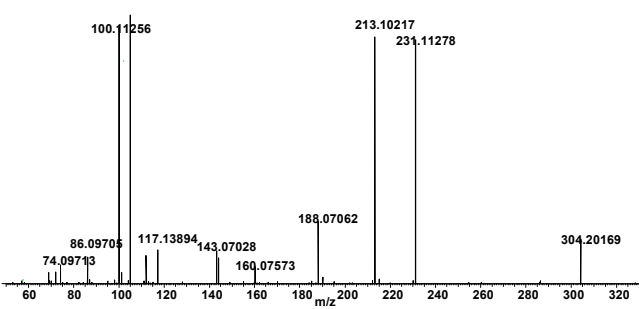

101. HYDROXYPYRUVATE

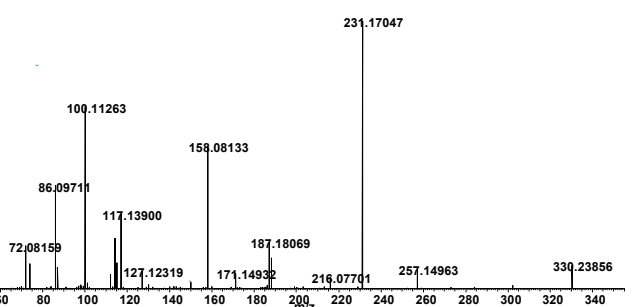

102. ERYTHRITOL

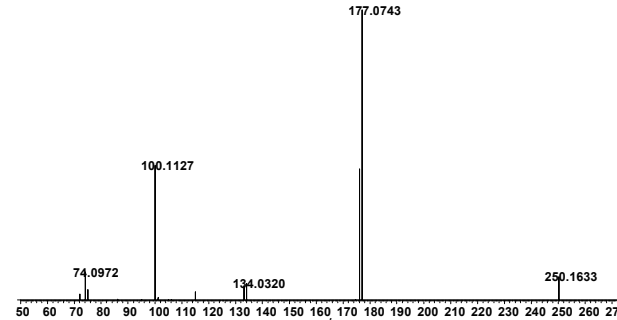

103. N-(3-AMINOPROPYL)PIPERIDNE

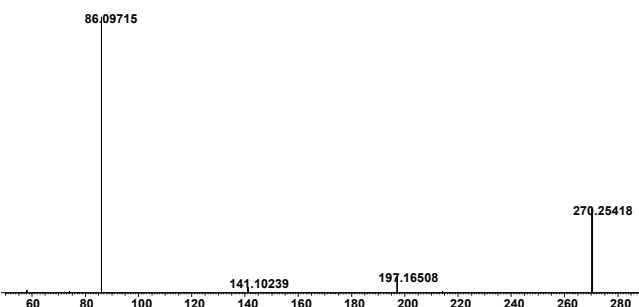

104. PYRAZOLE

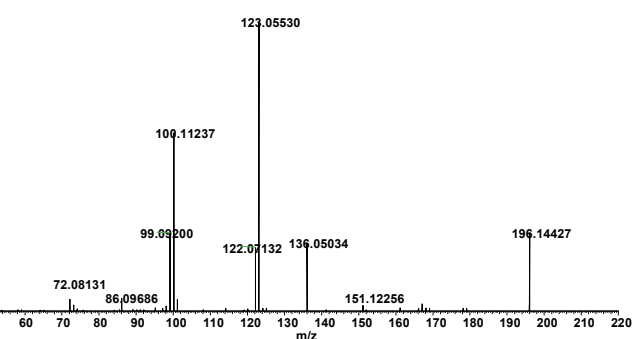

105. 2-QUINOLINECARBOXYLATE

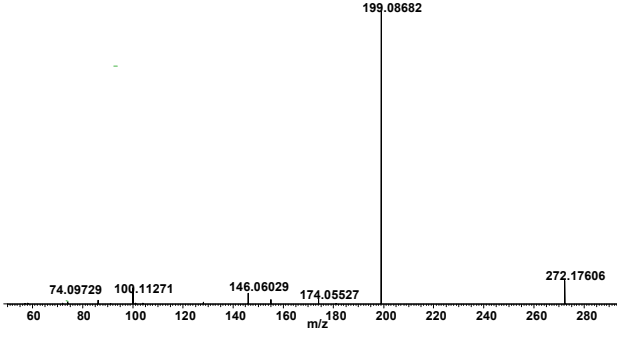

106. 5-AMINOLEVULINATE

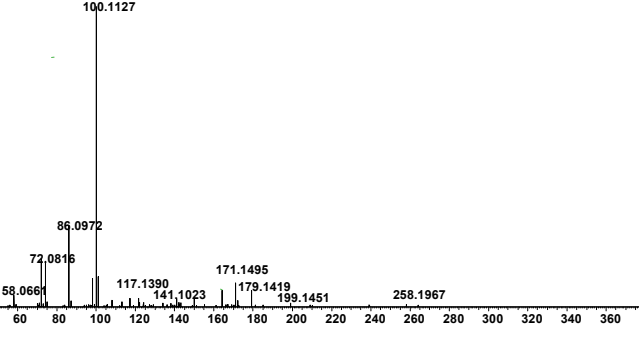

Supplementary Figure 14. MS/MS spectra for 250 derivatized metabolite standards

107. OXALATE/N-ALPHA-ACETYLLYSINE

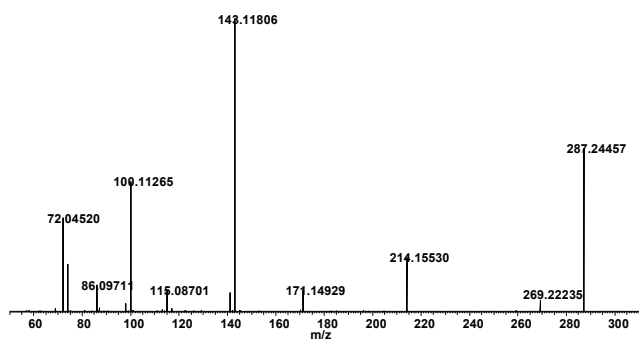

109. LACTATE

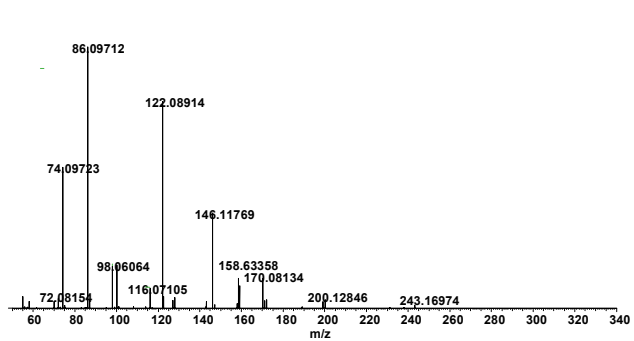

110. TYROSINE

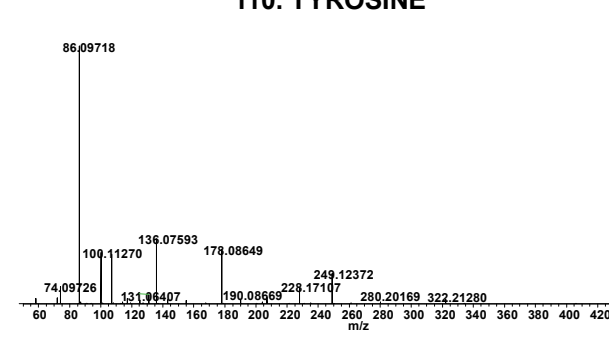

111. NICOTINATE

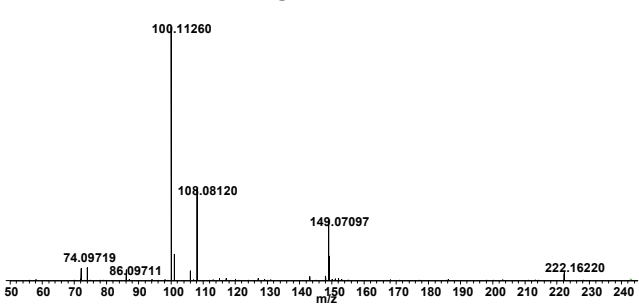

112. VALINE/NORVALINE

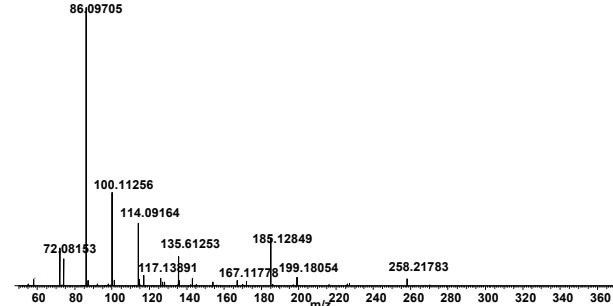

114. DIHYDROXYFUMARATE

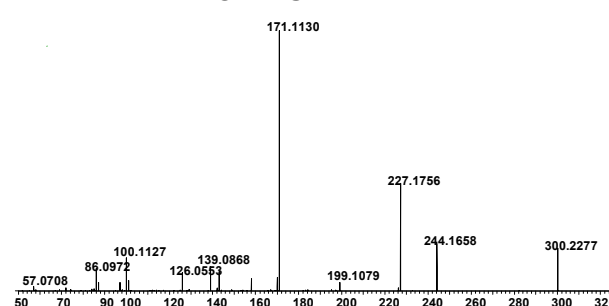

116. SUBERATE

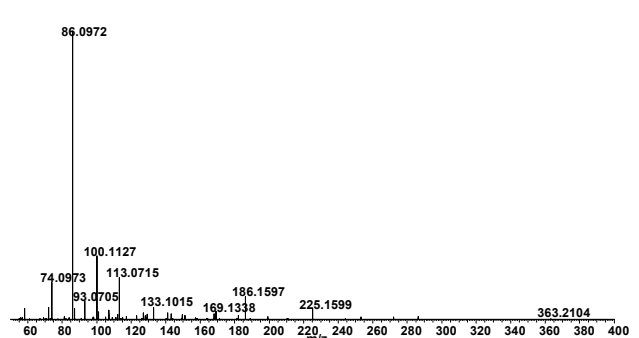

117. ACETOACETATE/SUCCINATE SEMIALDEHYDE

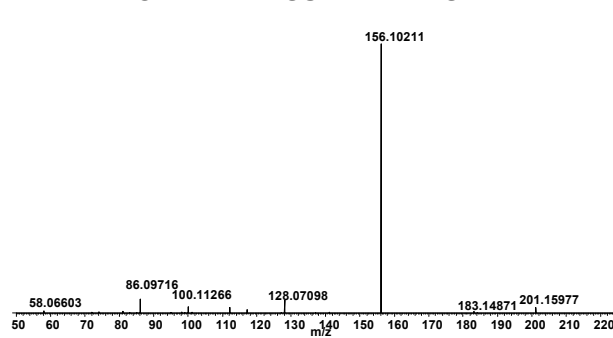

119. 3-METHOXYTYROSINE

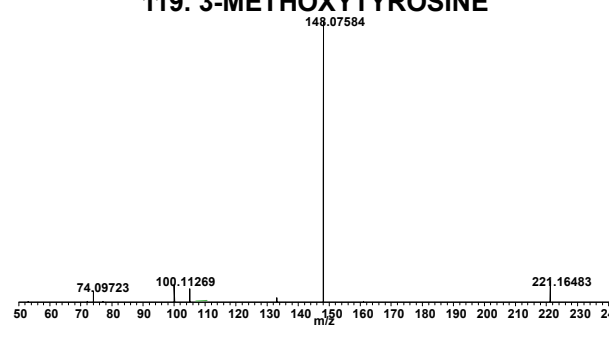

Supplementary Figure 15. MS/MS spectra for 250 derivatized metabolite standards

120. HOMOCYSTINE

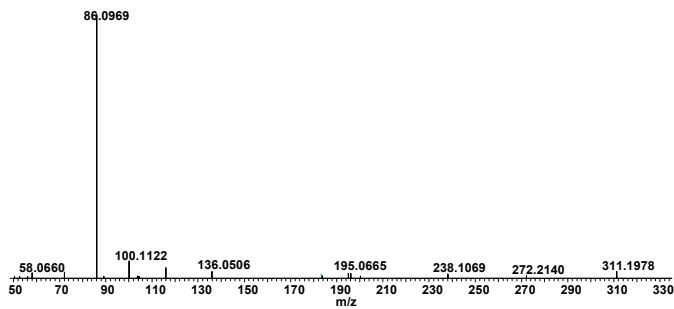

121. FUMARATE

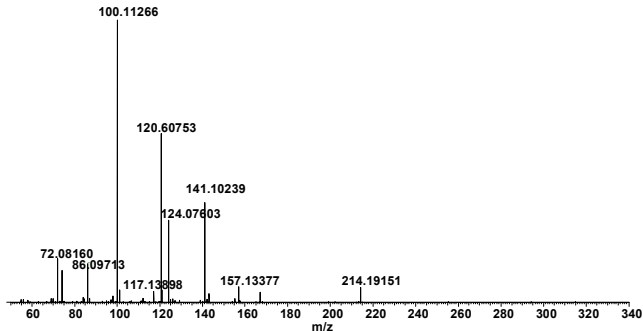

122. 4-FORMYL BENZOIC ACID

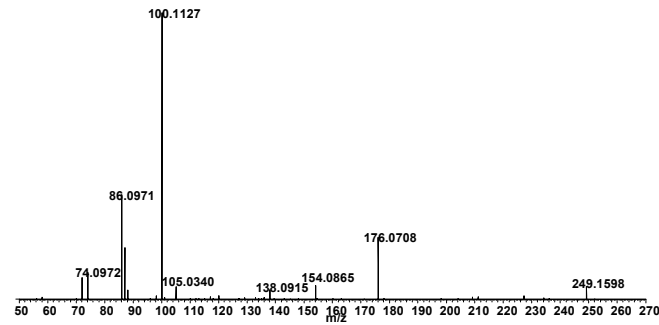

123. HOMOGENTISATE

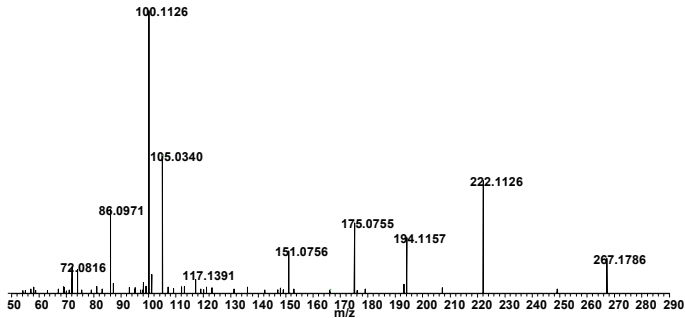

124. 5-HYDROXYTRYPTOPHAN

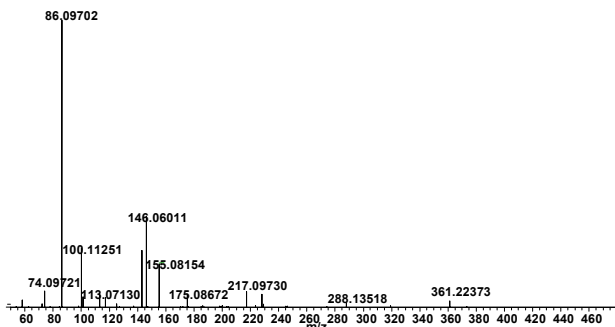

125. KETOLEUCINE

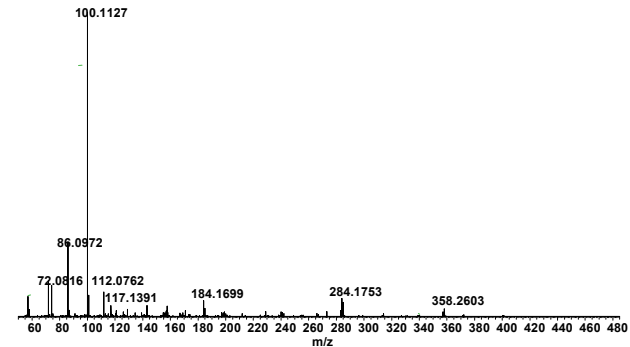

126. N-ACETYLPHENYLALANINE

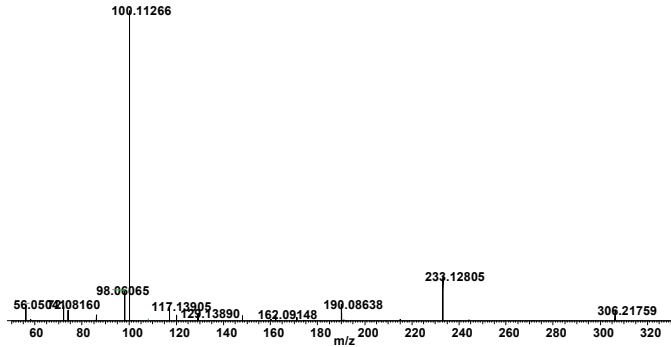

127. L-DOPA

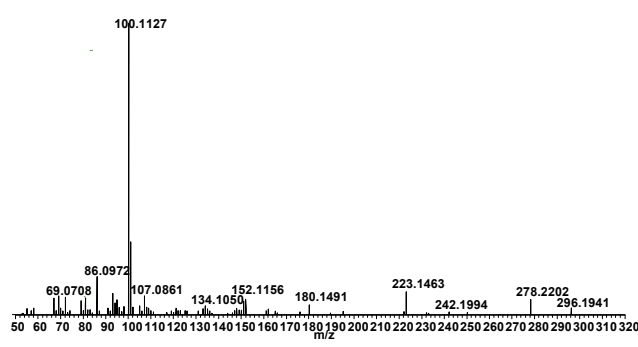

128. OXOADIPATE

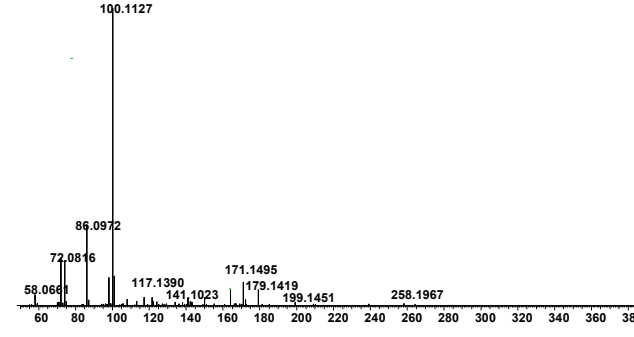



Supplementary Figure 16. MS/MS spectra for 250 derivatized metabolite standards

129. EPINEPHRINE/NORMETANEPHRINE

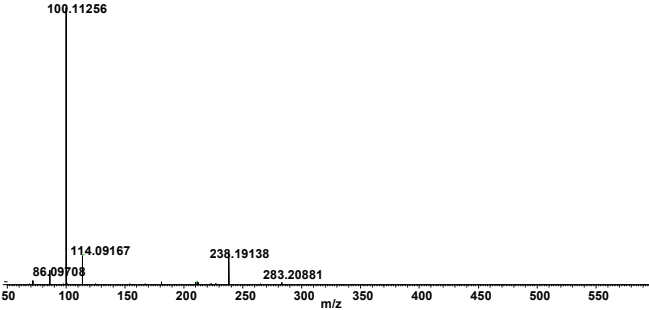

131. 2-METHYLMALEATE

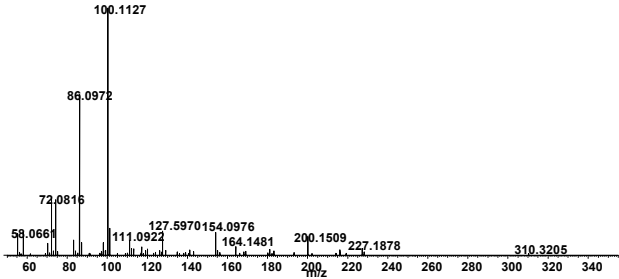

132. N-ACETYLLEUCINE

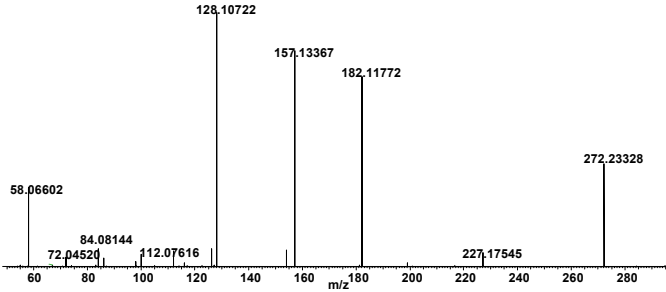

133. PUTRESCINE

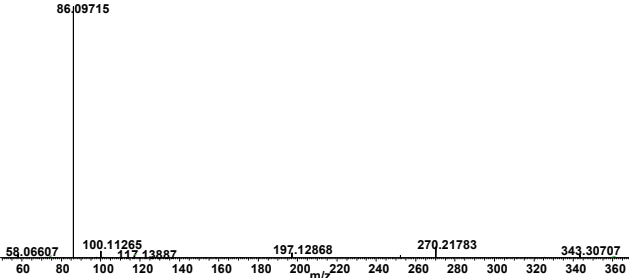

134. 2-NITROBENZOIC ACID

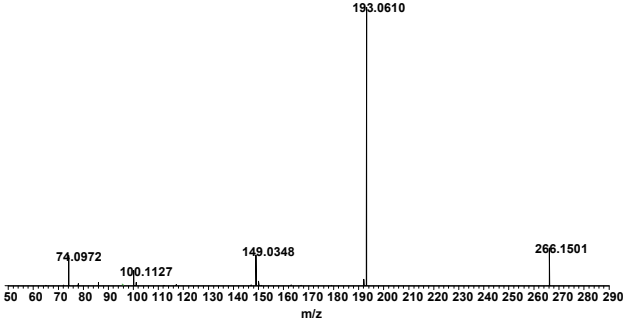

135. 1-HYDROXY-2-NAPHTHOATE

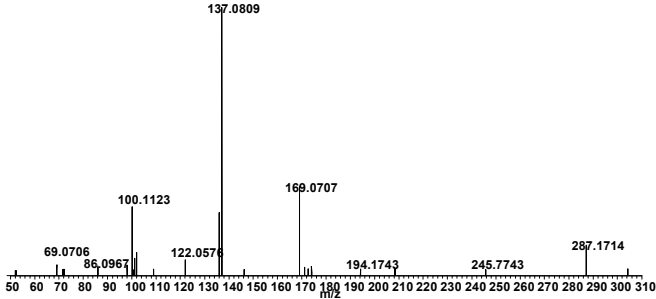

136. PHENYLETHANOLAMINE

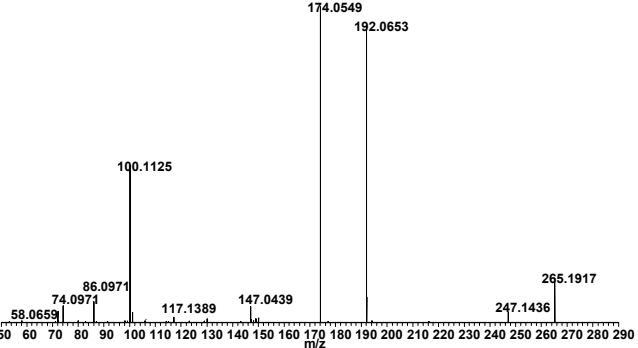

137. 3-(2-HYDROXYPHENYL)PROPANOATE

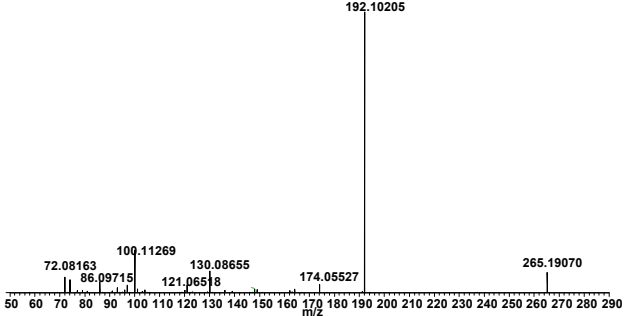

138. SORBATE

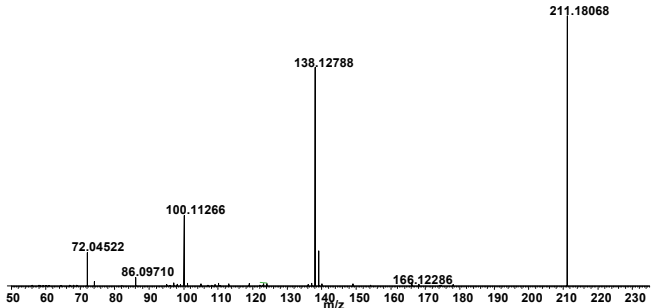

Supplementary Figure 17. MS/MS spectra for 250 derivatized metabolite standards

139. CITRAMALATE

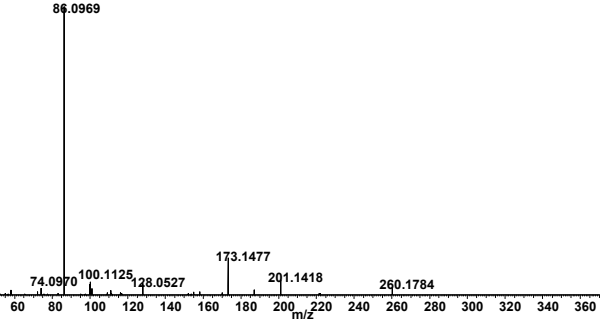

140. 2-AMINOPHENOL

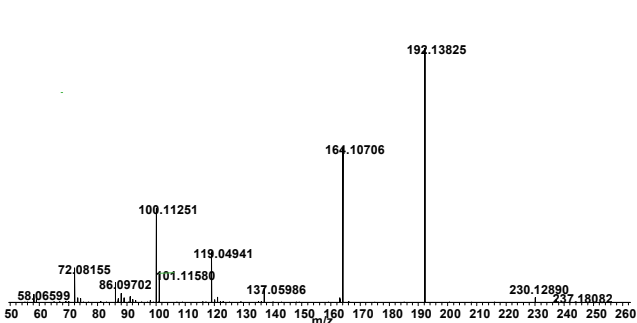

141. 1-(2-AMINOETHYL)PIPERIDINE

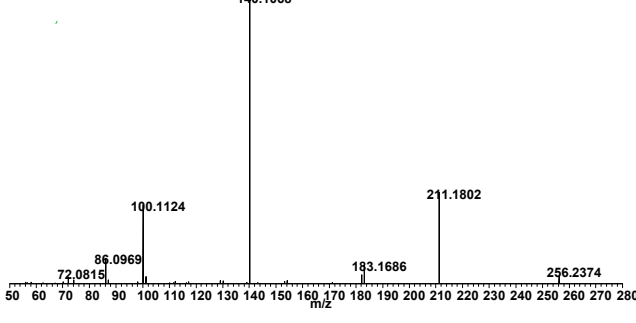

142. BENZOATE/ANILINE

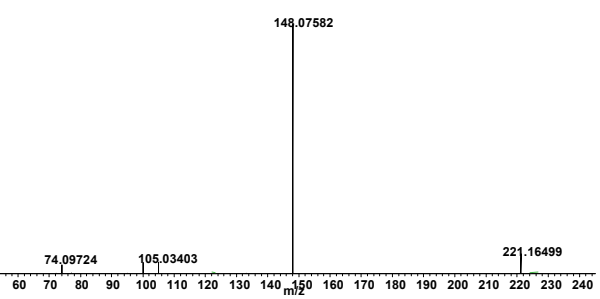

144. 3-METHOXYTYRAMINE

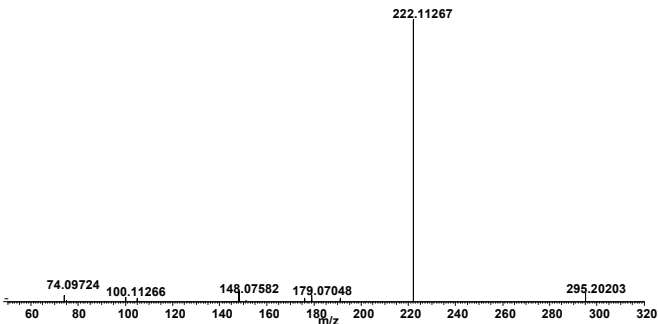

145. PHENYLALANINE

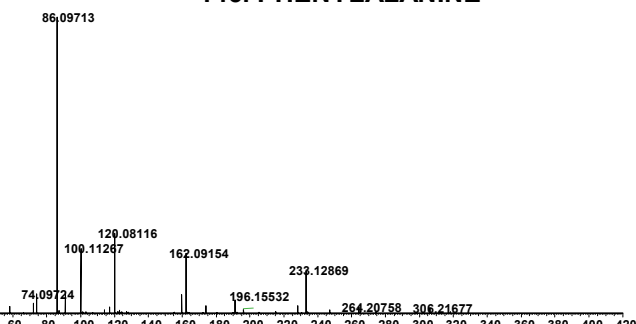

146. METHIONINE

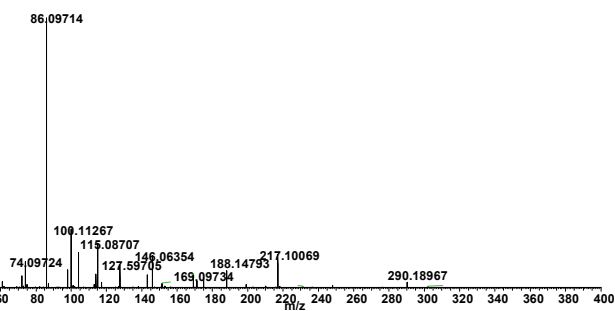

147. 5-AMINOPENTANOATE/2-METHYLGUTARATE/ADIPATE

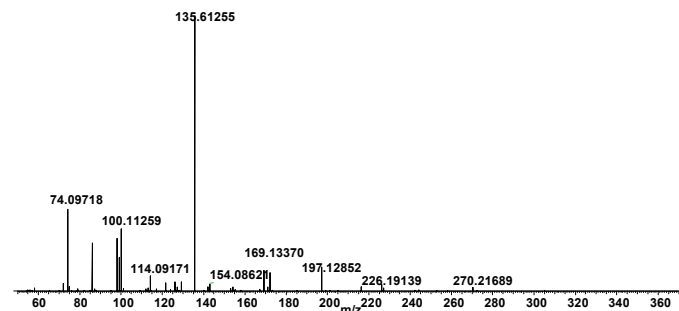

150. AZELATE

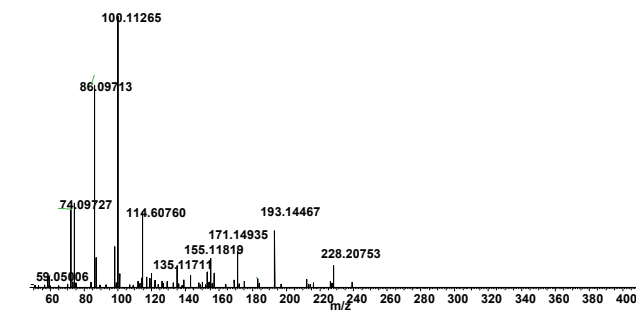

Supplementary Figure 18. MS/MS spectra for 250 derivatized metabolite standards

151. ACETOIN

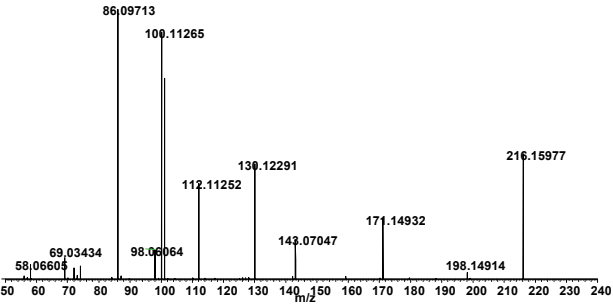

152. 2,4-PYRIDINEDIACARBOXYLIC ACID

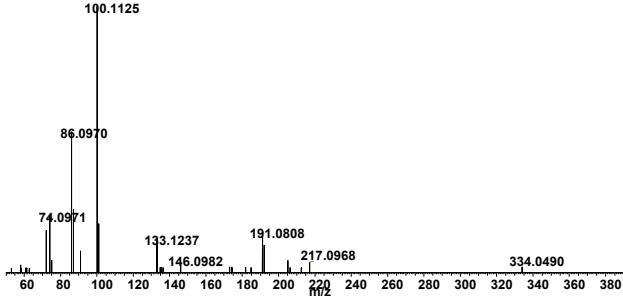

153. INDOLE-3-ACETATE

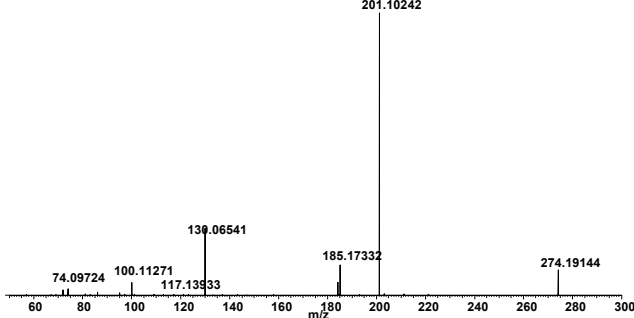

154. D-MANNOSAMINE/GLUCOSAMINE/GALACTOSAMINE

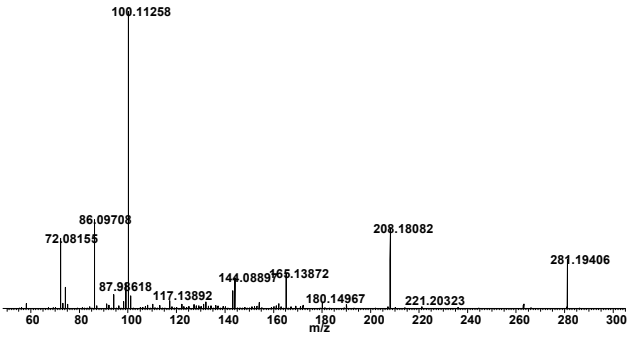

157. 2-METHYLCITRATE

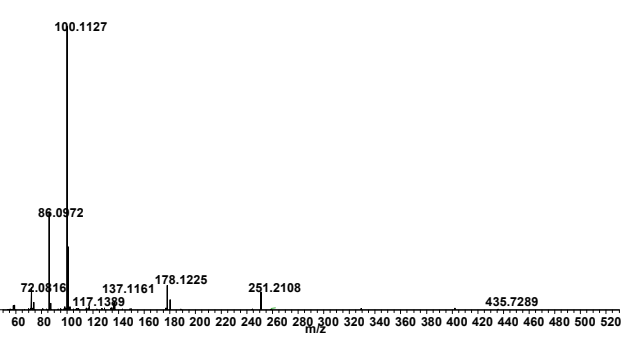

158. SELENOMETHIONINE

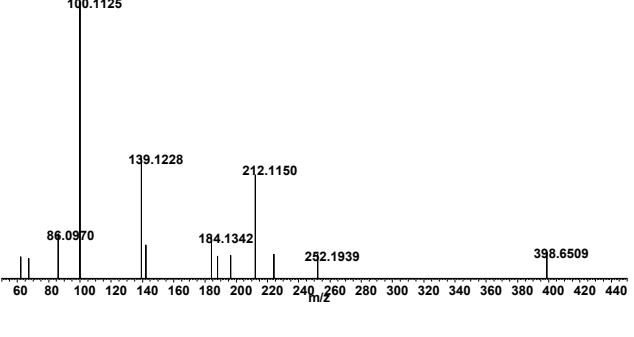

159. 4-AMINO ACETOPHENONE/ 4-COUMARATE

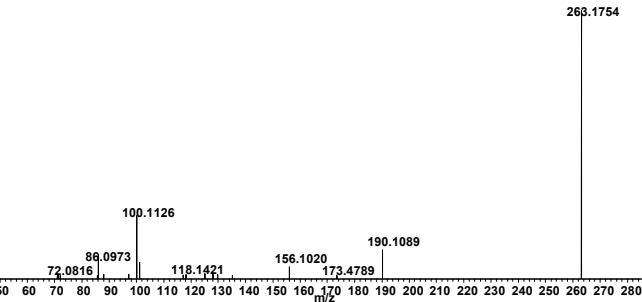

161. N-METHYLTRYPTAMINE

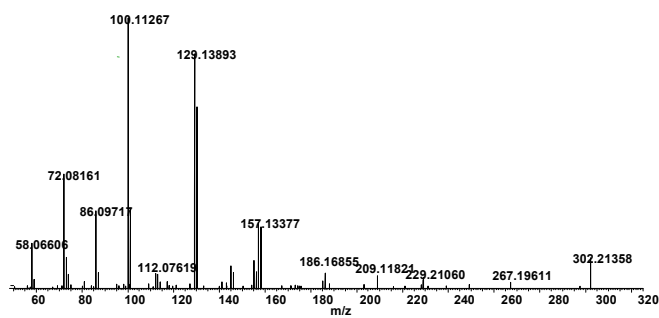

162. CYCLOHEXANE 1,2 DIAMINE

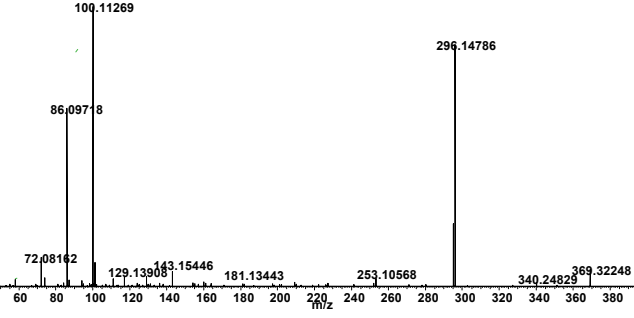

Supplementary Figure 19. MS/MS spectra for 250 derivatized metabolite standards

163. PHENETHYLAMINE

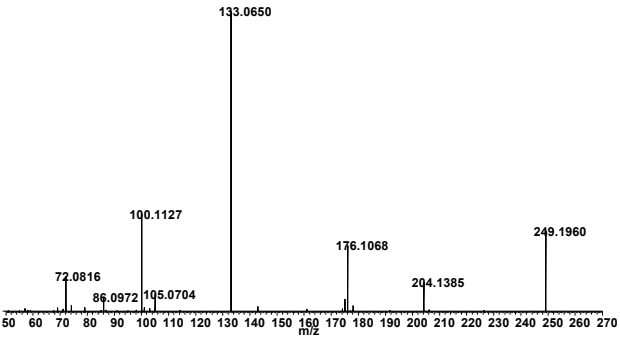

164. 3-HYDROXYANTHRANILATE

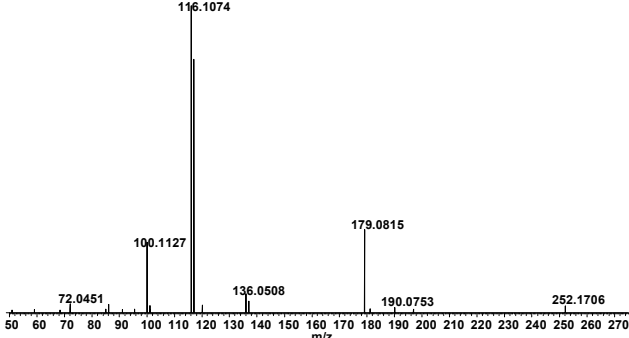

165. 3-DEHYDROSHIKIMATE

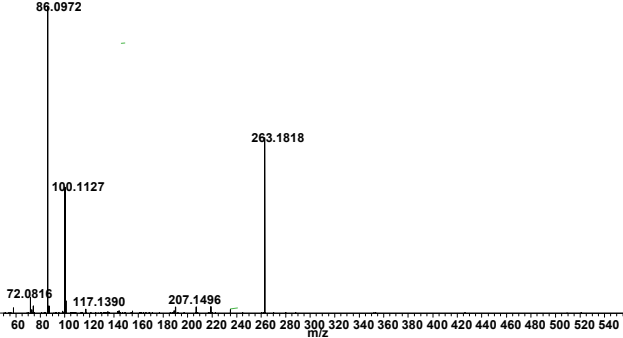

166. SEBACATE

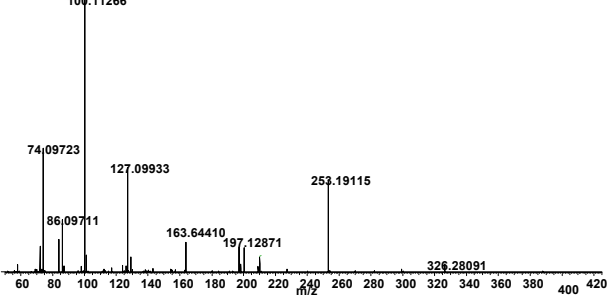

167. PIPECOLATE

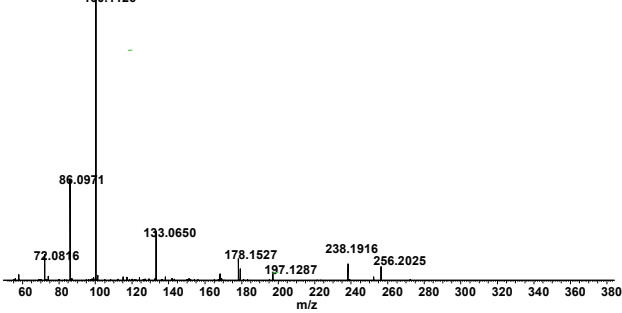

168. HEXANOATE

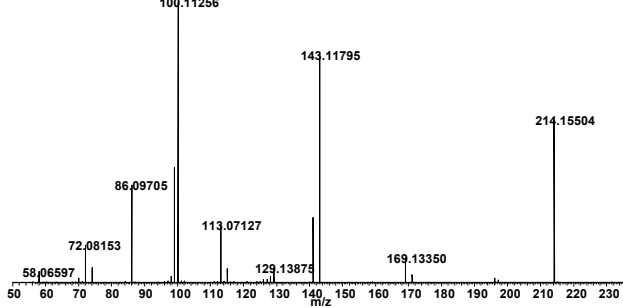

169. LEUCINE/ISOLEUCINE/NORLEUCINE

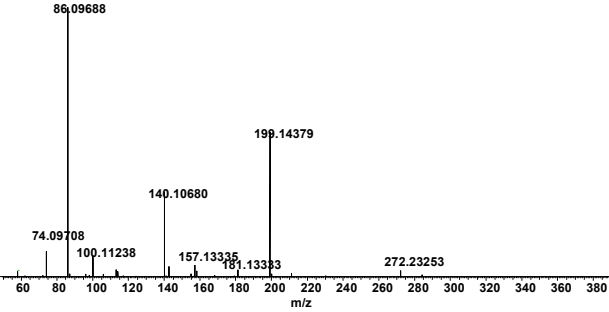

172. NORSPERMIDINE

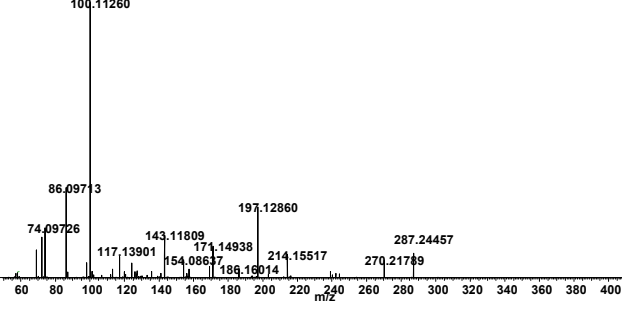

173. 10-HYDROXYDECANOATE

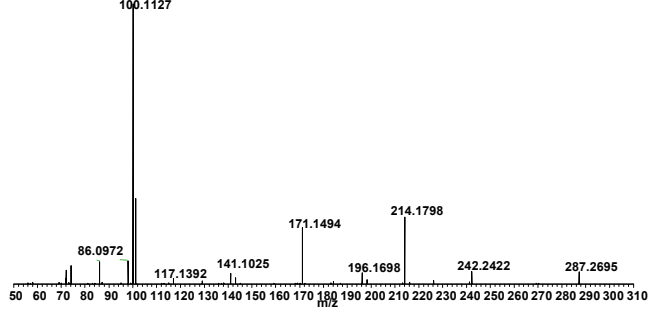

Supplementary Figure 20. MS/MS spectra for 250 derivatized metabolite standards

174. 2,3-BUTANEDIOL

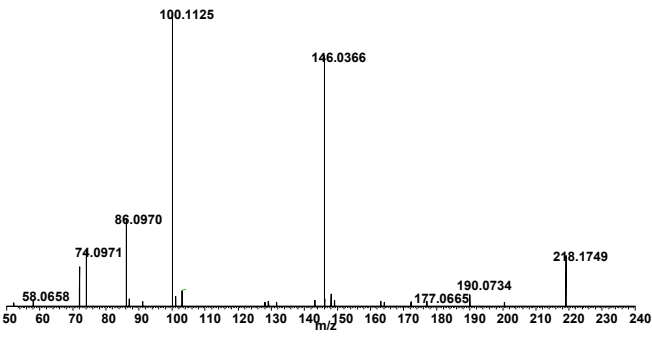

175. 4-IMIDAZOLEACETATE

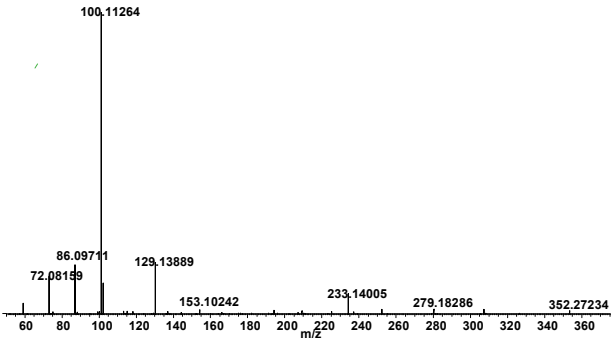

176. 2/3-P-HYDROXYPHENYLACETATE/MANDELATE

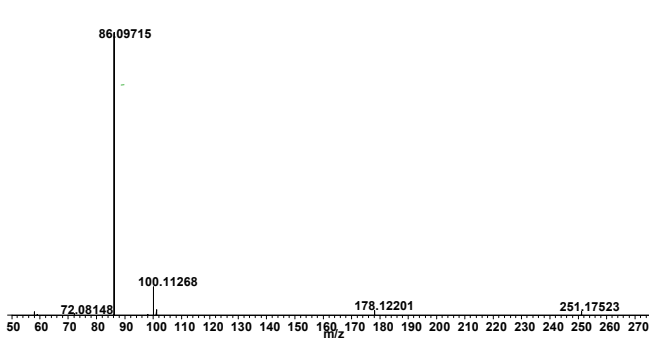

180. TRYPTAMINE

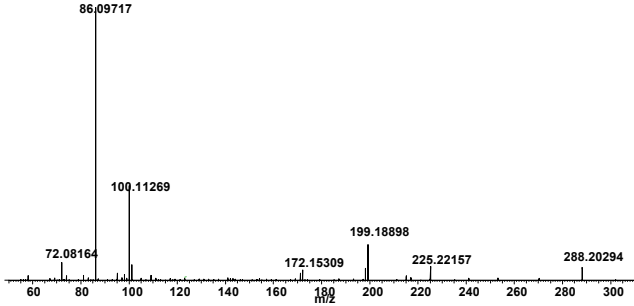

181. 4-AMINO BENZOATE/TRIGONELLINE

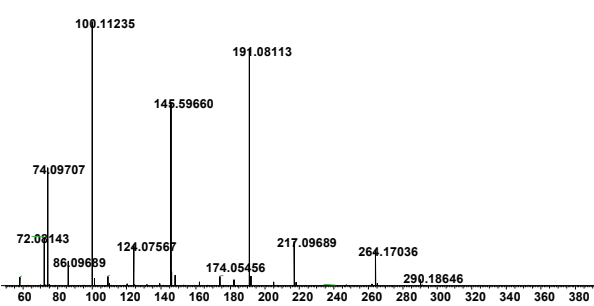

183. TRYPTOPHAN

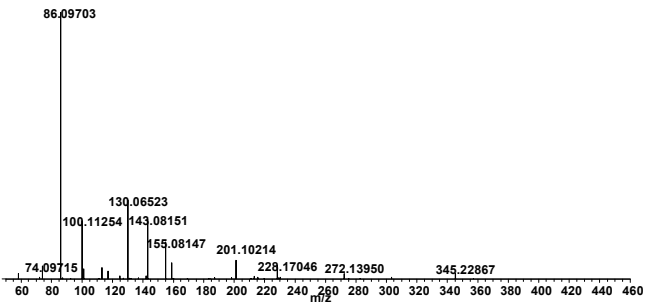

184. CYCLOHEXANE 1,4 DIAMINE

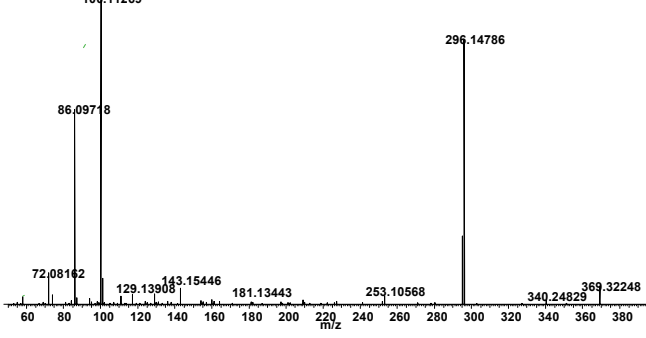

185. 6-AMINO CAPRIC ACID/6-CARBOXYHEXANOATE

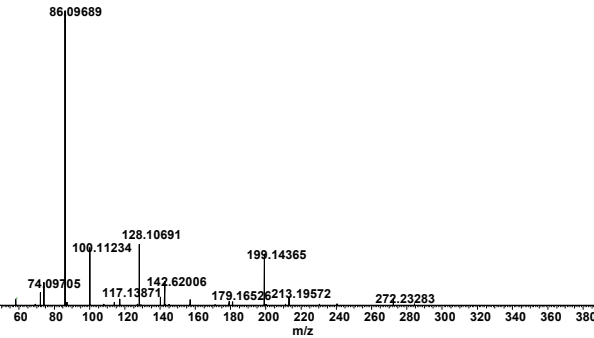

187. 1-CYCLOHEXYLPIPERAZINE

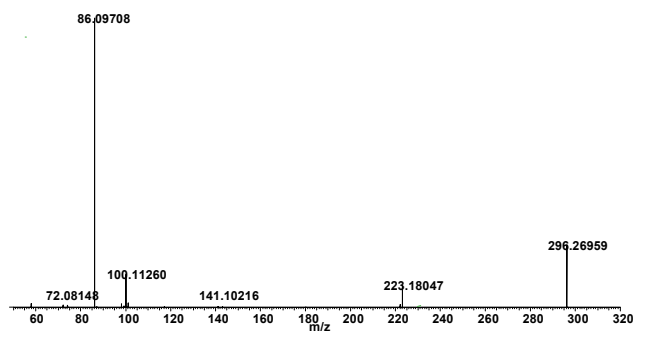

Supplementary Figure 21. MS/MS spectra for 250 derivatized metabolite standards

188. 3-SULFINOALANINE

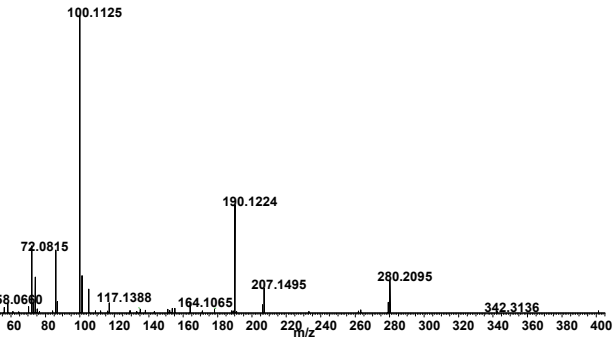

189. HYPOTAURINE

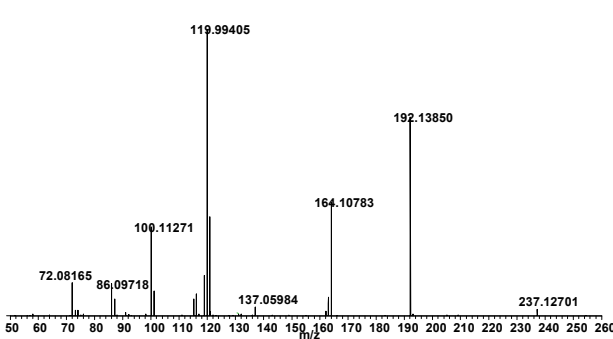

190. DOPAMINE

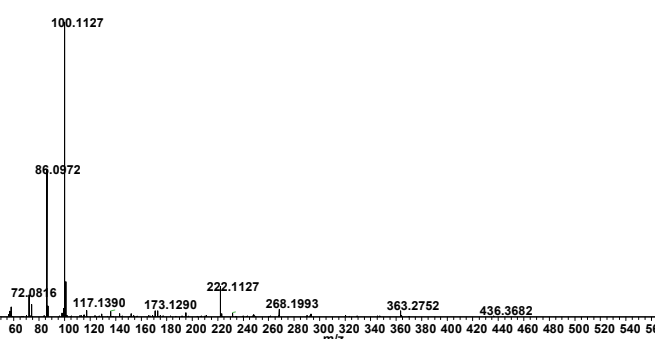

191. TRANS-CINNAMATE

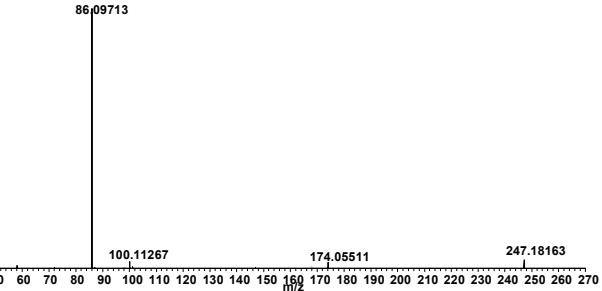

192. GLUCONATE

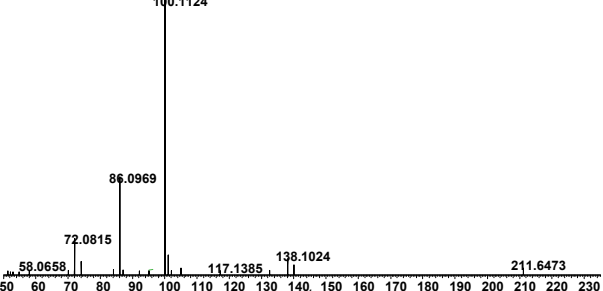

193. 1,3-BENZENEDIMETHYL AMINE

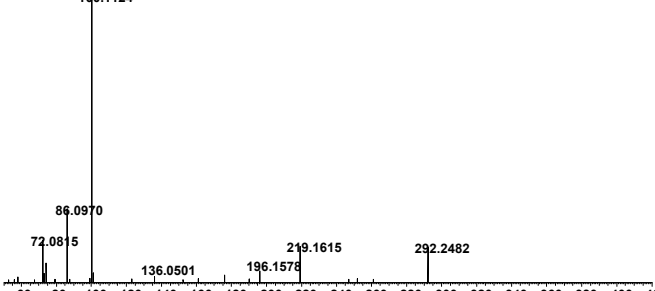

194. MONO METHYL FUMARATE

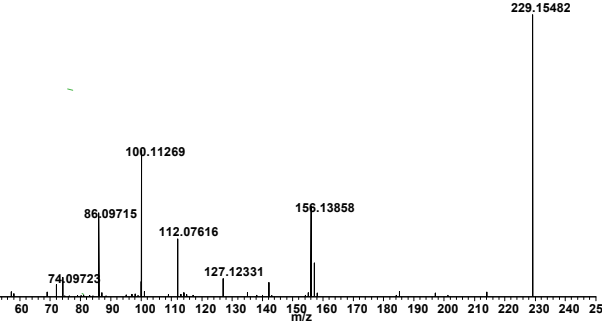

195. 4-QUINOLINECARBOXYLATE

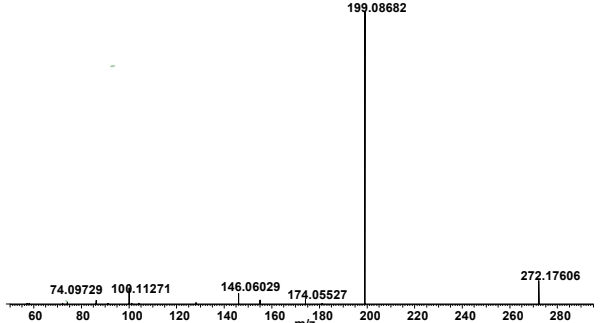

196. GUANIDINOSUCCINATE

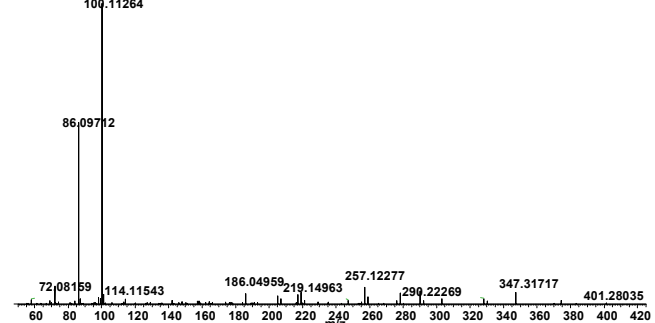

Supplementary Figure 22. MS/MS spectra for 250 derivatized metabolite standards

197. HEPTANOATE

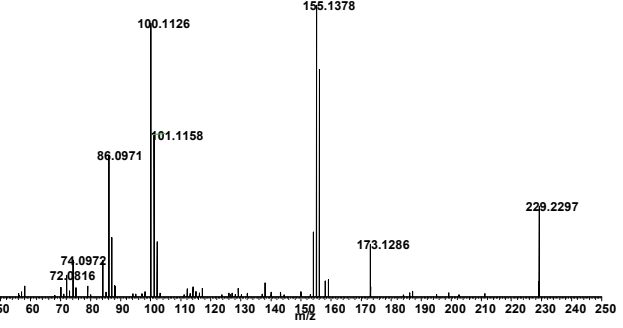

198. GLUCURONATE/GALACTURONATE

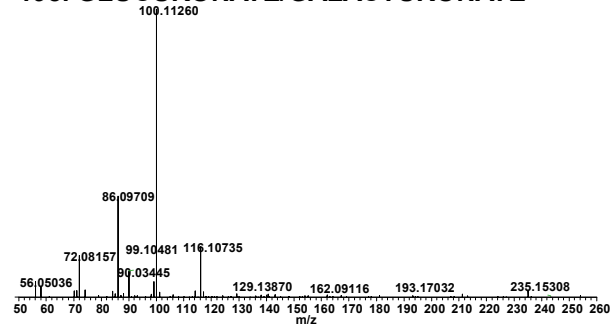

200. INDOLE-3-ETHANOL

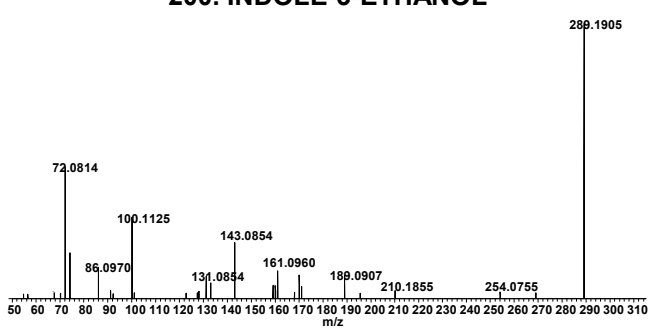

201. L-TRYPTOPHANAMIDE

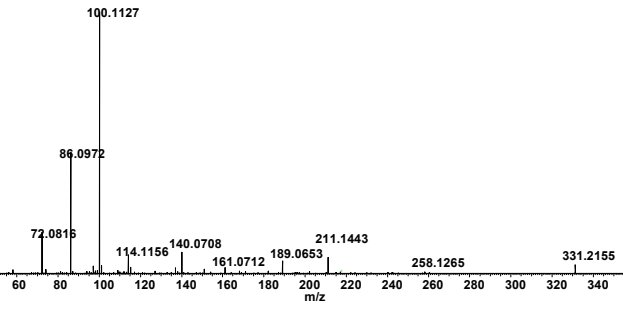

202. P-OCTOPAMINE

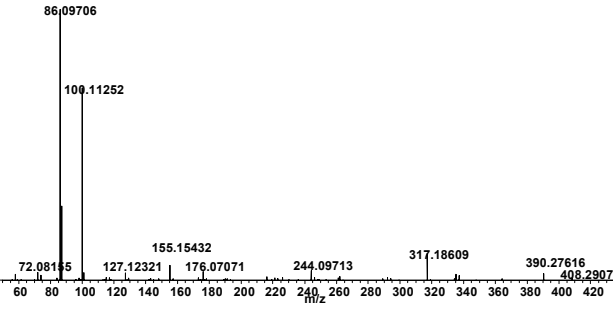

203. 4-(DIETHYLAMINO) BENZOIC ACID

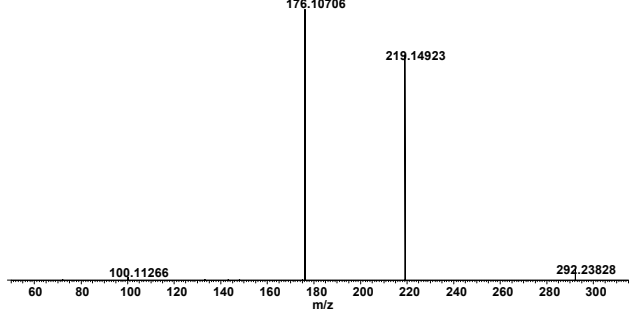

204. ETHYL 3-UREIDOPROPIONATE

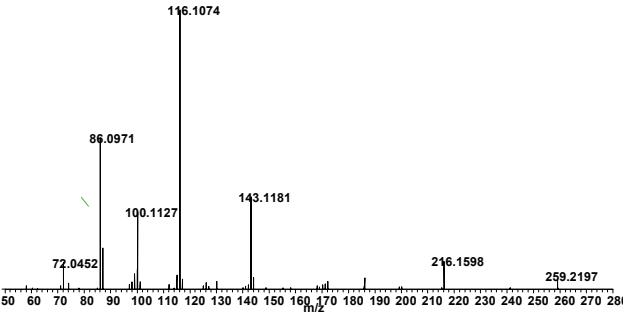

205. 5-HYDROXYINDOLEACETATE

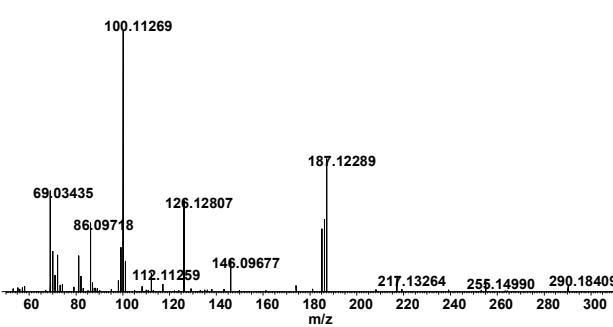

206. ANSERINE

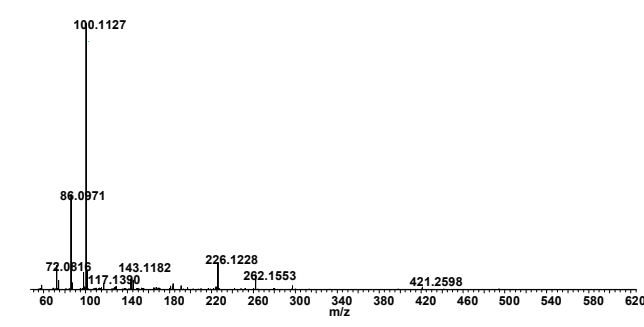

Supplementary Figure 23. MS/MS spectra for 250 derivatized metabolite standards

207. N-ACETYLTRYPTOPHAN

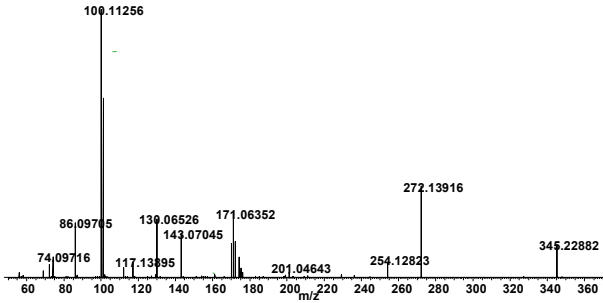

208. 1-PHENYLETHANOL

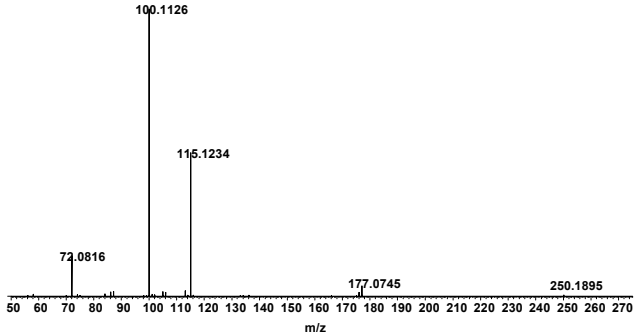

209. METHIONINE SULFOXIMINE

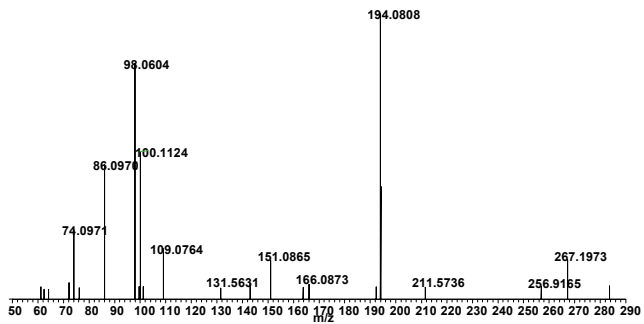

210. 4-HYDROXY-L-PHENYLGLYCINE

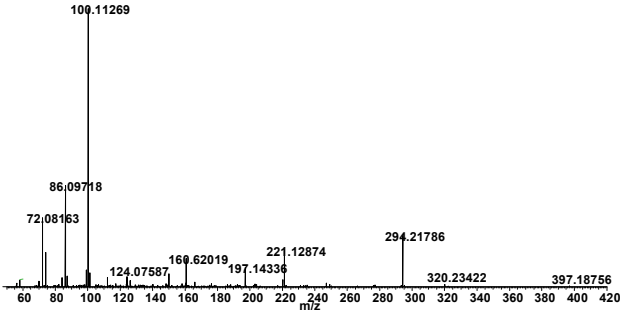

211. LYSINE

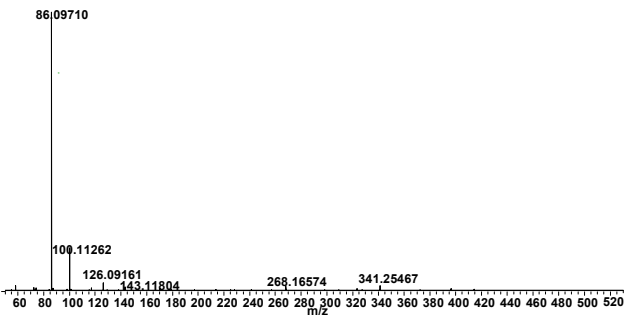

212. CAPRYLATE

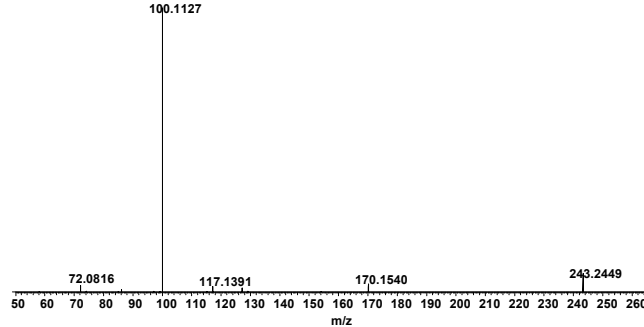

213. AMINOADIPATE

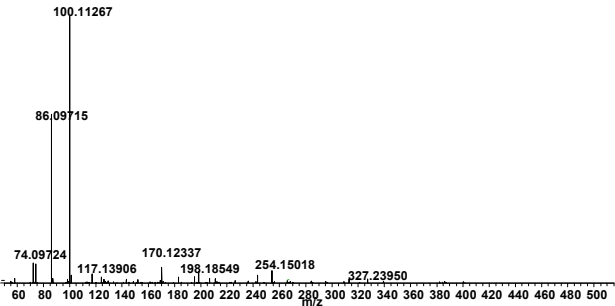

214. O-SUCCINYL-HOMOSERINE

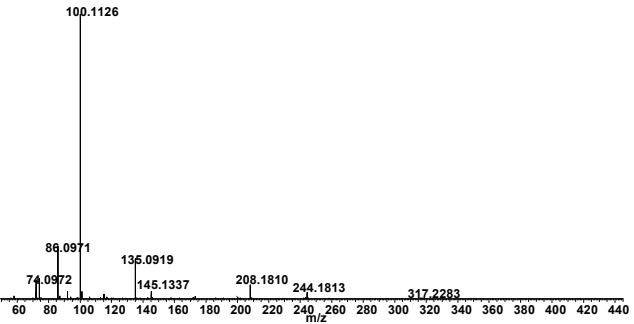

215. 3,5-DIAMINO BENZOIC ACID

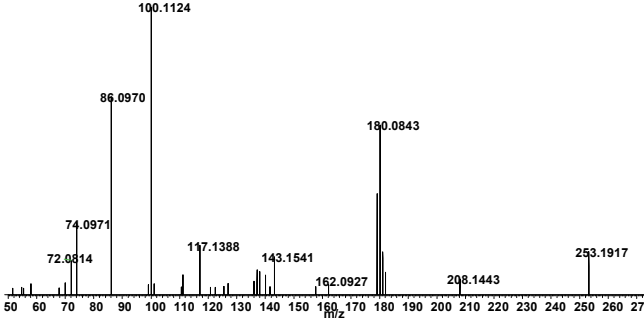



Supplementary Figure 24. MS/MS spectra for 250 derivatized metabolite standards

216. SALSOLINOL

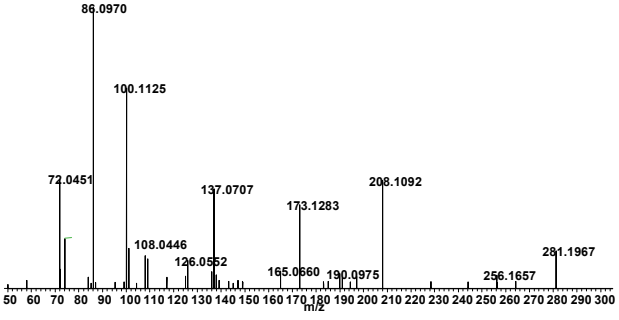

217. ITACONATE

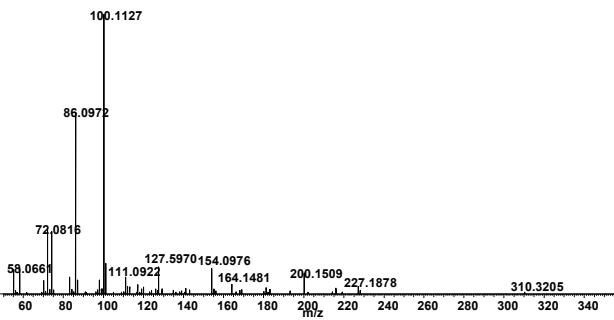

218. 3-HYDROXYMETHYLGLUTARATE

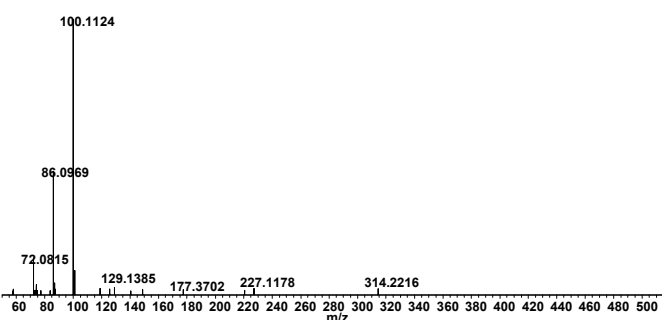

219. 1-AMINOCYCLOPROPANECARBOXYLATE

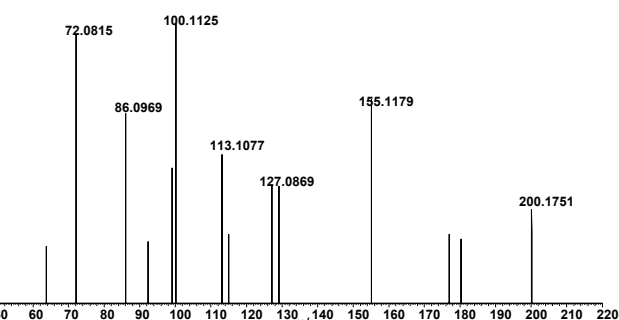

220. NONANOATE

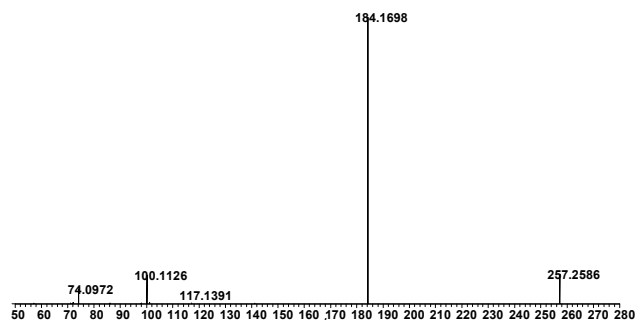

221. OXALOMALATE

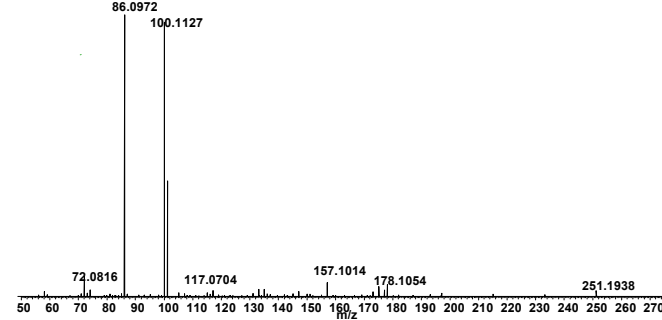

222. TRANS-4-CYCLOHEXANEDIOL

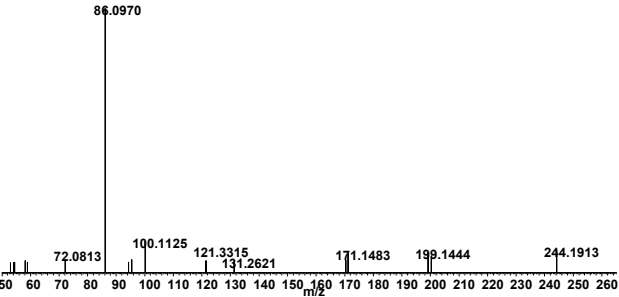

223. 3-METHYLGLUTAONATE

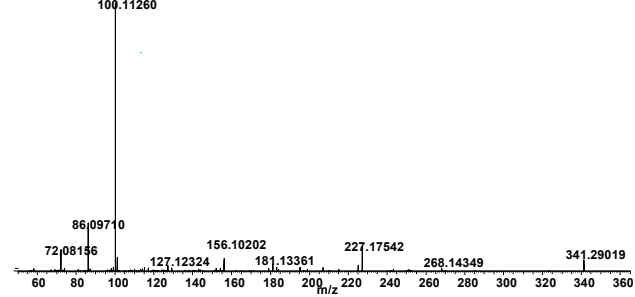

224. CITRULLINE

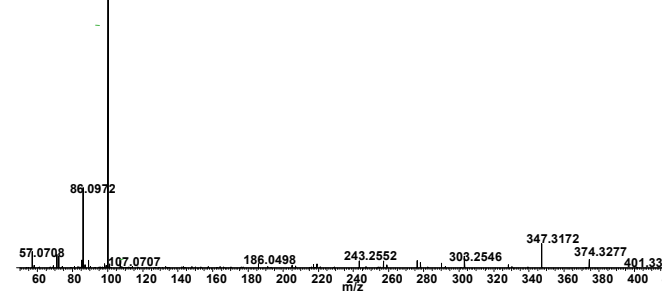

Supplementary Figure 25. MS/MS spectra for 250 derivatized metabolite standards

225. PYROCATECHOL/HYDROQUINONE

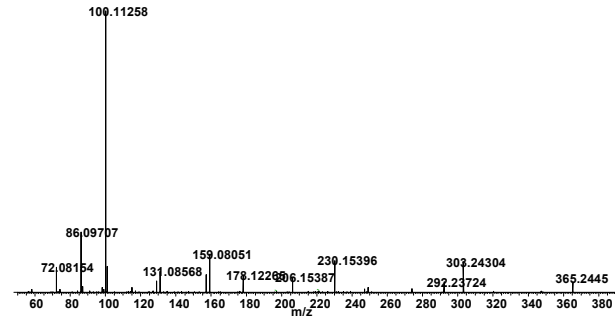

227. PORPHOBILINOGEN

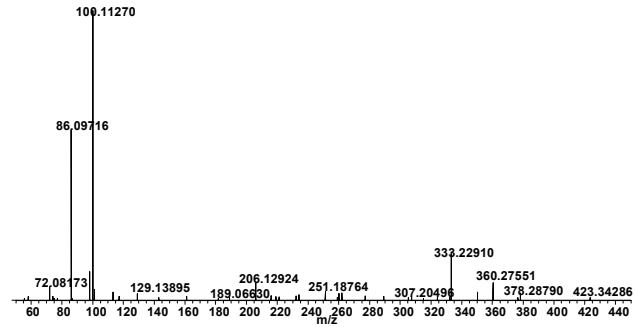

228. PANTOLACTONE

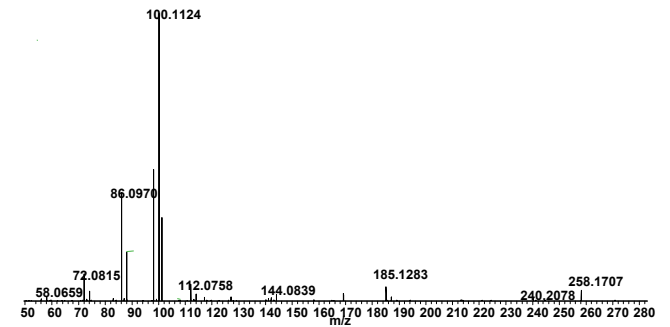

229. BENZYLAMINE

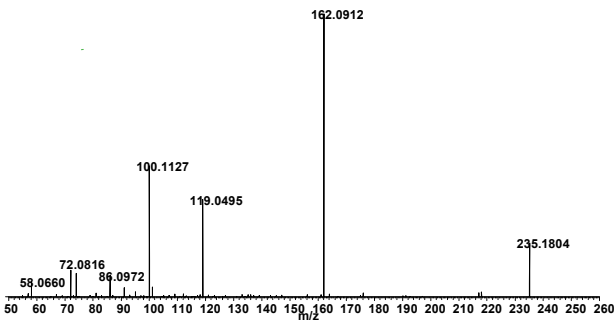

230. ARGININE

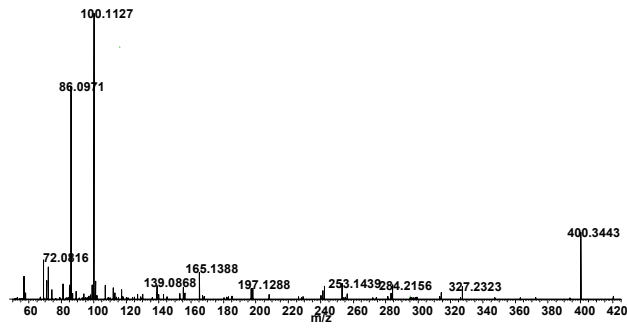

231. OROTATE

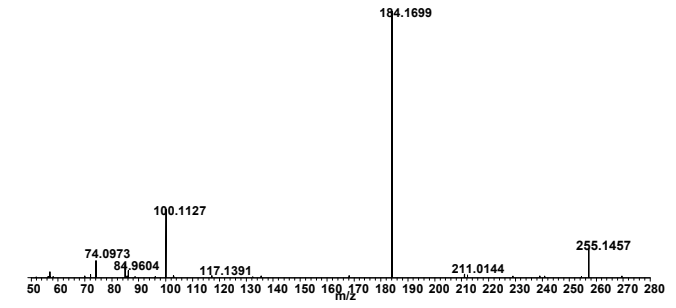

232. DECANOATE

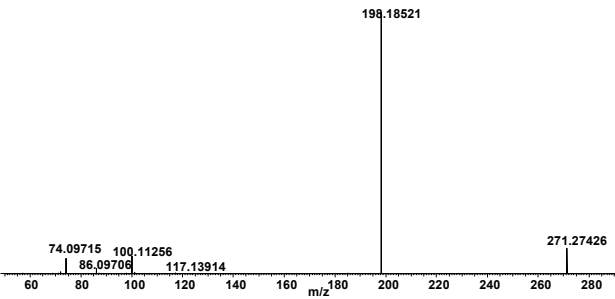

233. DIHYDROOROTATE

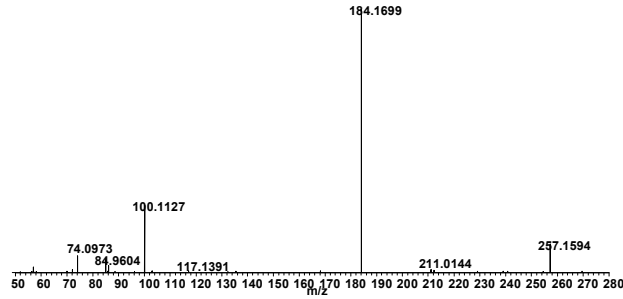

234. DIAMINOPIMELATE

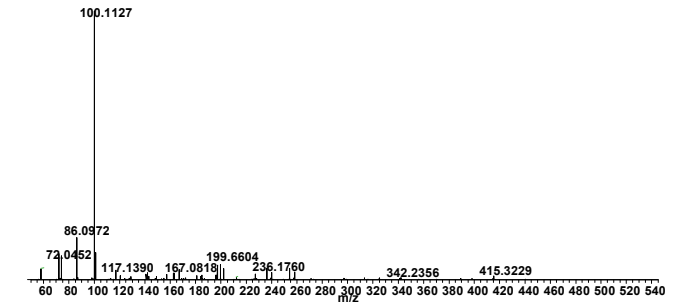

Supplementary Figure 26. MS/MS spectra for 250 derivatized metabolite standards

235. ASPARTATE

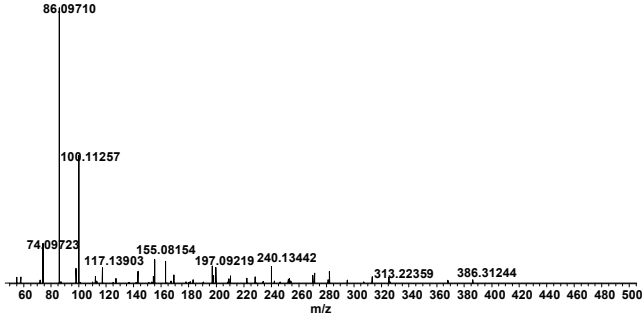

236. D-ORNITHINE

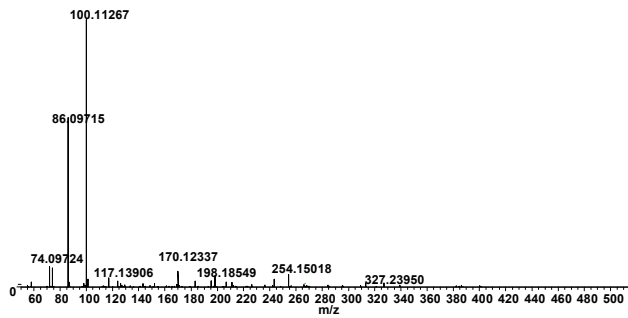

237. GLUTAMATE

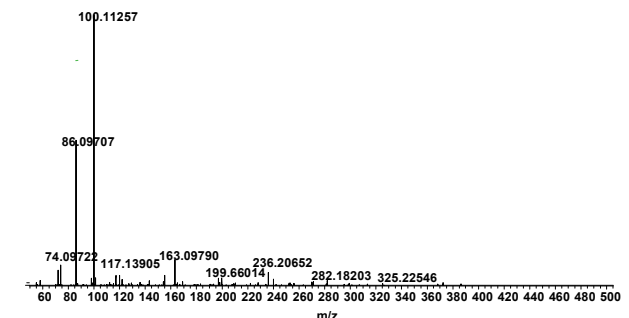

238. SPERMINE

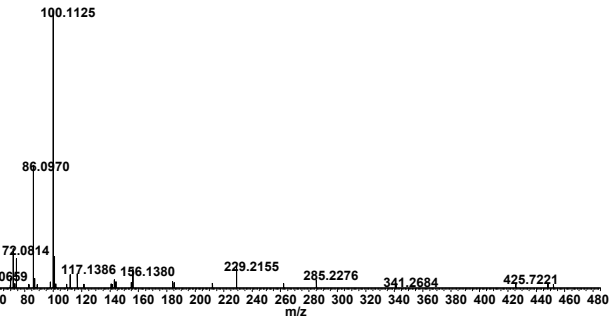

239. N1-ACETYLSPERMINE

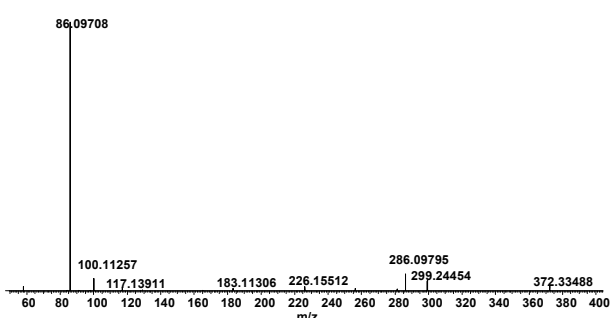

240. 4-PYRIDOXATE

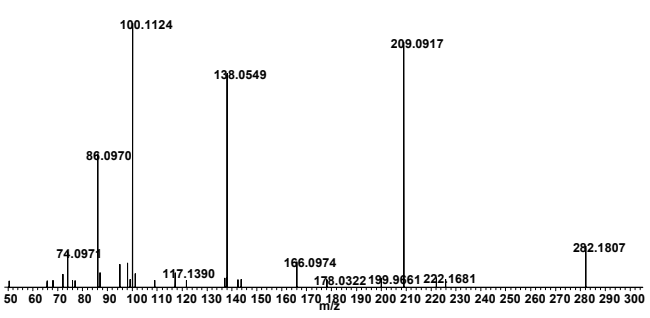

241. N-METHYLASPARTATE

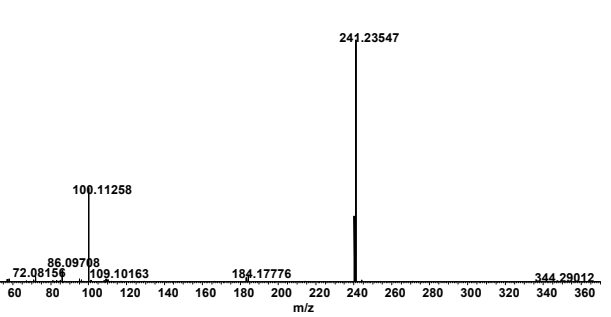

242. MALEAMATE

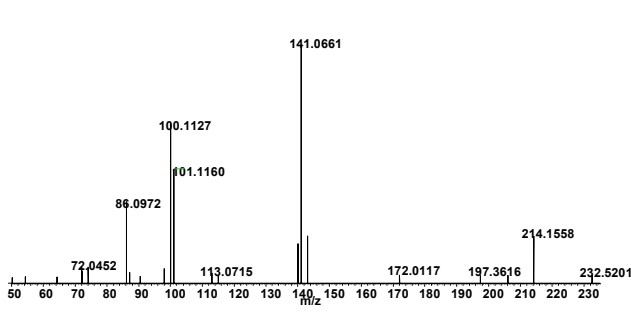

243. 4/3-HYDROXYBENZOATE/ SALICYLATE

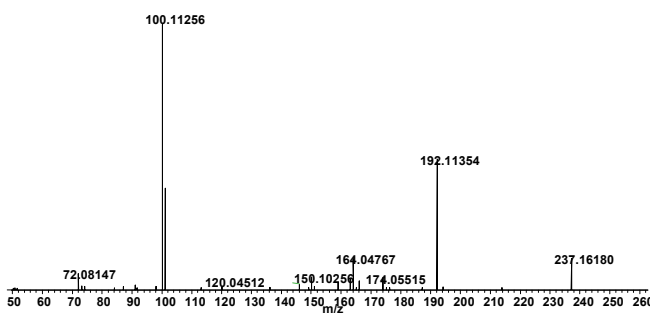

Supplementary Figure 27. MS/MS spectra for 250 derivatized metabolite standards

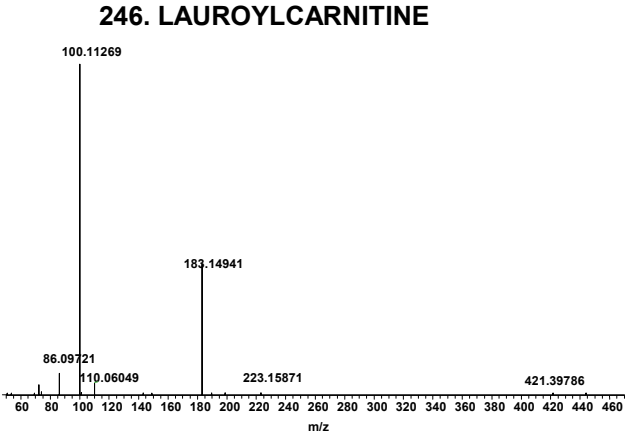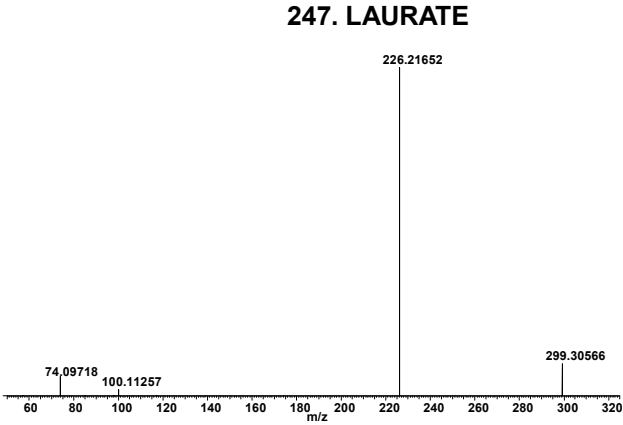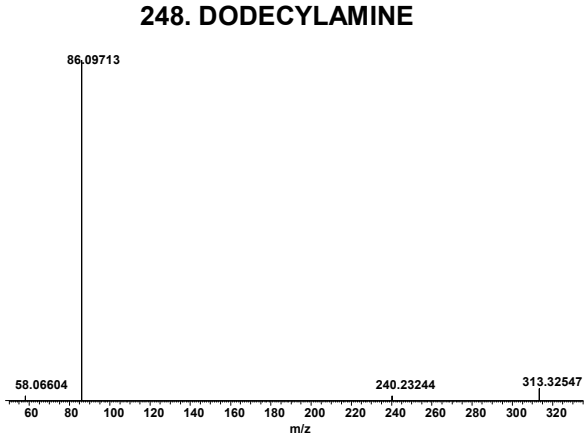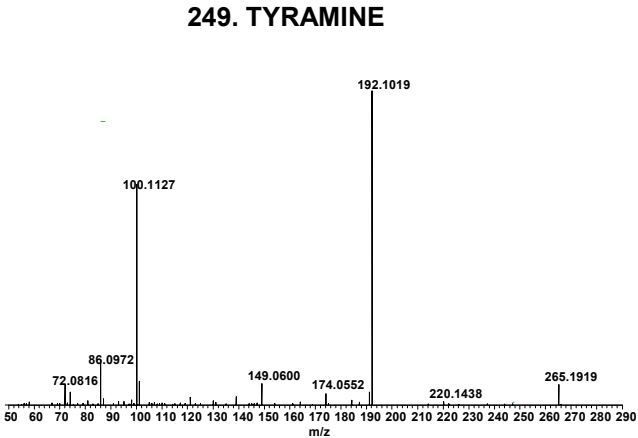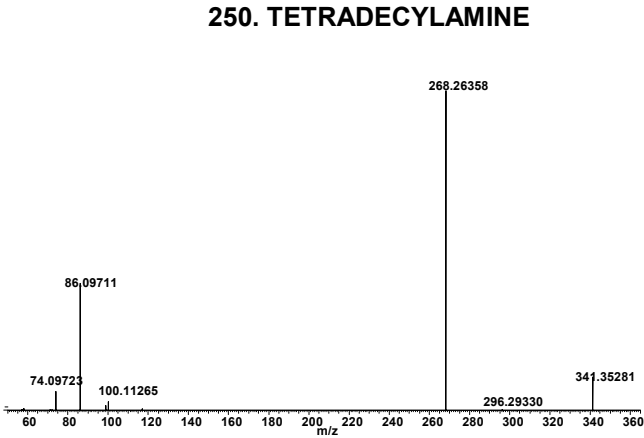

Supplement: d2ay01108e2.pdf [file d2ay01108e2.pdf]
