# Supplementary material for: Analysis of endogenous metabolites using multifunctional derivatization and capillary RPLC-MS
Source: Royal Society of Chemistry journal article supplement (doi:10.1039/d2ay01108e), 2022-01-01
Supplement: d2ay01108e1.pdf [file d2ay01108e1.pdf]

Supporting Information Analytical Methods

### **Analysis of Endogenous Metabolites using Multifunctional Derivatization and Capillary RPLC-MS**

Julius Agongo,<sup>\*a</sup> Michael Armbruster<sup>b</sup>, Christopher Arnatt<sup>c</sup> and James Edwards<sup>d</sup>

Department of Chemistry and Biochemistry, Saint Louis  
University,  
3501 Laclede Ave, St Louis, MO, 63103, USA

#### Contents

|                                                                                                                                    |        |
|------------------------------------------------------------------------------------------------------------------------------------|--------|
| Figure S-1: Reconstructed Ion Chromatogram for 250 derivatized Metabolites standards.....                                          | S1-S2  |
| Figure S-2: Reconstructed Ion Chromatogram for 107 derivatized Metabolite targeted in Bovine aortic endothelial cells (BAECs)..... | S2-S3  |
| Figure S-3: Reconstructed Ion Chromatogram for 107 derivatized Metabolite targeted in human urine.....                             | S3-S4  |
| Figure S-4: Reconstructed Ion Chromatogram for 107 derivatized Metabolite targeted in human serum.....                             | S4-S5  |
| Figure S-5-27: Reconstructed Fragmentation spectra (MS/MS) for 250 derivatized Metabolites standards.....                          | S5-S27 |
| Table S-1: Metabolite standards (250) derivatized and analyzed.....                                                                | 1-2    |
| Table S-2: Metabolite standards m/z(M-H) untagged and m/z(M+H) derivatized.....                                                    | 2-3    |
| Table S-3: Targeted Metabolites analysis in BAECs, human urine and human serum.....                                                | 3-4    |
| Table S-4: Comparison of Peak width at half height (second) for capLC-ESI-MS and CE-ESI-MS.....                                    | 4-5    |



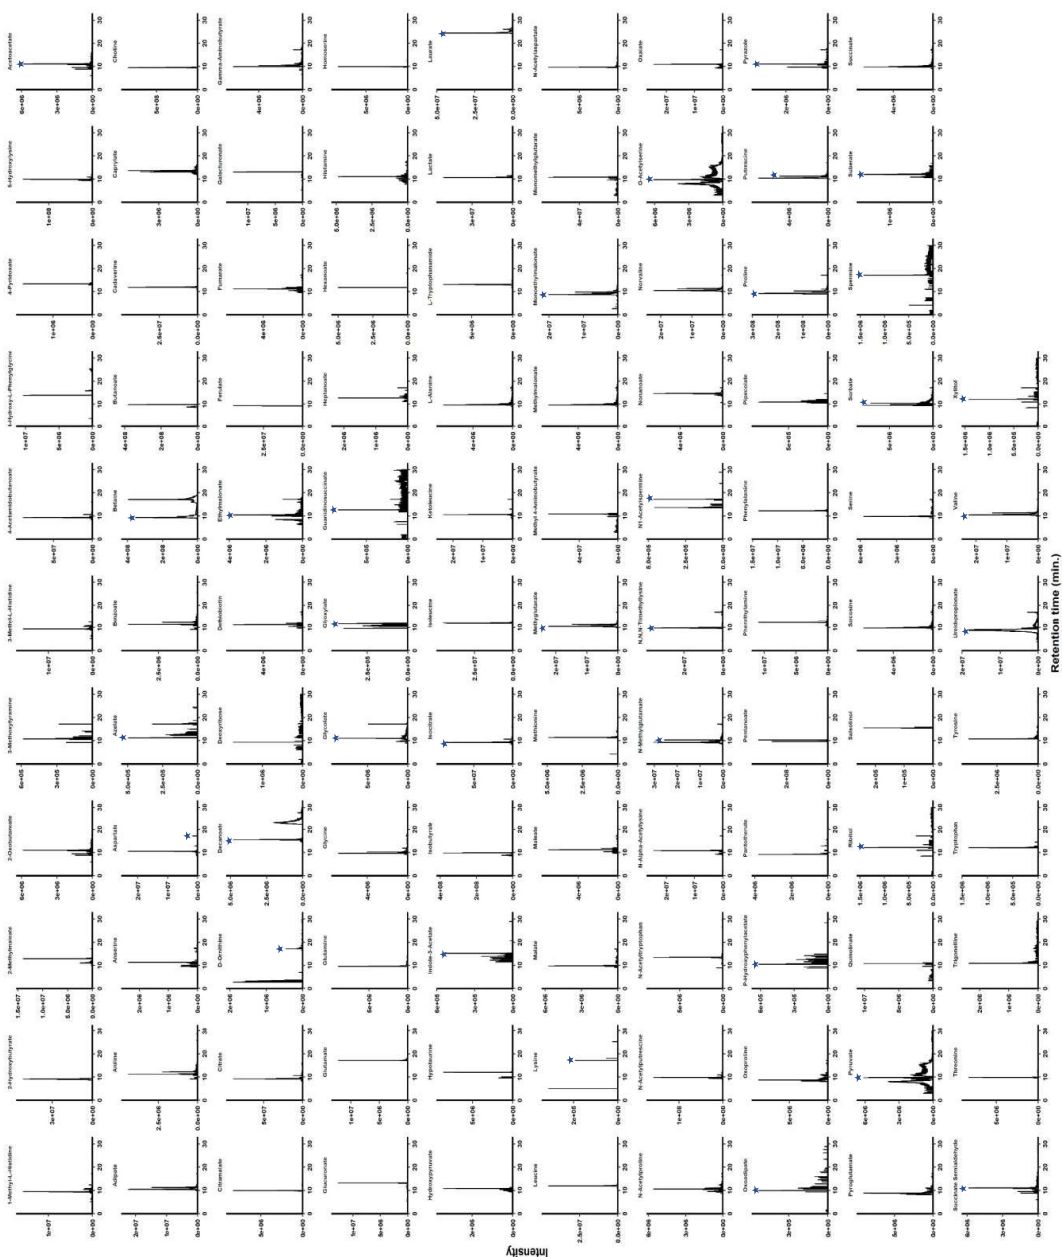

Supplementary Figure 2. Reconstructed Ion Chromatogram for 107 derivatized metabolite targeted in Bovine aortic endothelial cells (BAECs).

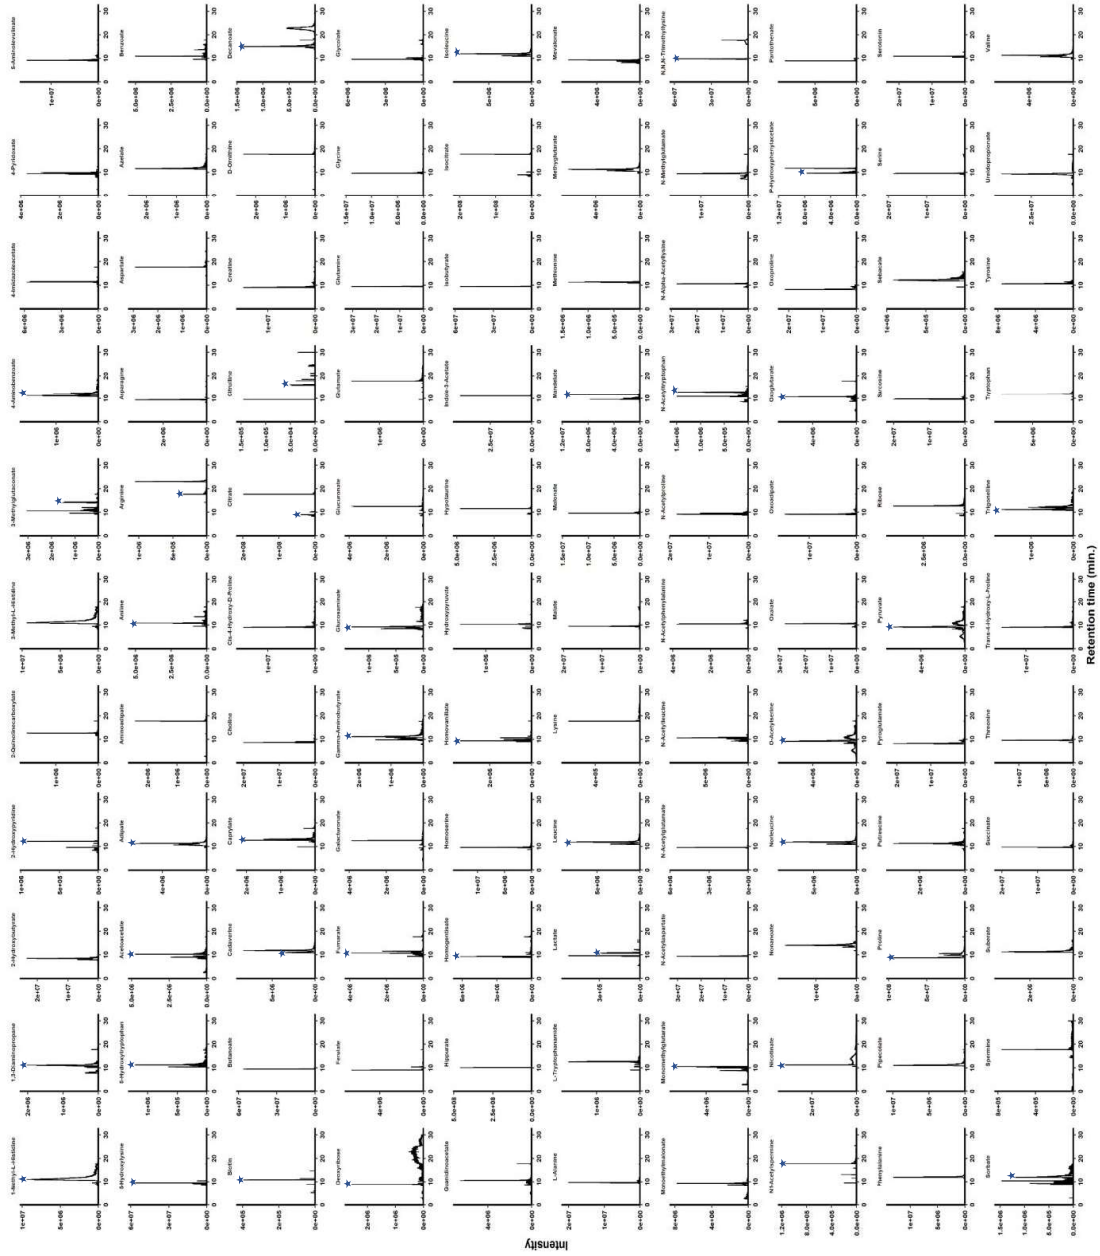

Supplementary Figure 3. Reconstructed Ion Chromatogram for 111 derivatized metabolite targeted in human urine



Supplementary Figure 5. MS/MS spectra for 250 derivatized metabolite standards

1. 6-HYDROXYNICOTINATE

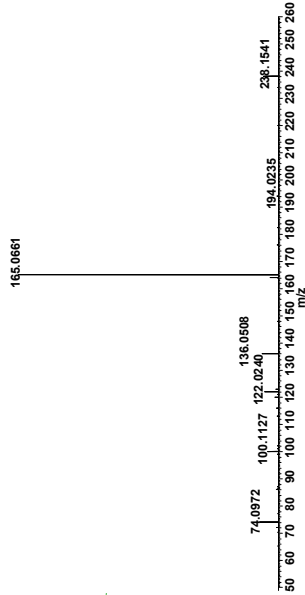

6. MEVALONATE

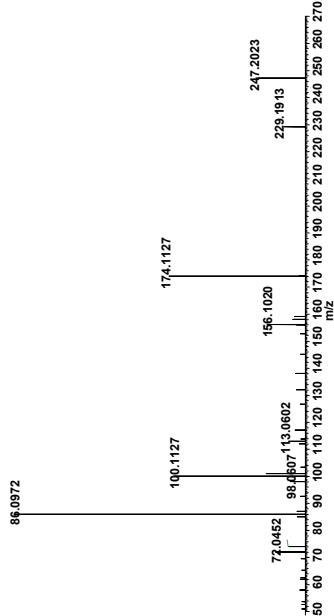

2. PYROGLUTAMATE/OXOPROLINE

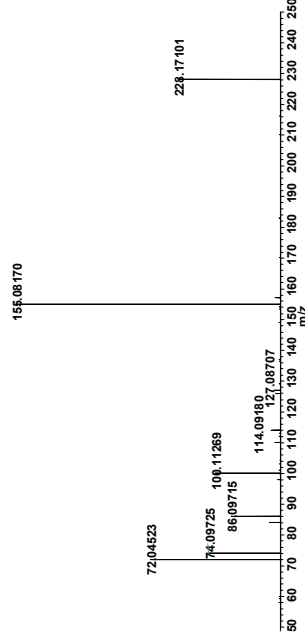

7. CHOLINE

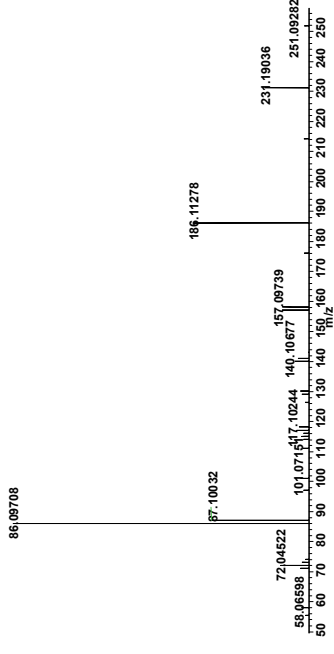

9. PYRIDOXAL

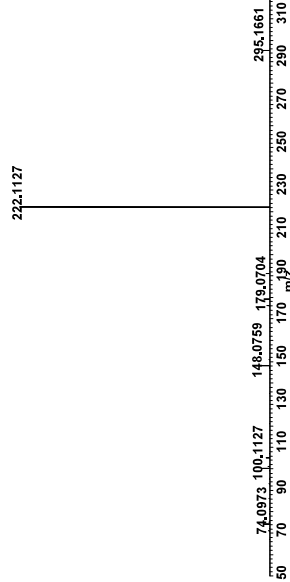

4. RIBITOL/XYLITOL

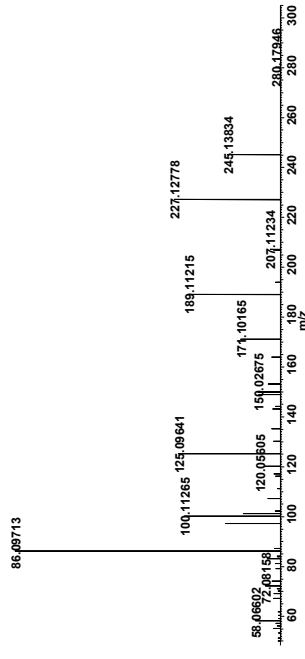

8. GUANIDINOACETATE

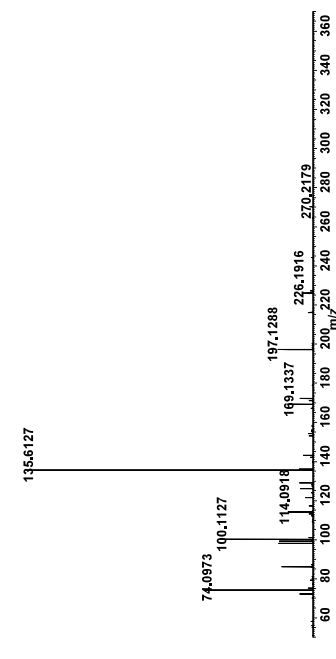

11. PROLINE

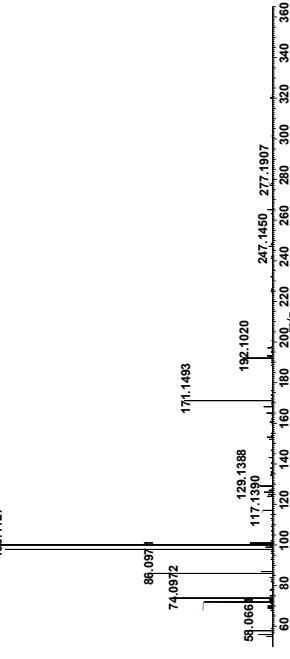

10. HYDROXYKYNURENINE

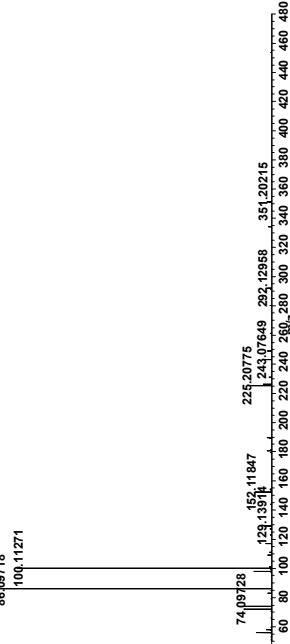

Supplementary Figure 6. MS/MS spectra for 250 derivatized metabolite standards

12. 2/3-ALPHA-HYDROXYISOBUTYRATE

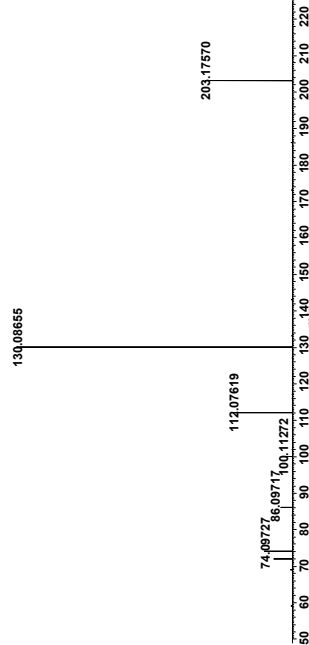

15. PANTOTHENATE

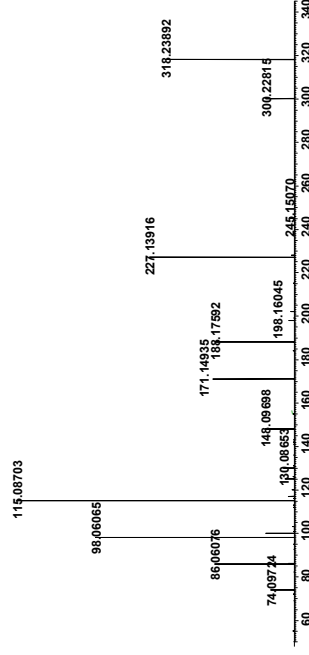

16. GLUCOSAMINATE

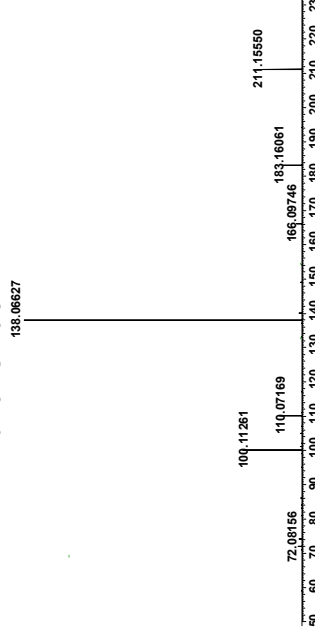

17. 2-OXOBUTANOATE

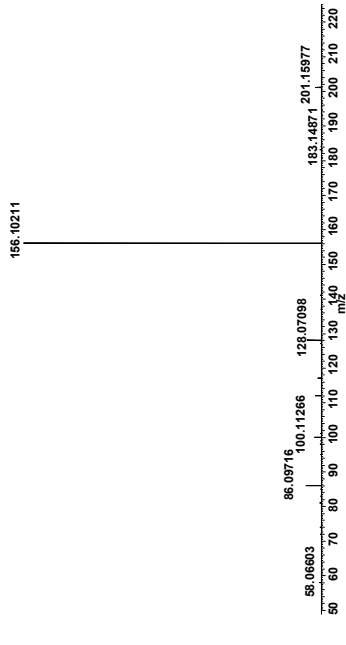

18. CITRATE/ISOCITRATE/4-ACETAMIDOBUTANOATE

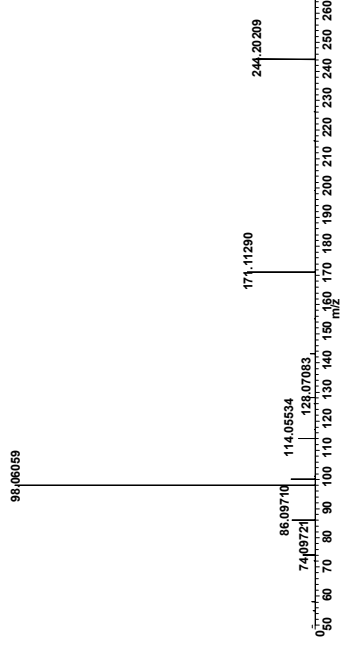

20. UROCANATE

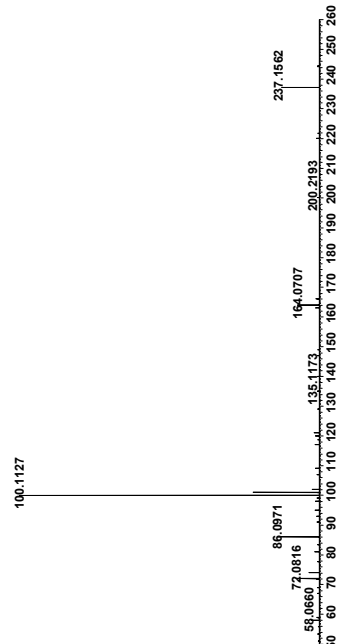

22. N-FORMYLGLYCINE

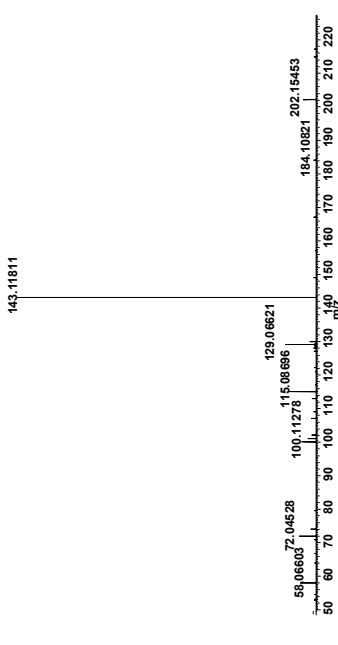

23. N-ACETYLALANINE

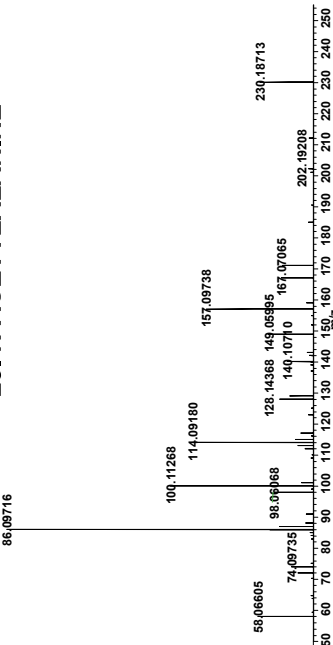

24. N-METHYL PIPERAZINE

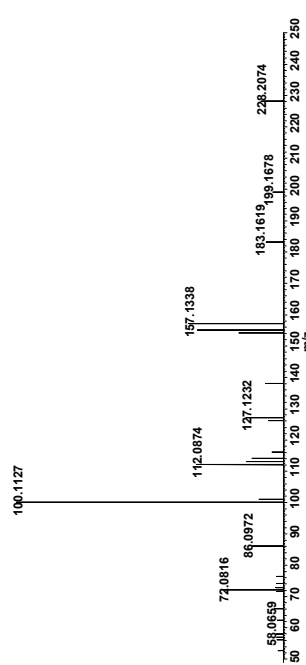

Supplementary Figure 7. MS/MS spectra for 250 derivatized metabolite standards

**25. RIBOSE**

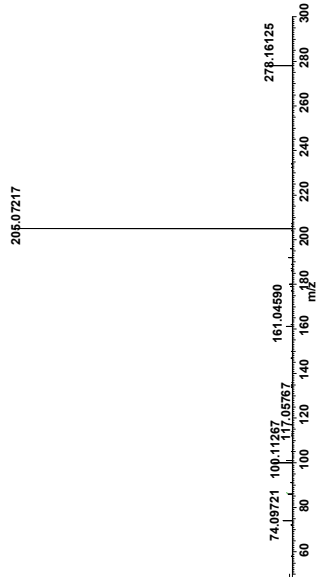

**26. PHENOL**

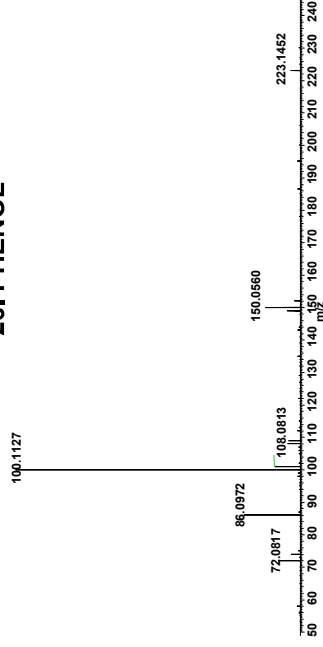

**27. 3-METHYLHISTAMINE**

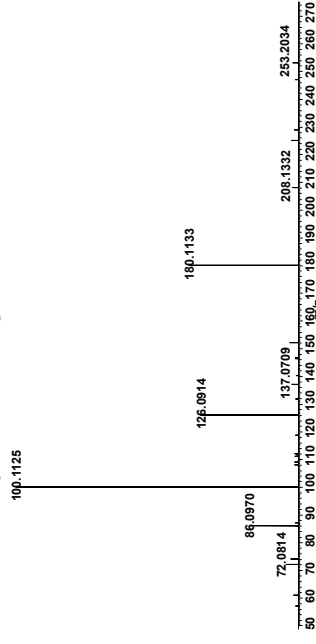

**28. GLYCINE/MALONATE**

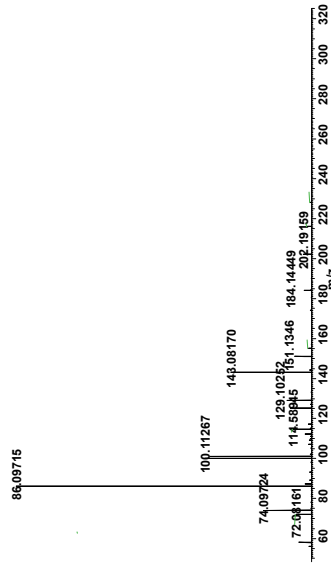

**30. CREATINE**

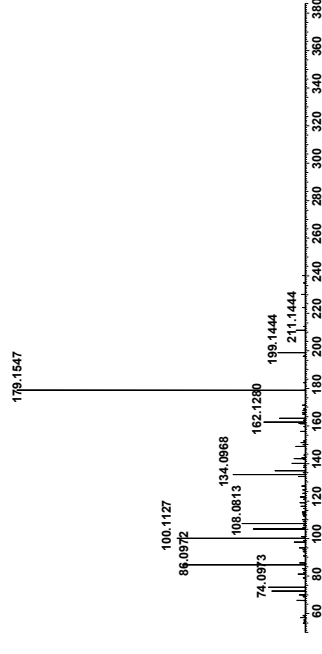

**31. L-ALANINE/SARCOSINE**

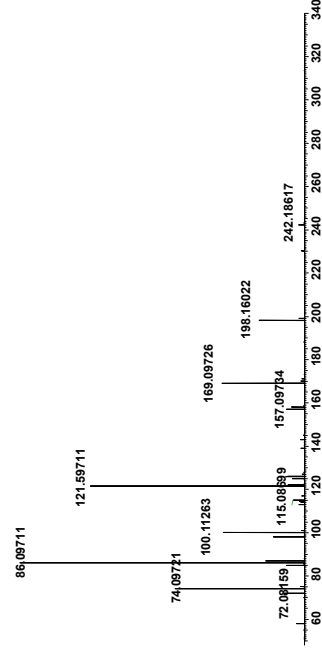

**33. PYRUVATE**

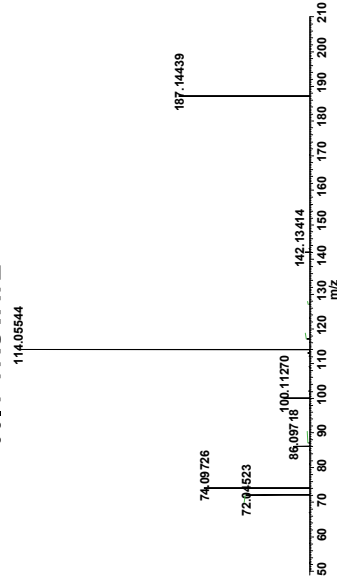

**34. N-ACETYLPROLINE**

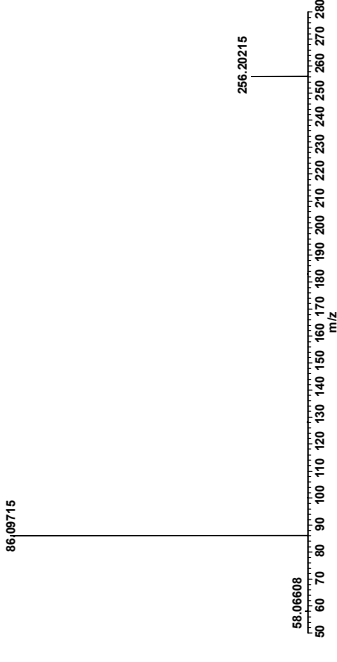

**35. N-METHYL ALANINE**

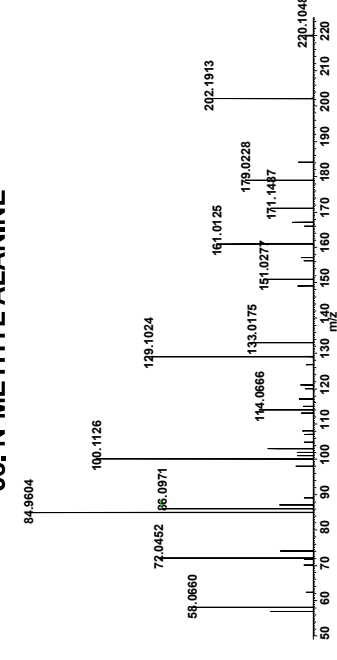



Supplementary Figure 8. MS/MS spectra for 250 derivatized metabolite standards

**36. UREIDOPROPIONATE**

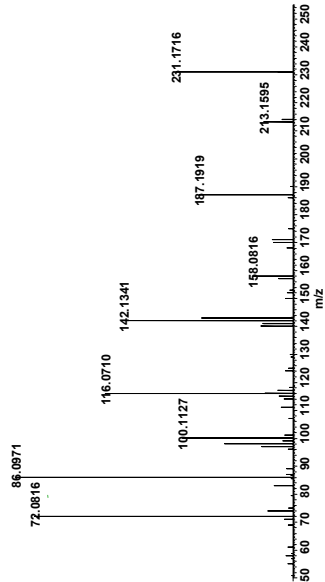

**37. N-METHYLGLUTAMATE**

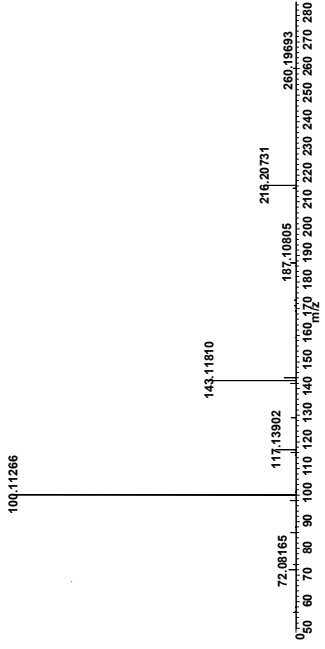

**38. 3-AMINO-5-HYDROXYBENZOATE**

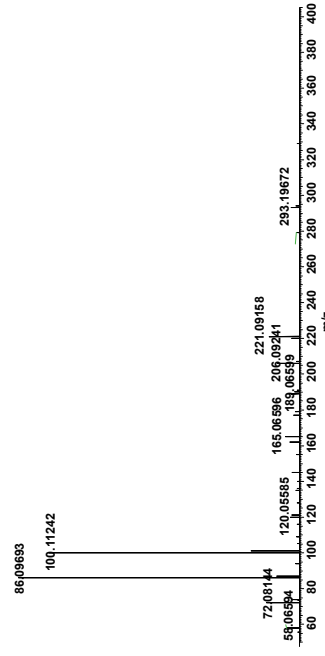

**39. CIS/TRANS-4-HYDROXY-L-PROLINE**

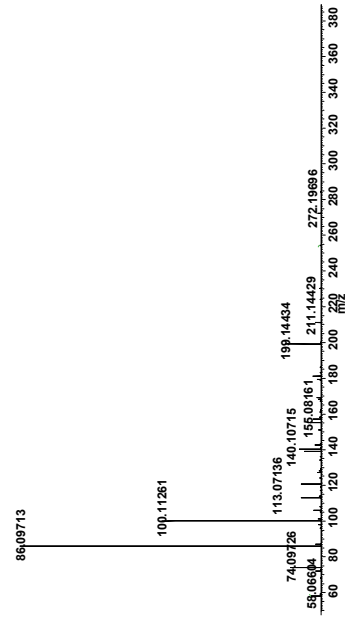

**41. BETAIN**

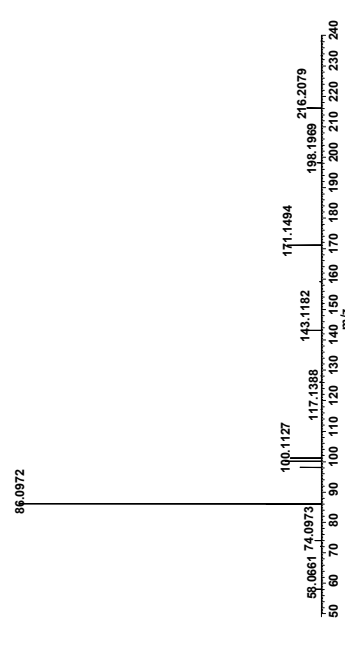

**42. N,N-DIMETHYL-1,4-PHENYLENEDIAMINE**

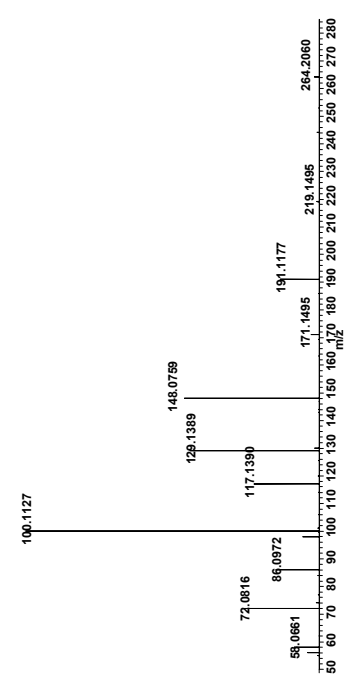

**43. HISTIDINOL**

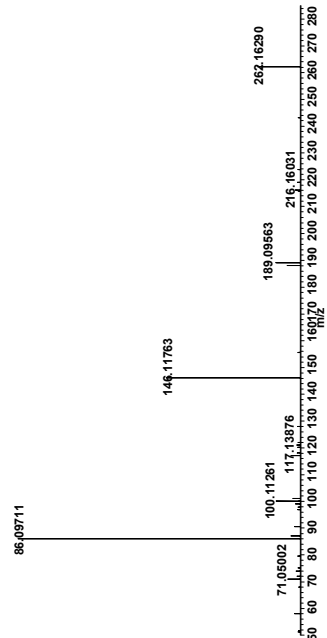

**44. DEOXYRIBOSE**

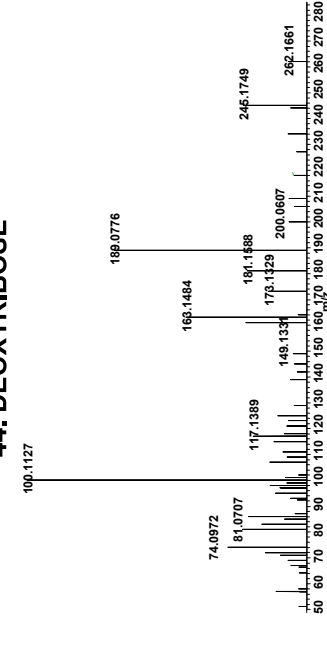

**45. OPHTHALMATE**

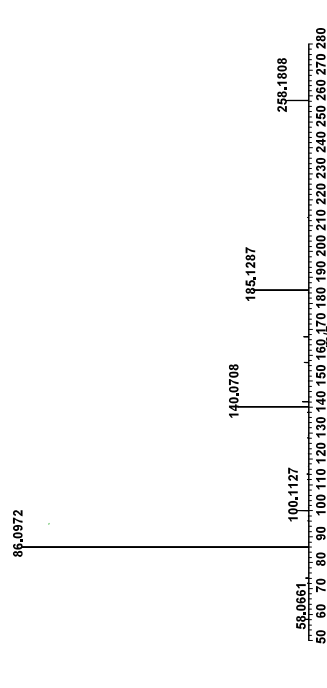

Supplementary Figure 9. MS/MS spectra for 250 derivatized metabolite standards

**46. OXOGLUTARATE**

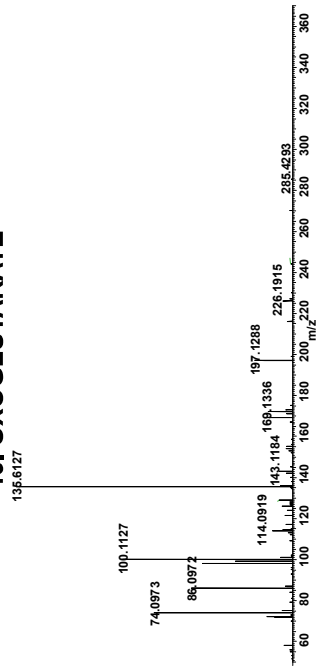

**47. ASPARAGINE/GLY-GLY**

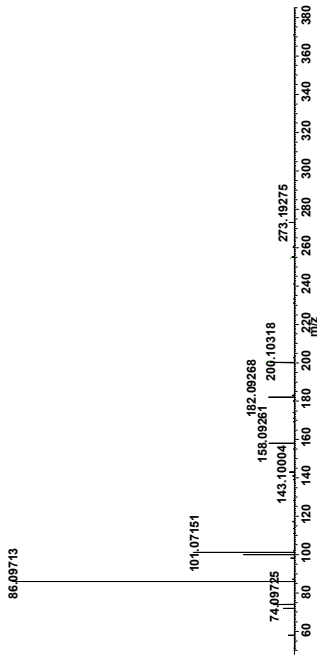

**49. MONOETHYLMALONATE**

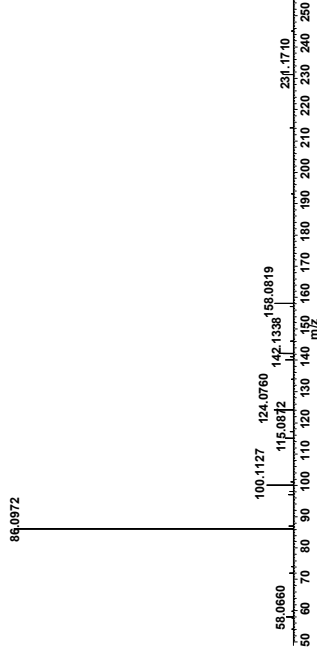

**50. SERINE/MALATE**

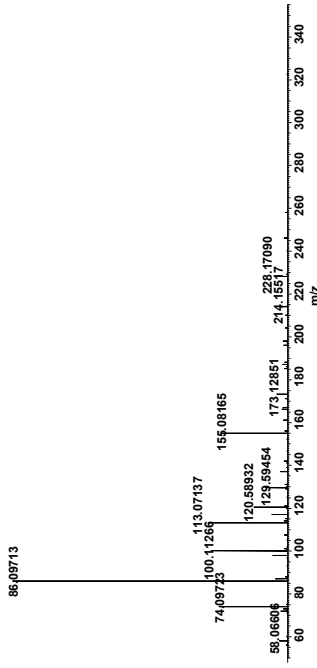

**52. N-ACETYLPUTRESCINE/ 5-HYDROXYLYSINE**

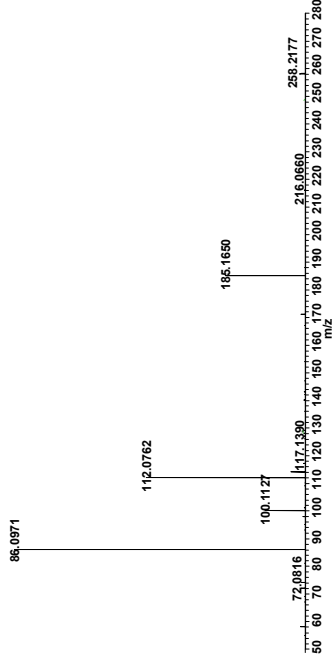

**54. GLUTAMINE/N-ACETYLASPARTATE**

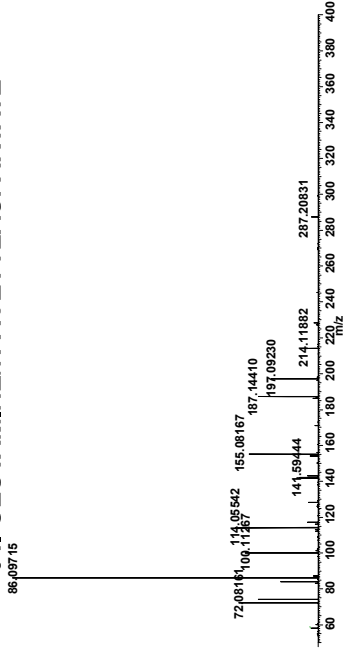

**56. ISOBUTYRATE/BUTANOATE**

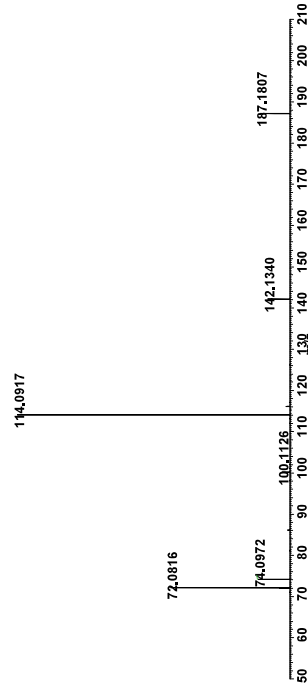

**58. THREONINE/ALLOTHREONINE/HOMOSERINE**

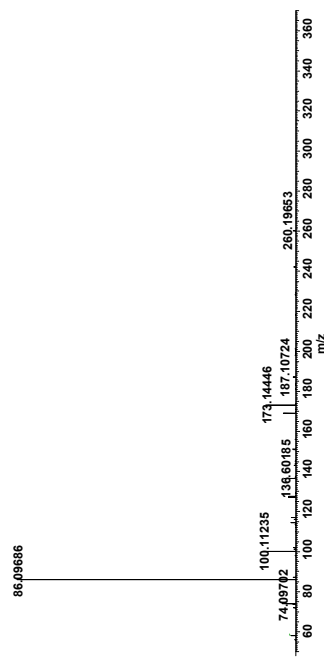

**61. SUCCINATE**

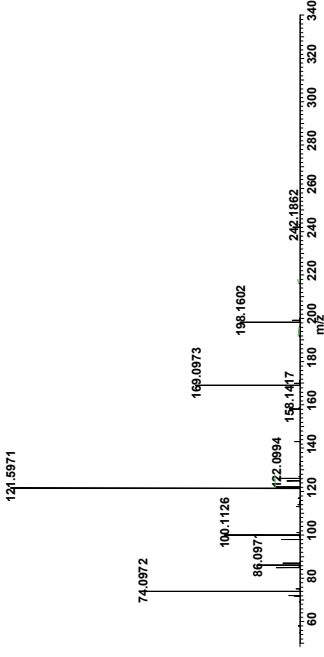

Supplementary Figure 10. MS/MS spectra for 250 derivatized metabolite standards

**62. N-ACETYLGLYCINE**

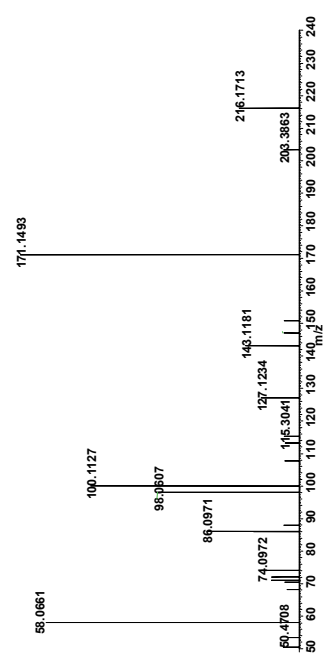

**63. HOMOVANILLATE/ HYDROXYPHENYLLACTATE**

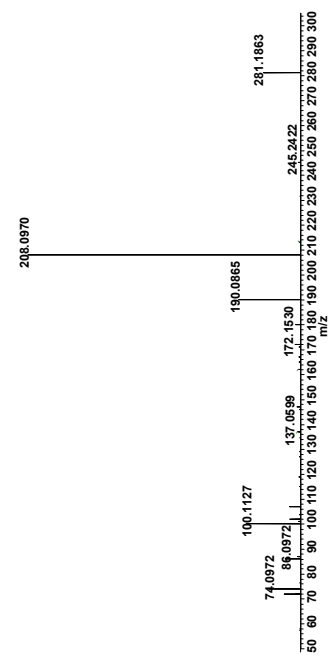

**65. N,N,N-TRIMETHYLLYSINE**

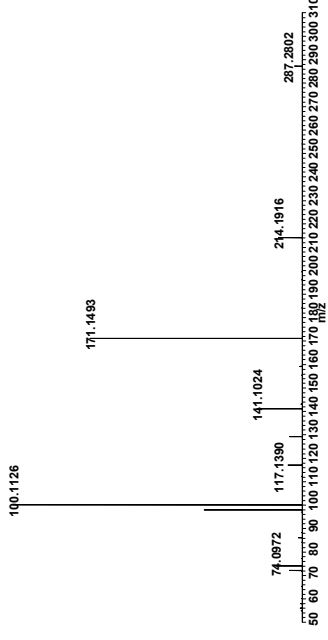

**66. BIOTIN**

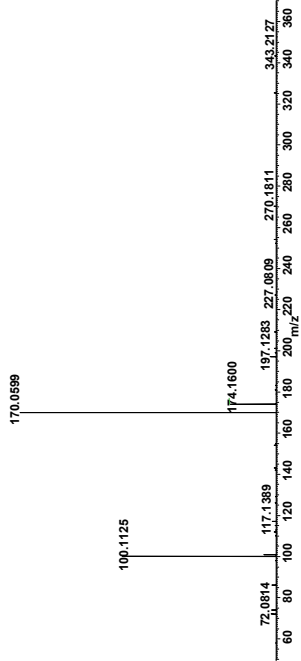

**67. 2-HYDROXYPYRIDINE**

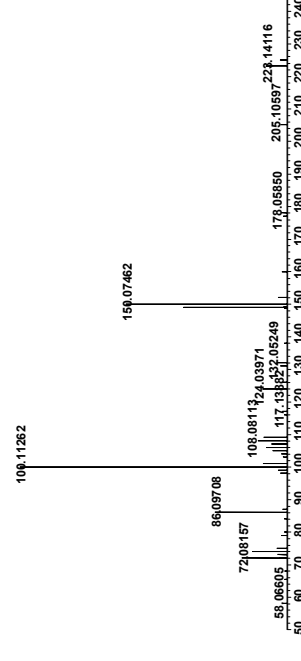

**68. 1/3-METHYL-L-HISTIDINE**

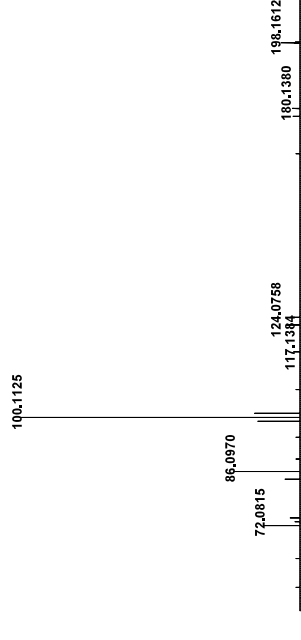

**70. GLUTARATE/ETHYLMALONATE**

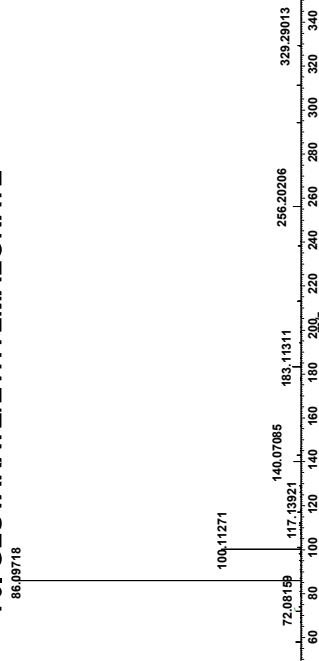

**72. GLYCOLATE**

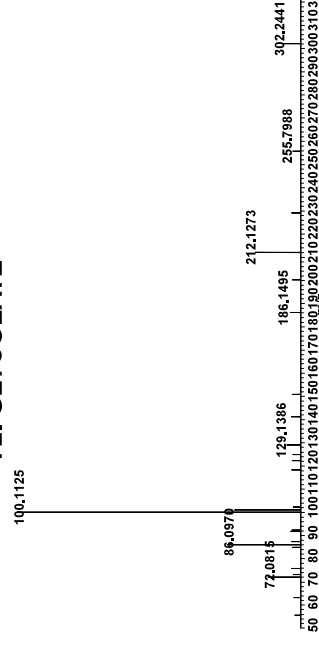

**73. 1-ISOPROPYL PIPERAZINE**

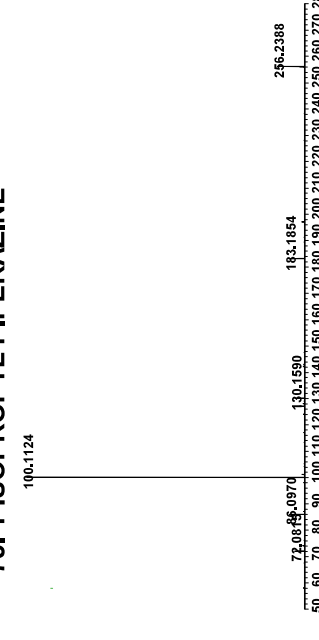

Supplementary Figure 11. MS/MS spectra for 250 derivatized metabolite standards

**74. BUTYLAMINE/ PENTANOATE**

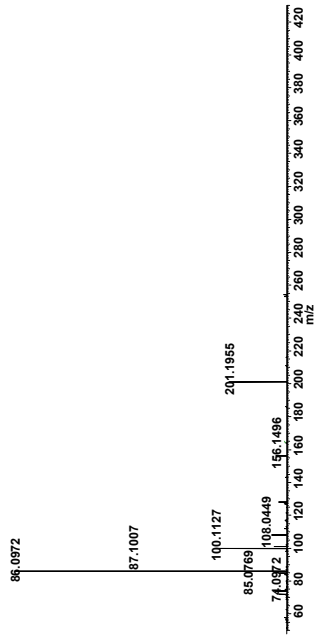

**76. DETHIOBIOTIN/MALEATE**

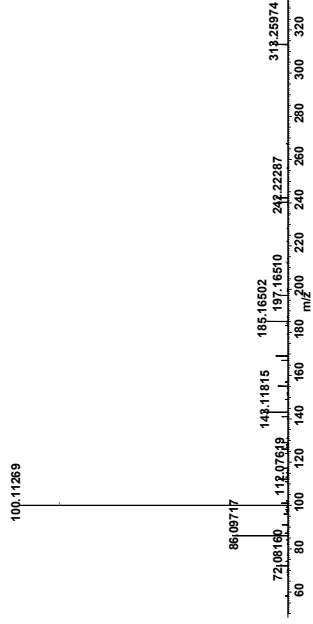

**78. O-ACETYL CARNITINE**

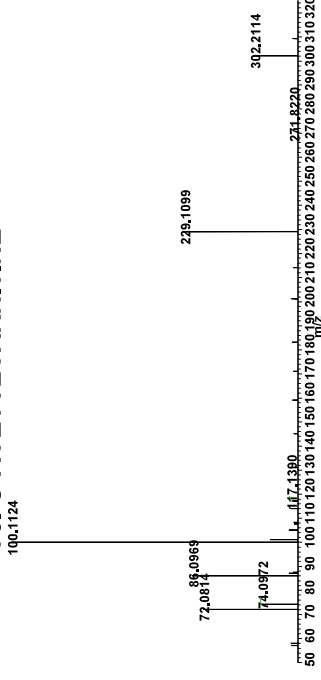

**79. HIPPURATE**

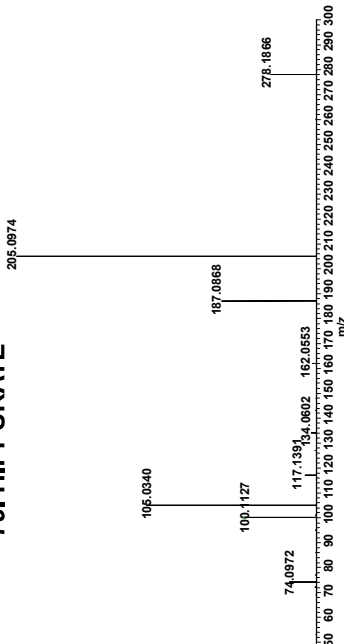

**80. SORBITOL/ GALACTITOL**

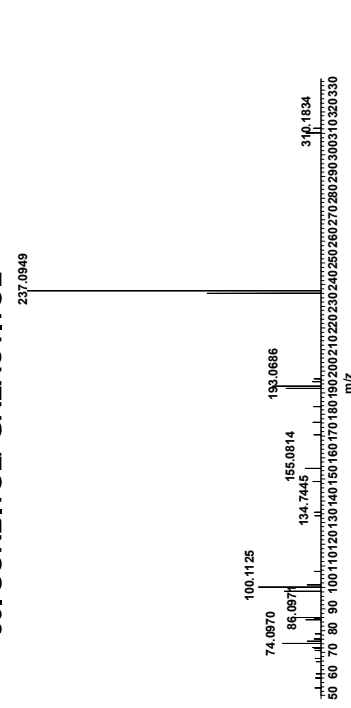

**82. 1,3-DIAMINOPROPANE/AMINOISOBUTANOATE**

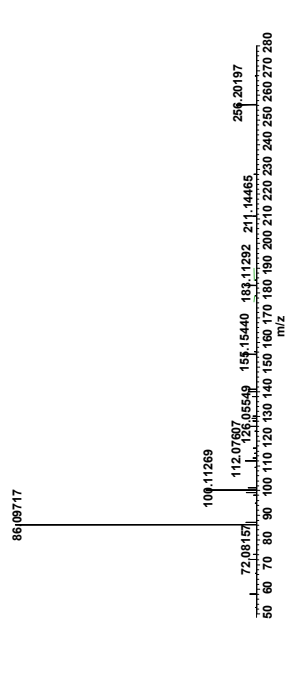

**84. N-ACETYL SERINE/ O-ACETYL SERINE**

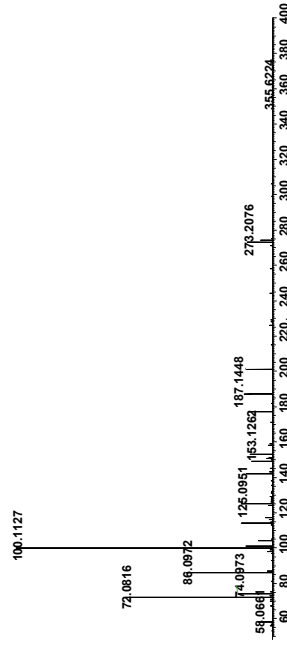

**86. GLYOXYLATE**

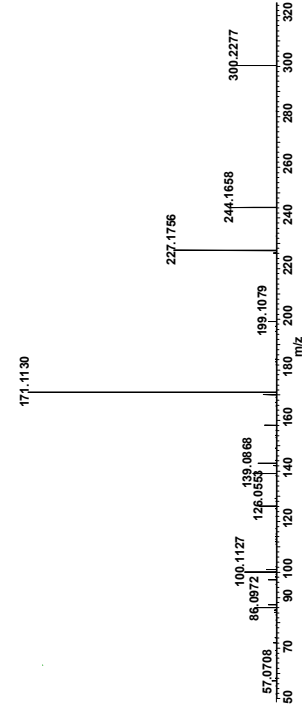

**87. DEOXYCARNITINE**

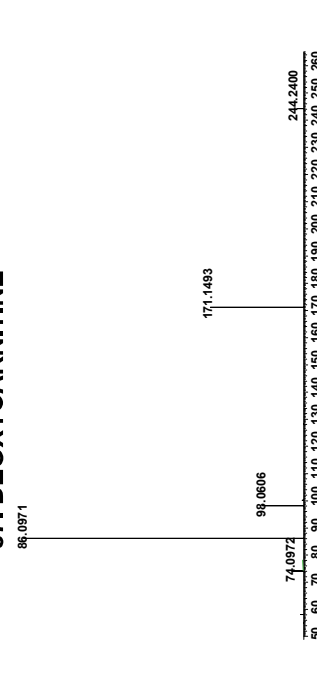

Supplementary Figure 12. MS/MS spectra for 250 derivatized metabolite standards

88. GAMMA-AMINO BUTYRATE/2-AMINOISOBUTYRATE

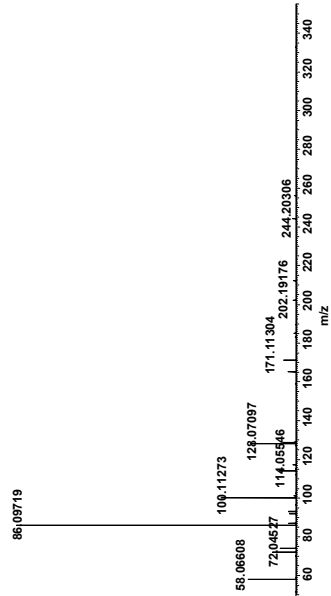

90. CADAVERINE

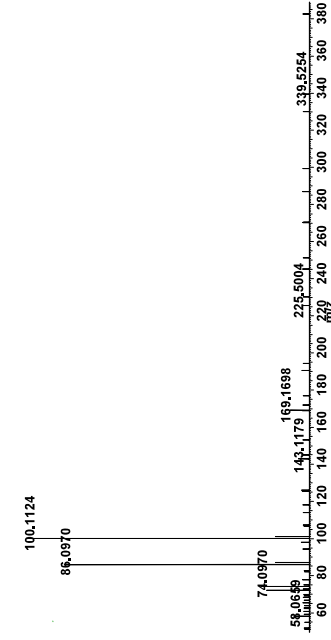

91. HISTAMINE

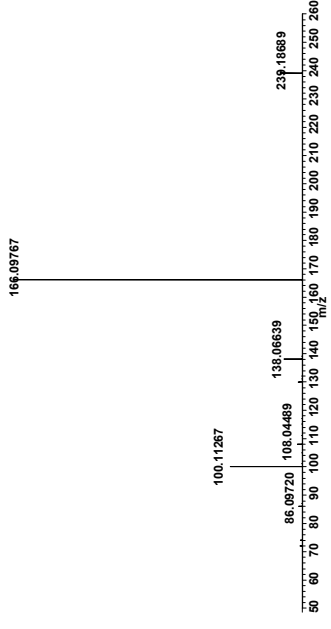

N-ACETYLPUTRESCINE

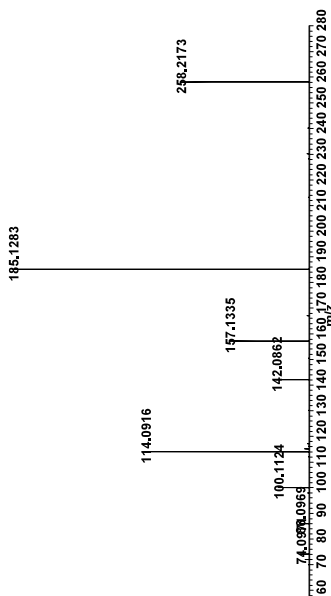

93. QUINATE

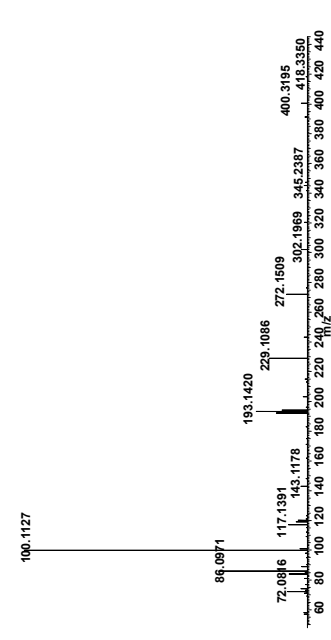

94. FERULATE

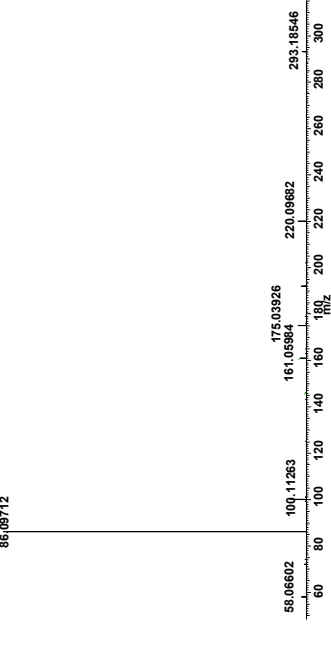

95. METHYLMALONATE

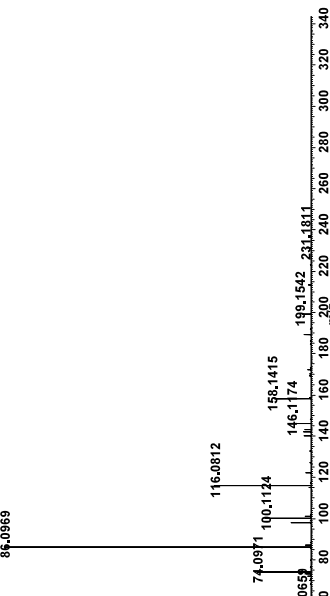

96. METHYL 4-AMINO BUTYRATE/ MONOMETHYLGLUTARATE

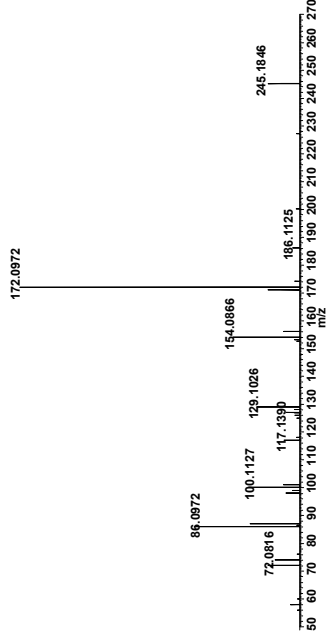

98. 3-AMINO-4-HYDROXYBENZOATE

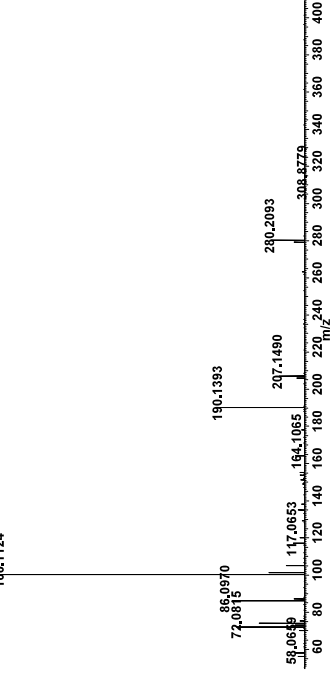

Supplementary Figure 13. MS/MS spectra for 250 derivatized metabolite standards

99. QUINOLINATE

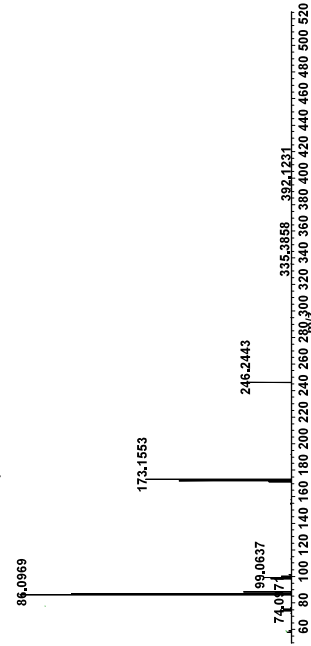

100. 3,4 DIHYDROXYMANDELATE

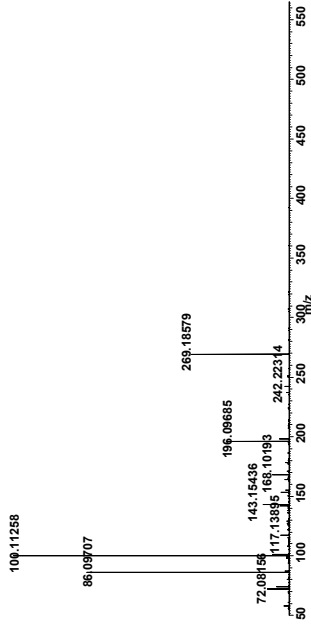

101. SEROTONIN

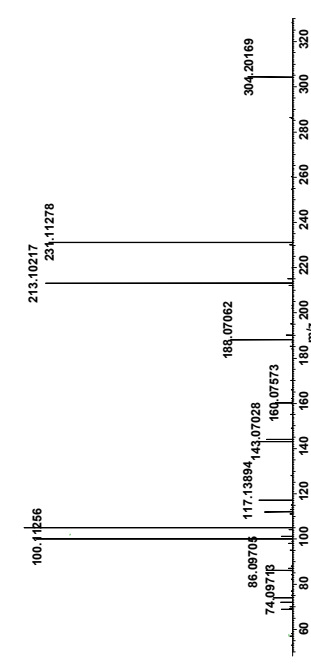

101. HYDROXYPYRUVATE

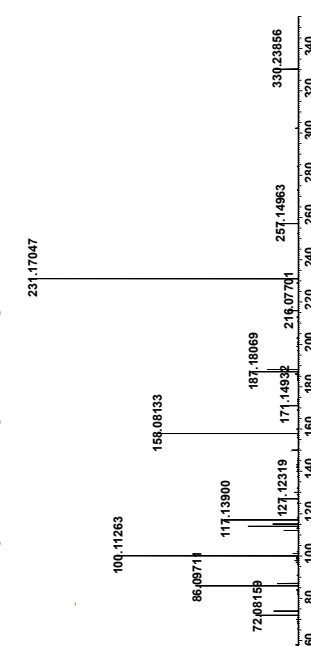

102. ERYTHRITOL

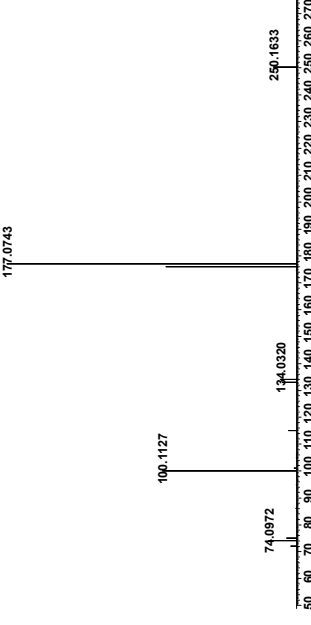

103. N-(3-AMINOPROPYL)PIPERIDNE

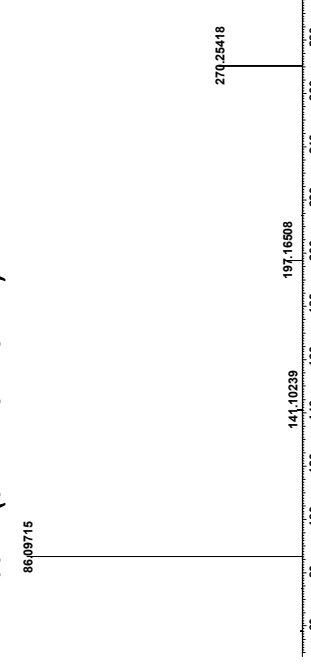

104. PYRAZOLE

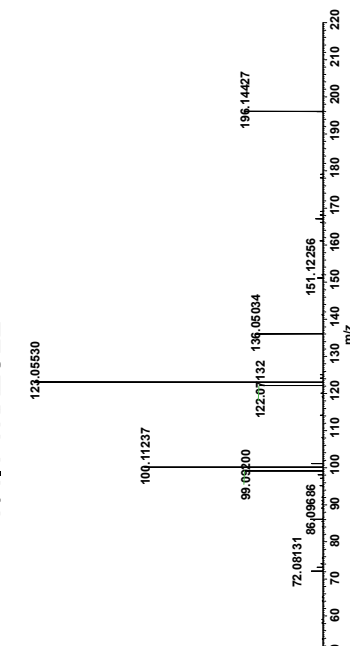

105. 2-QUINOLINECARBOXYLATE

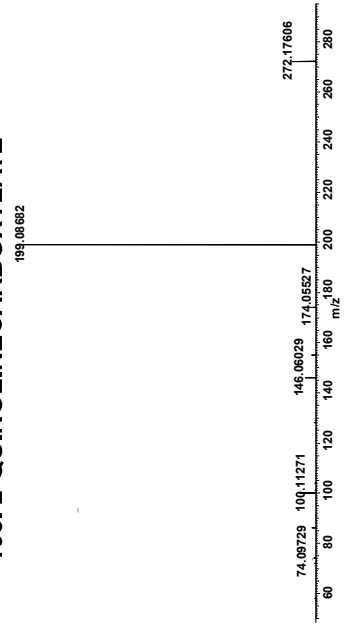

106. 5-AMINOLEVULINATE

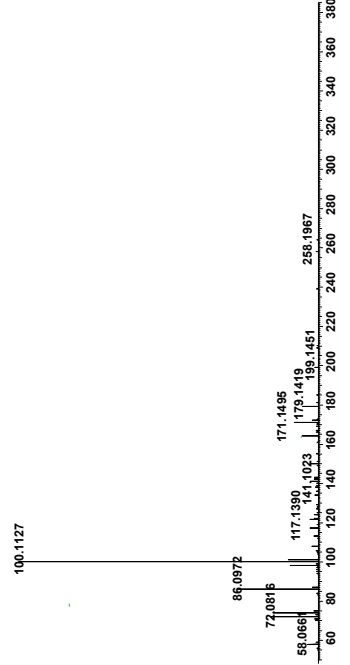

Supplementary Figure 14. MS/MS spectra for 250 derivatized metabolite standards

107. OXALATE/N-ALPHA-ACETYLLYSINE

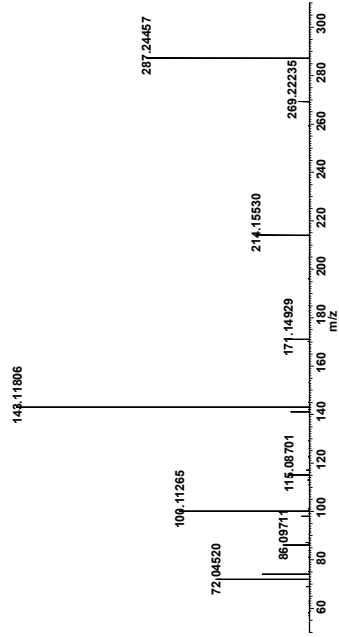

109. LACTATE

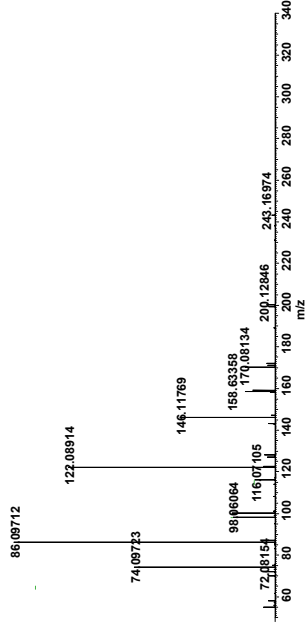

110. TYROSINE

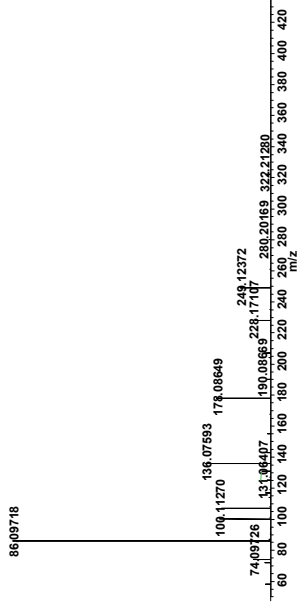

111. NICOTINATE

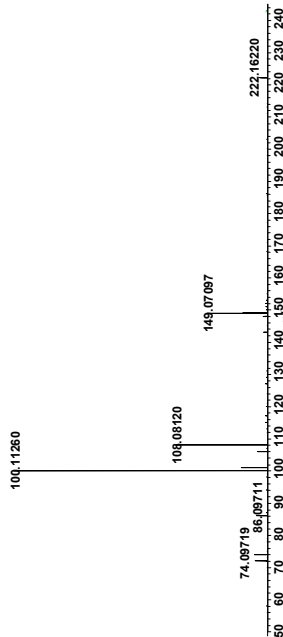

112. VALINE/NORVALINE

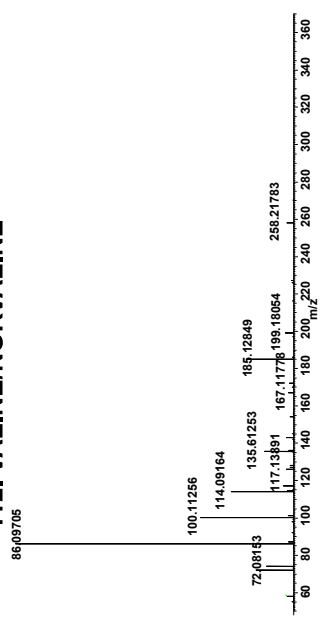

114. DIHYDROXYFUMARATE

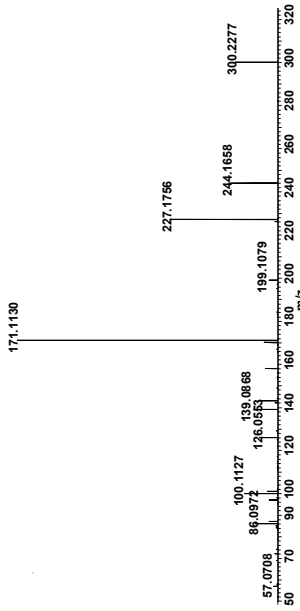

116. SUBERATE

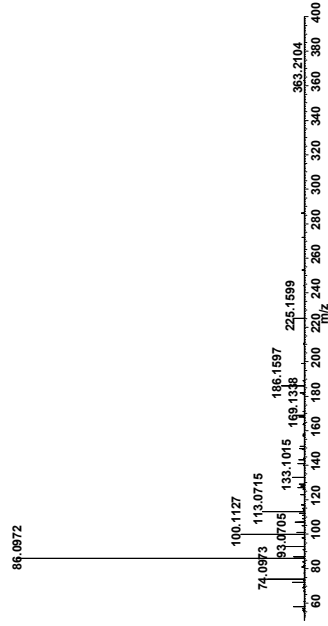

117. ACETOACETATE/SUCCINATE SEMIALDEHYDE

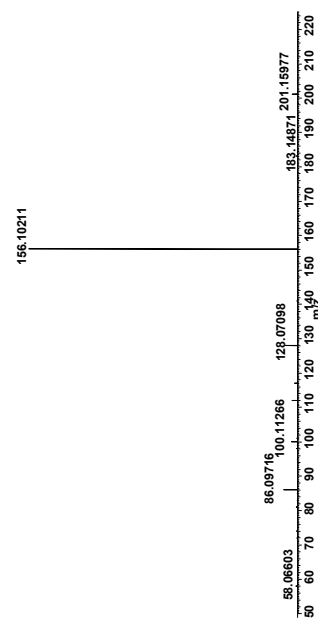

119. 3-METHOXYTYROSINE

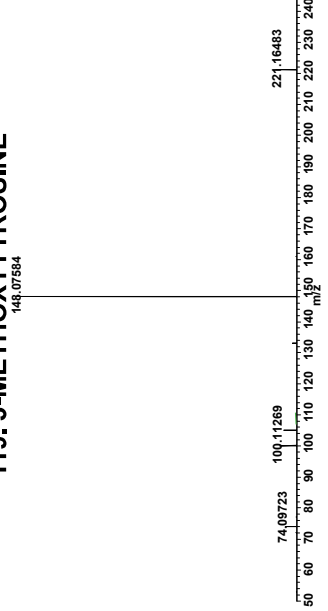

Supplementary Figure 15. MS/MS spectra for 250 derivatized metabolite standards

**120. HOMOCYSTINE**

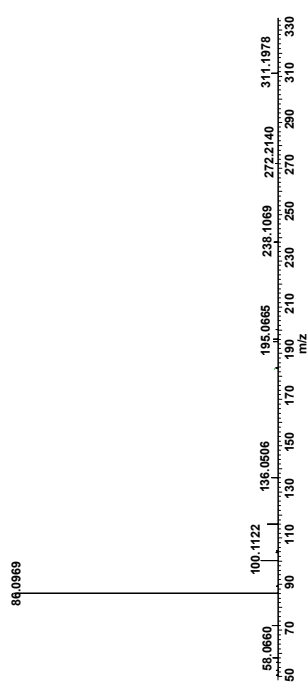

**123. HOMOGENITISATE**

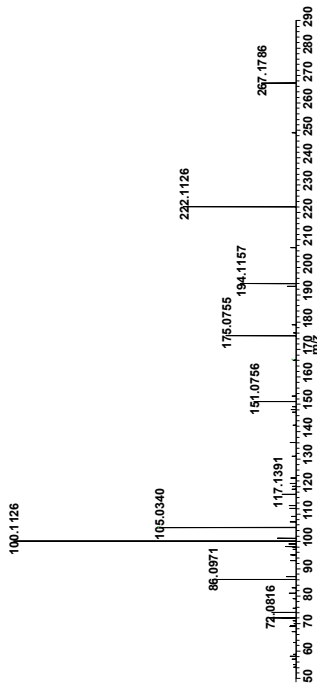

**126. N-ACETYLPHENYLALANINE**

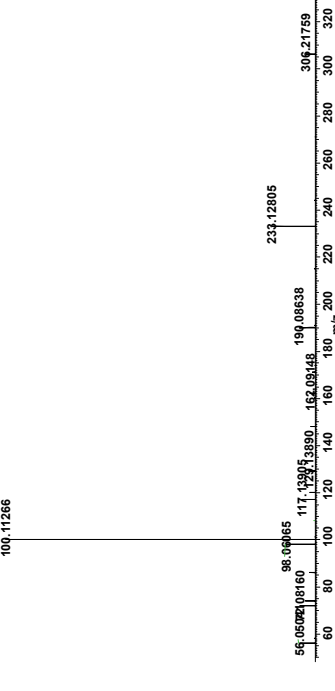

**121. FUMARATE**

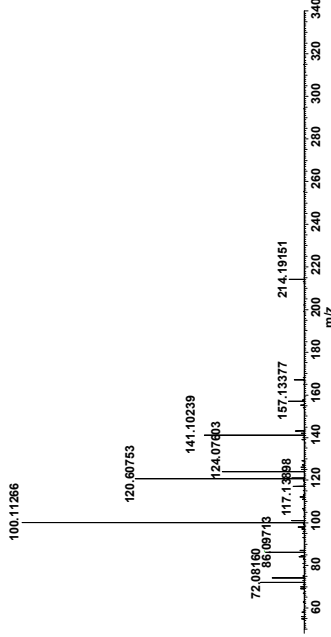

**124. 5-HYDROXYTRYPTOPHAN**

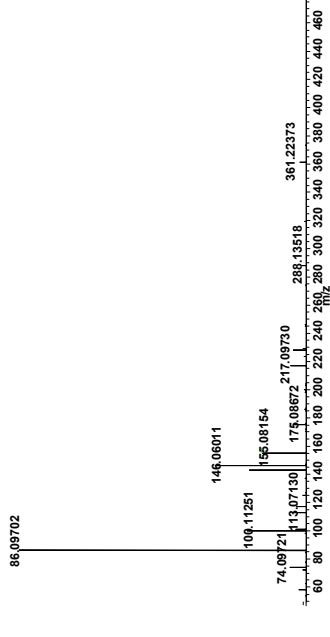

**127. L-DOPA**

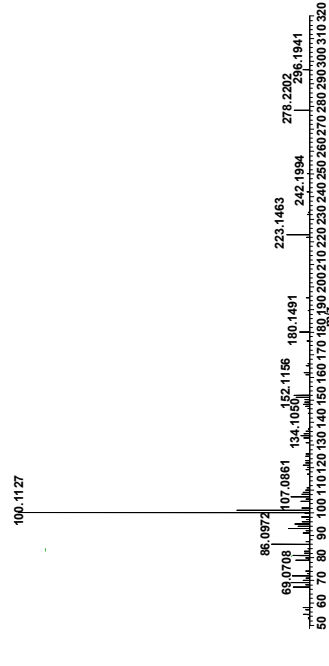

**122. 4-FORMYL BENZOIC ACID**

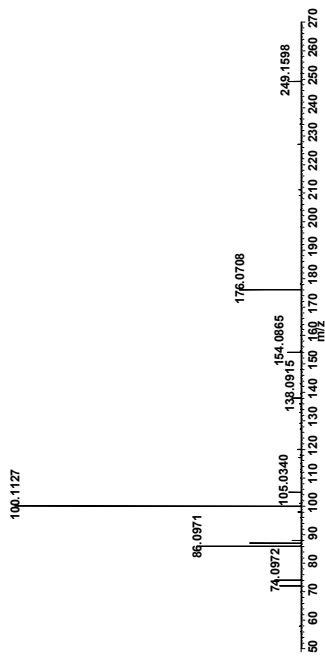

**125. KETOLEUCINE**

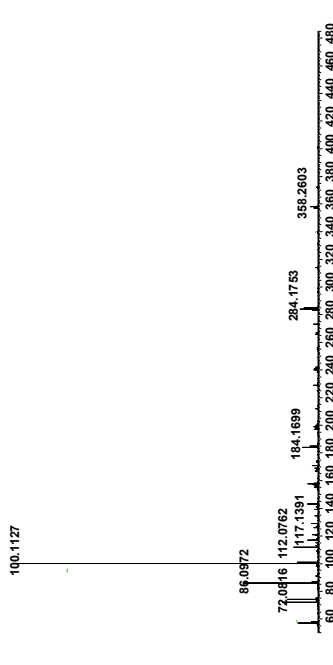

**128. OXOADIPATE**

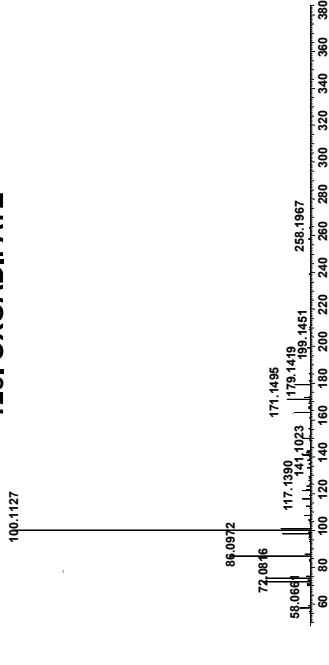



Supplementary Figure 16. MS/MS spectra for 250 derivatized metabolite standards

**129. EPINEPHRINE/NORMETANEPHRINE**

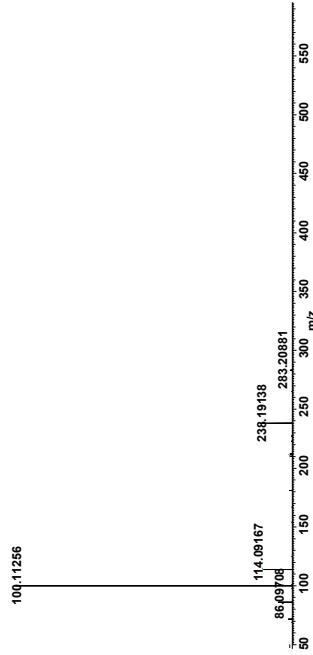

**133. PUTRESCINE**

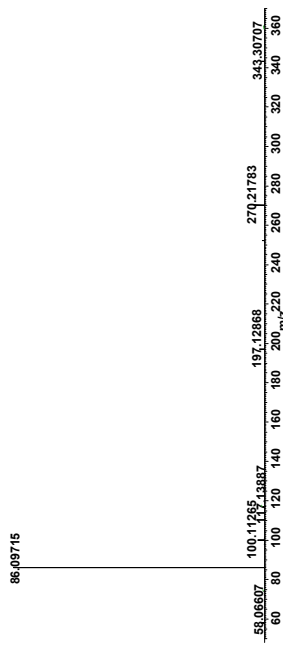

**131. 2-METHYLMALEATE**

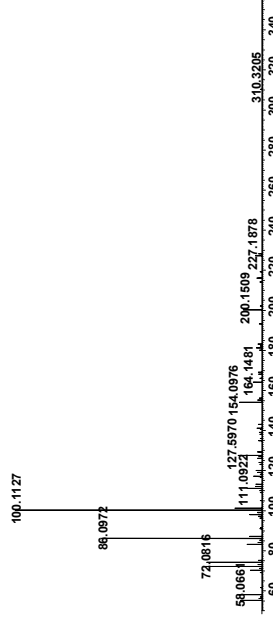

**134. 2-NITROBENZOIC ACID**

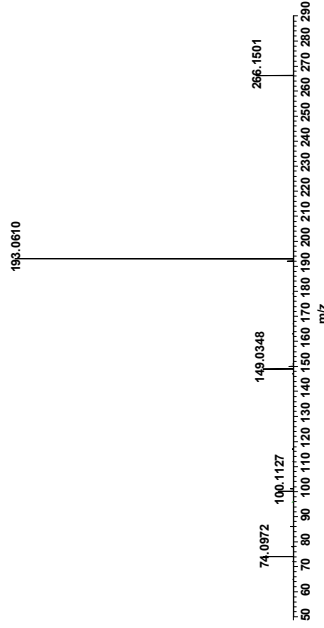

**136. PHENYLETHANOLAMINE**

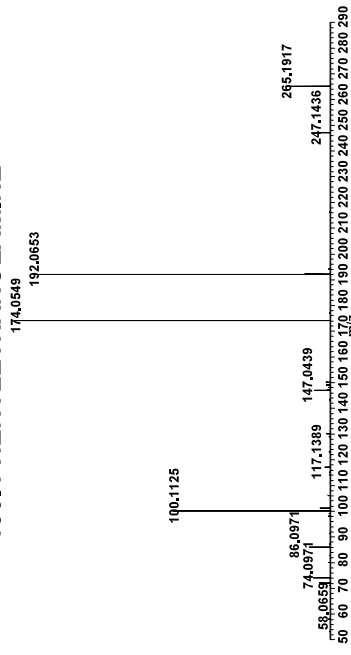

**132. N-ACETYLLEUCINE**

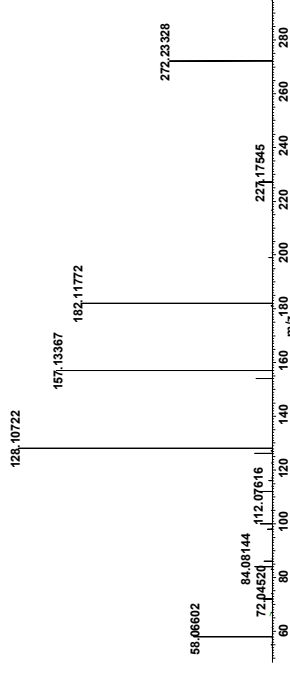

**135. 1-HYDROXY-2-NAPHTHOATE**

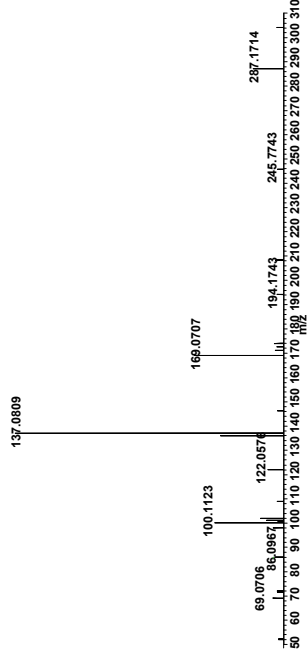

**137. 3-(2-HYDROXYPHENYL)PROPANOATE**

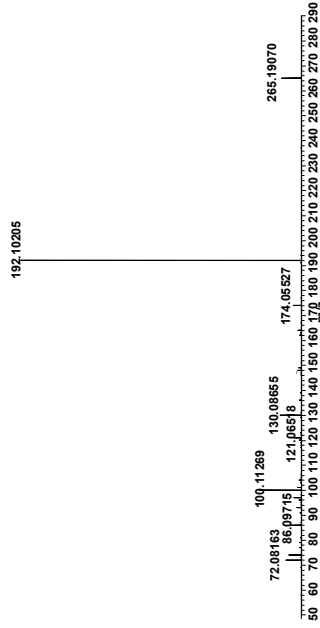

**138. SORBATE**

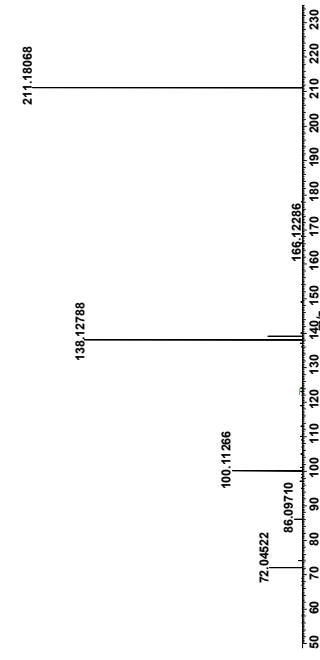

Supplementary Figure 17. MS/MS spectra for 250 derivatized metabolite standards

139. CITRAMALATE

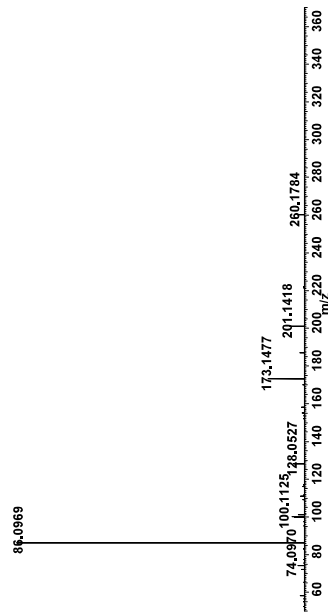

140. 2-AMINOPHENOL

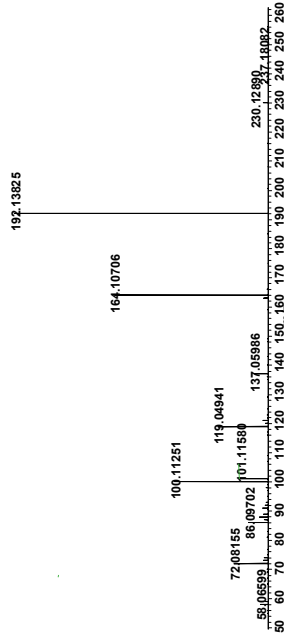

141. 1-(2-AMINOETHYL)PIPERIDINE

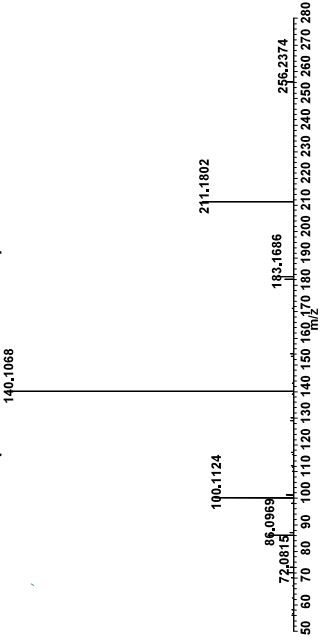

142. BENZOATE/ANILINE

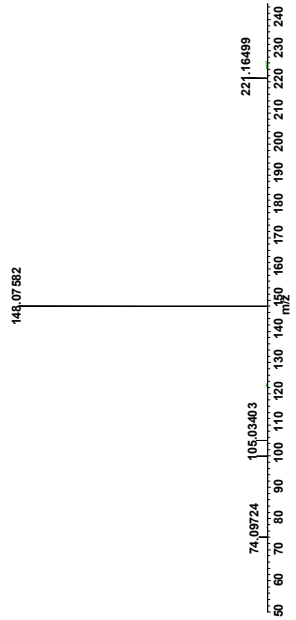

144. 3-METHOXYTYRAMINE

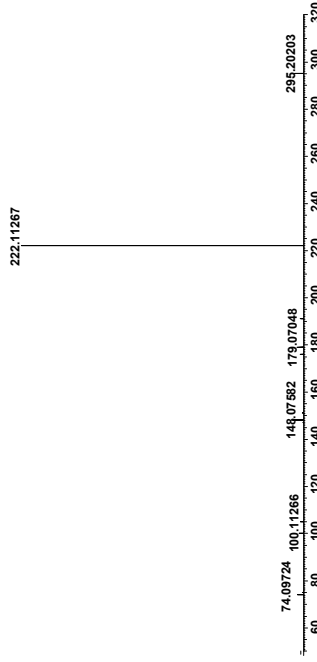

145. PHENYLALANINE

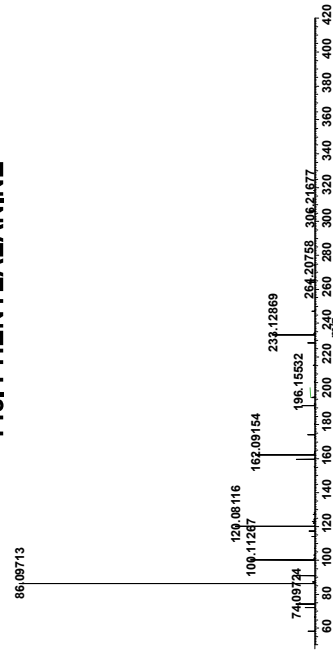

146. METHIONINE

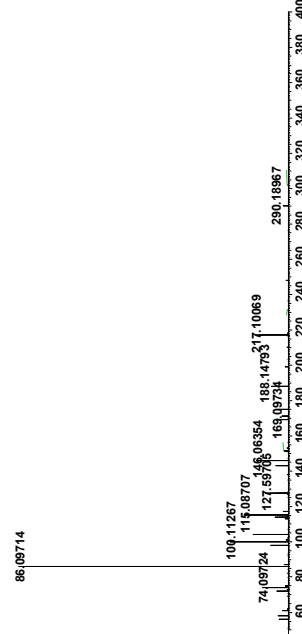

147. 5-AMINOPENTANOATE/2-METHYLGUTARATE/ADIPATE

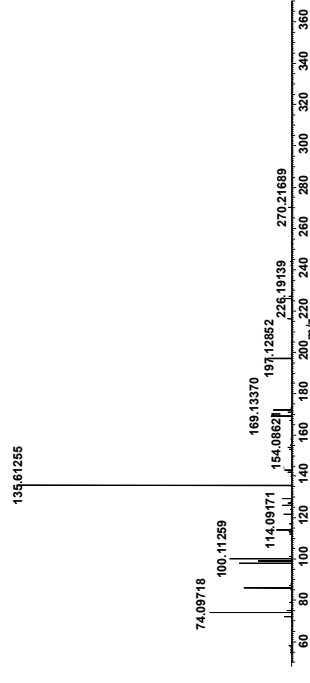

150. AZELATE

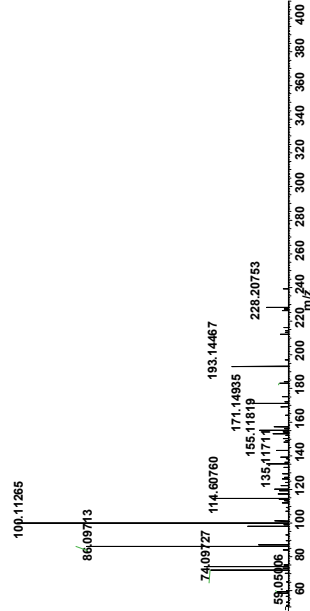

Supplementary Figure 18. MS/MS spectra for 250 derivatized metabolite standards

**151. ACETOIN**

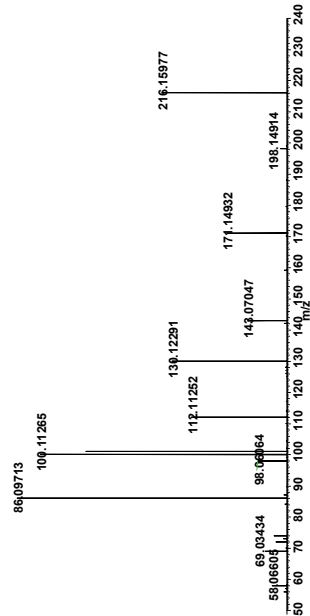

**152. 2,4-PYRIDINEDIACARBOXYLIC ACID**

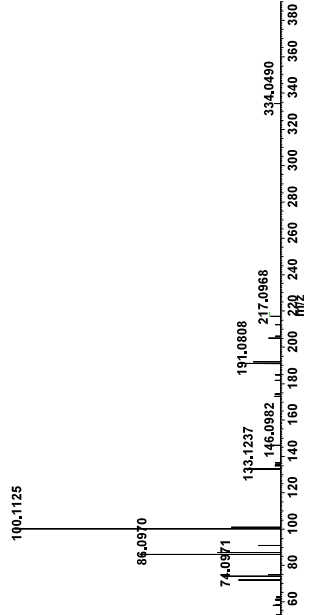

**153. INDOLE-3-ACETATE**

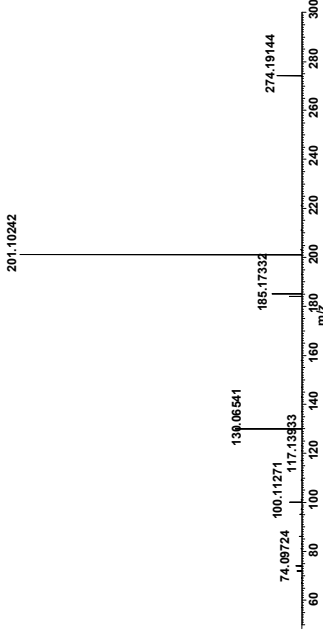

**154. D-MANNOSAMINE/GLUCOSAMINE/GALACTOSAMINE**

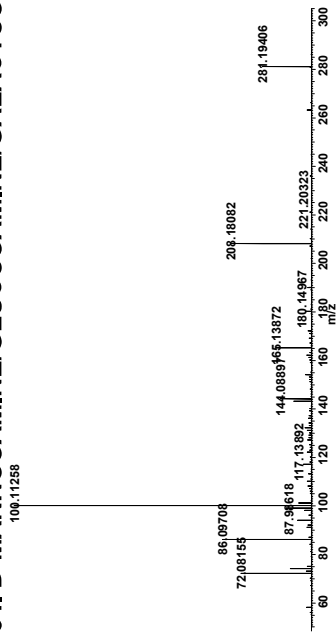

**157. 2-METHYLCITRATE**

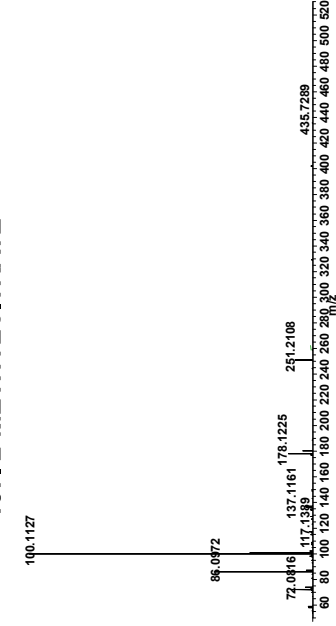

**158. SELENOMETHIONINE**

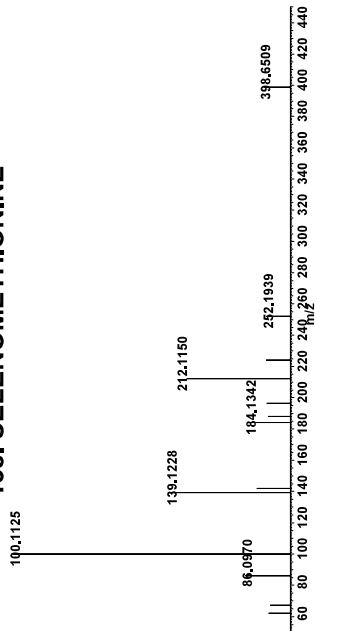

**159. 4-AMINO ACETOPHENONE/ 4-COUMARATE**

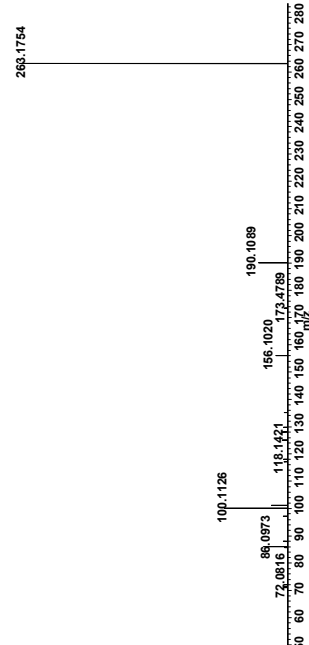

**161. N-METHYLTRYPTAMINE**

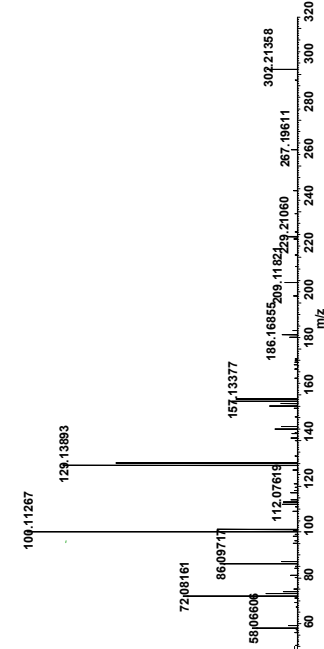

**162. CYCLOHEXANE 1,2 DIAMINE**

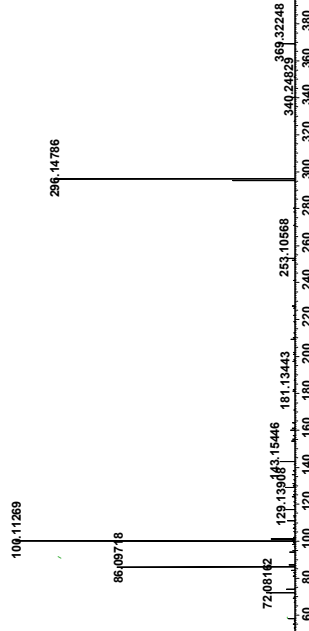

Supplementary Figure 19. MS/MS spectra for 250 derivatized metabolite standards

163. PHENETHYLAMINE

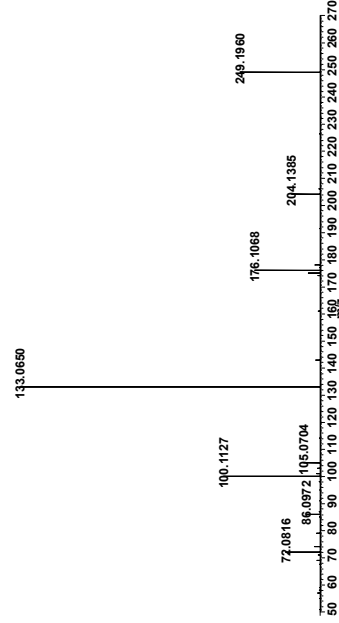

164. 3-HYDROXYANTHRANILATE

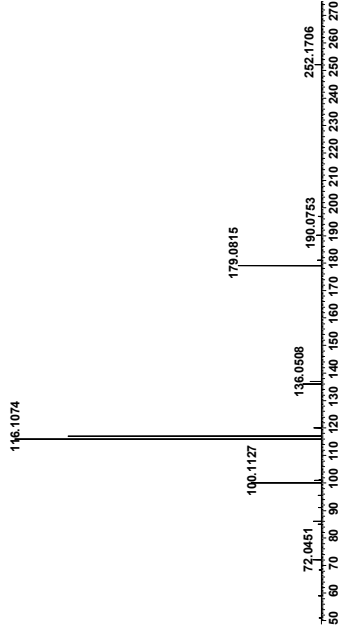

165. 3-DEHYDROSHIKIMATE

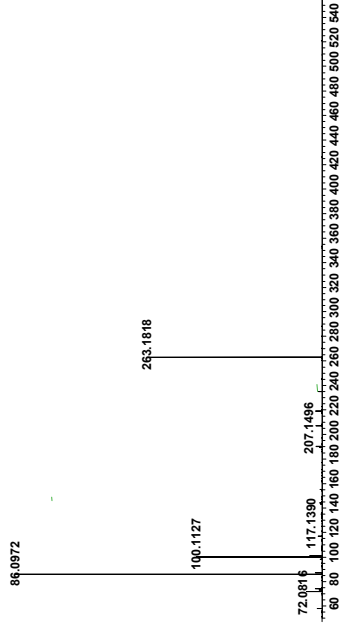

166. SEBACATE

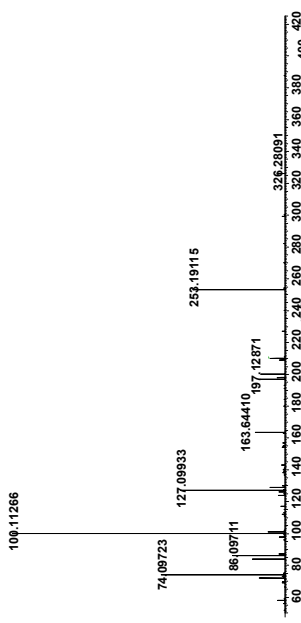

167. PIPECOLATE

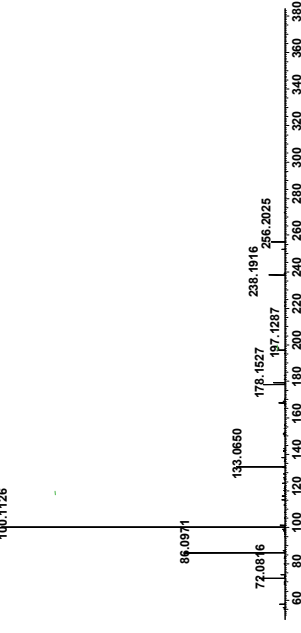

168. HEXANOATE

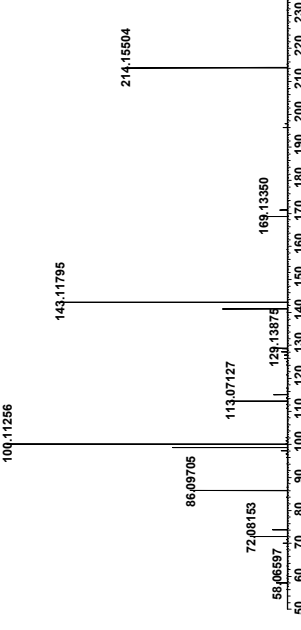

169. LEUCINE/ISOLEUCINE/NORLEUCINE

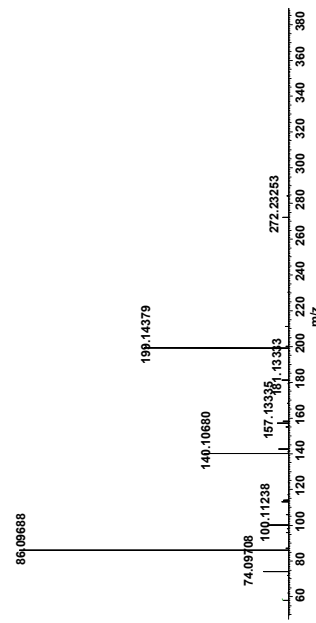

172. NORSPERMIDINE

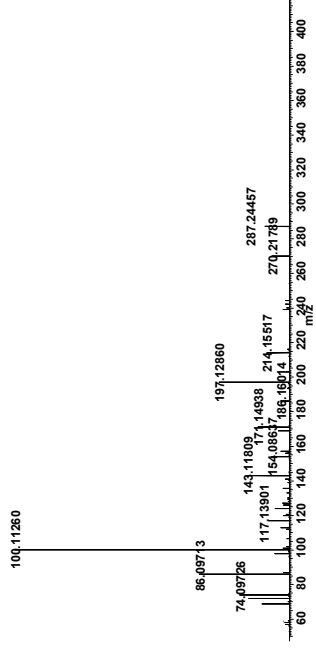

173. 10-HYDROXYDECANOATE

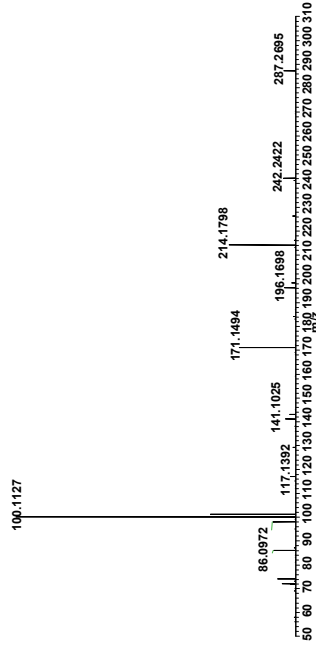

Supplementary Figure 20. MS/MS spectra for 250 derivatized metabolite standards

**174. 2,3-BUTANEDIOL**

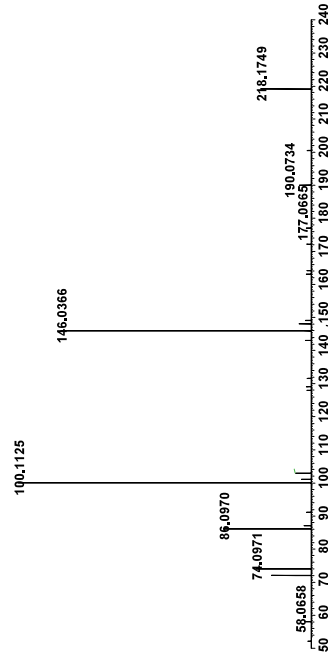

**180. TRYPTAMINE**

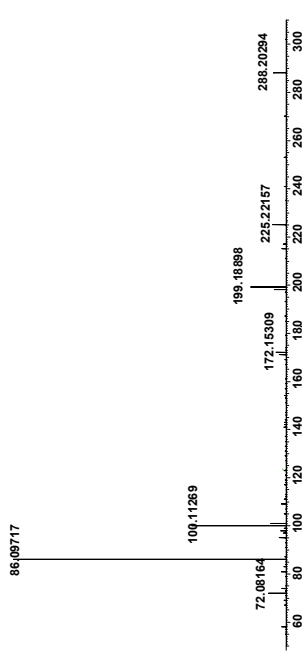

**184. CYCLOHEXANE 1,4 DIAMINE**

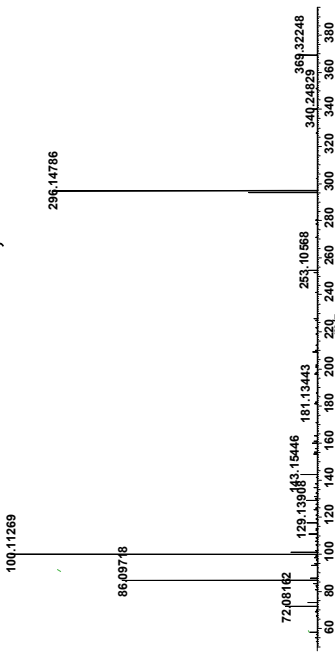

**175. 4-IMIDAZOLEACETATE**

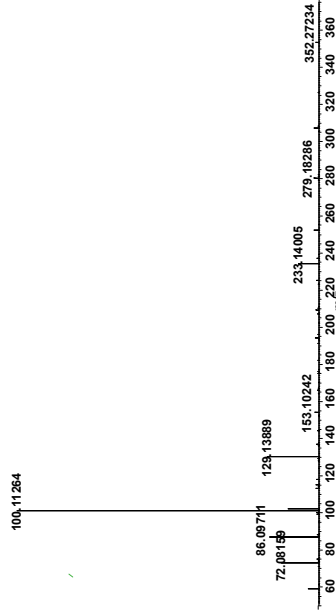

**181. 4-AMINO BENZOATE/TRIGONELLINE**

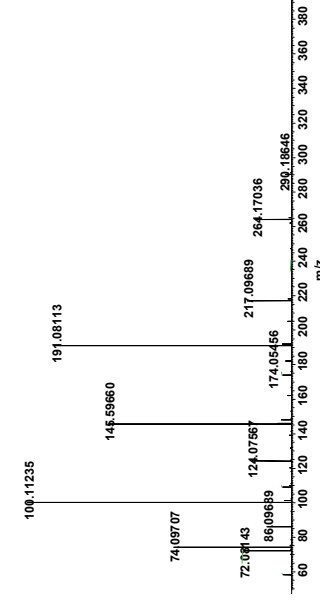

**185. 6-AMINO CAPRIC ACID/6-CARBOXYHEXANOATE**

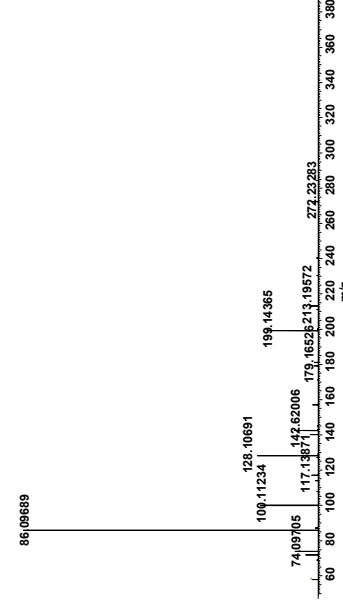

**176. 2/3/P-HYDROXYPHENYLACETATE/MANDELATE**

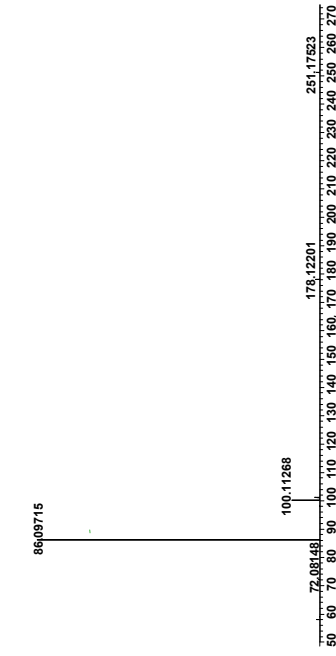

**183. TRYPTOPHAN**

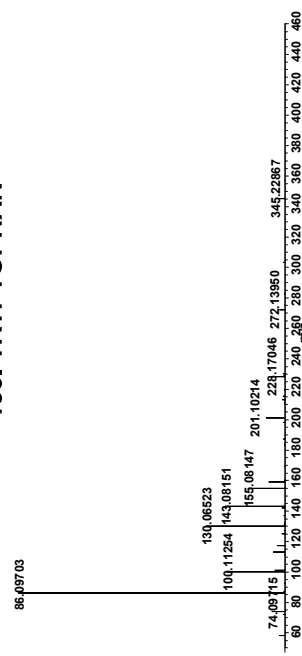

**187. 1-CYCLOHEXYLPIPERAZINE**

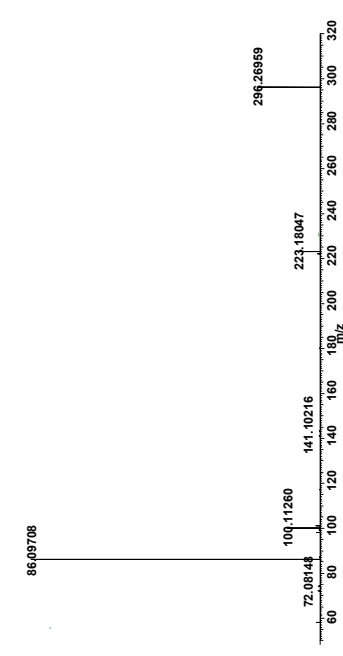

Supplementary Figure 21. MS/MS spectra for 250 derivatized metabolite standards

188. 3-SULFINOALANINE

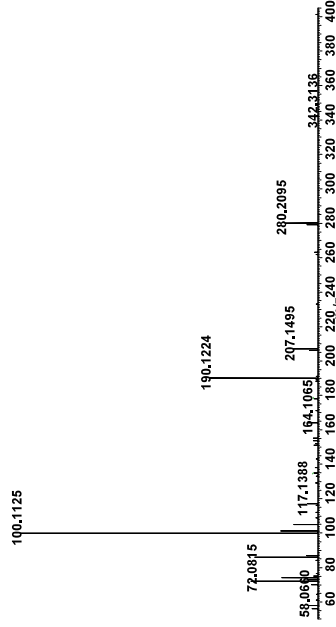

191. TRANS-CINNAMATE

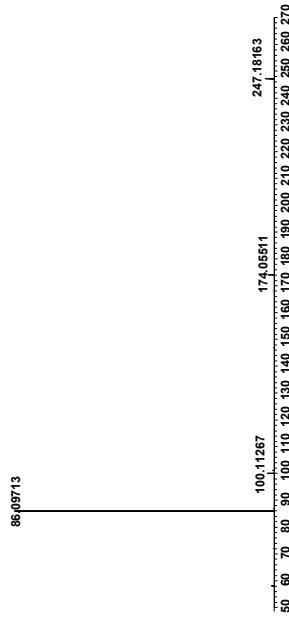

194. MONO METHYL FUMARATE

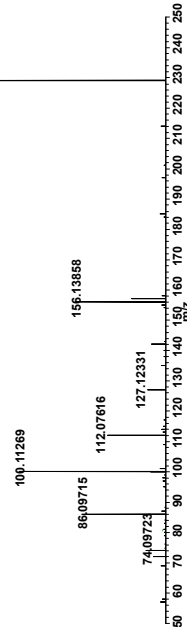

189. HYPOTAURINE

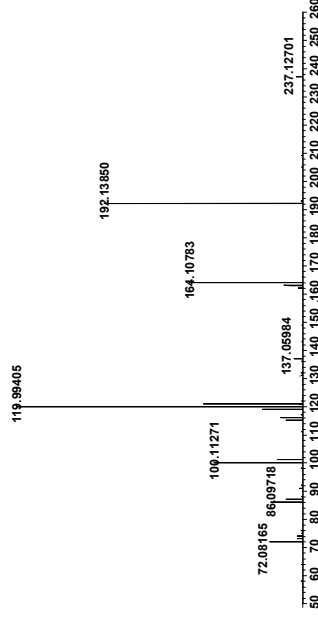

192. GLUCONATE

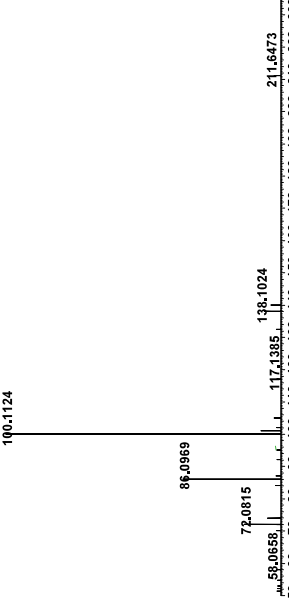

195. 4-QUINOLINECARBOXYLATE

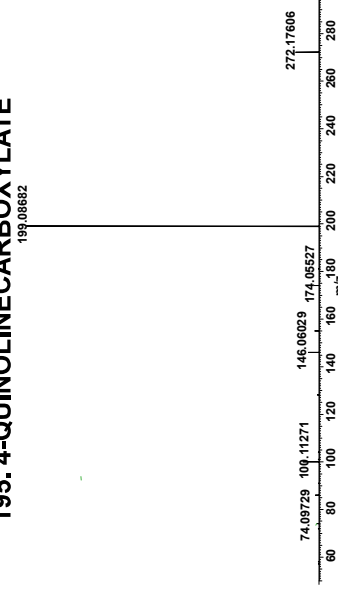

190. DOPAMINE

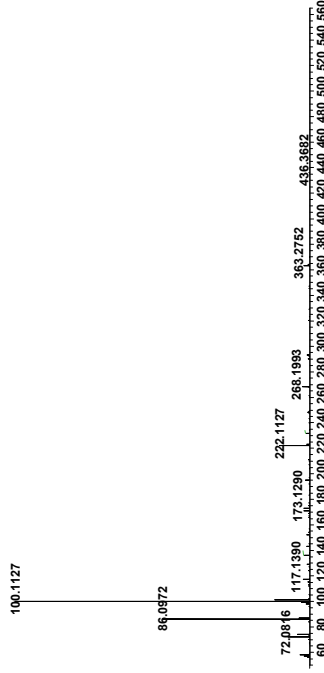

193. 1,3-BENZENEDIMETHYL AMINE

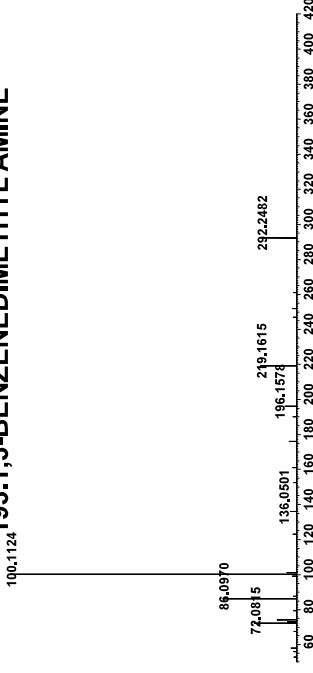

196. GUANIDINOSUCCINATE

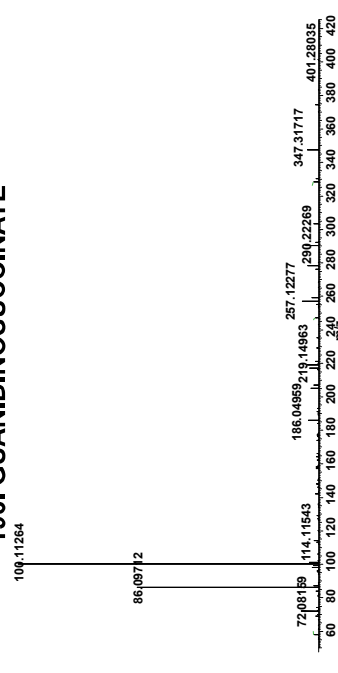

Supplementary Figure 22. MS/MS spectra for 250 derivatized metabolite standards

197. HEPTANOATE

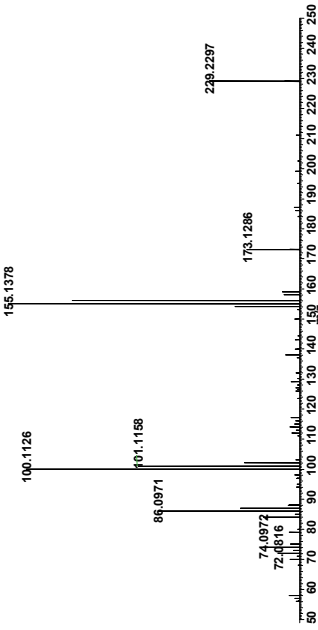

198. GLUCURONATE/GALACTURONATE

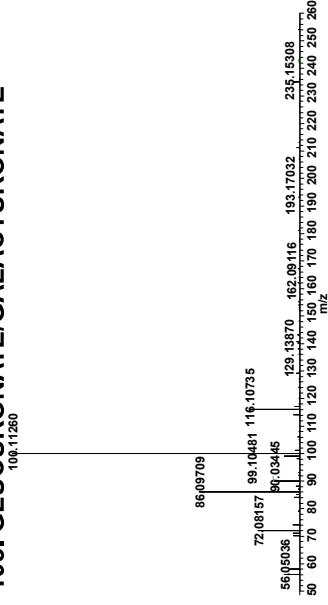

200. INDOLE-3-ETHANOL

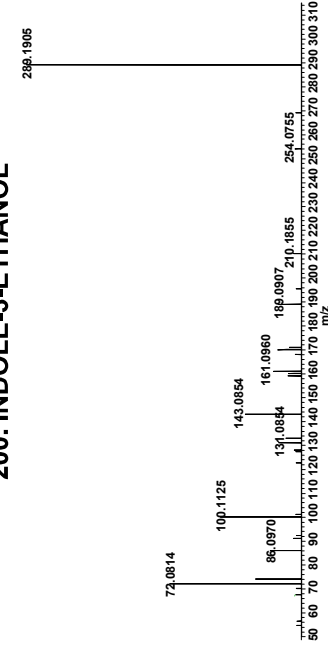

201. L-TRYPTOPHANAMIDE

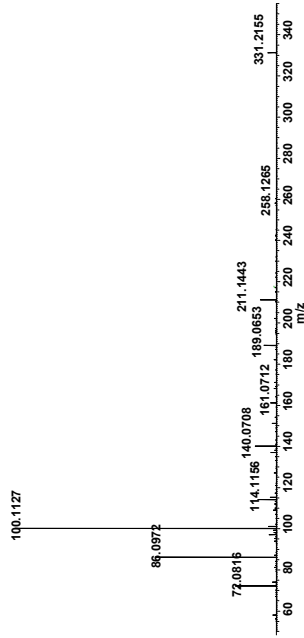

202. P-OCTOPAMINE

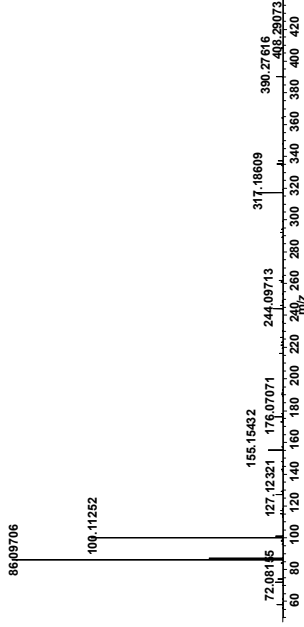

203. 4-(DIETHYLAMINO) BENZOIC ACID

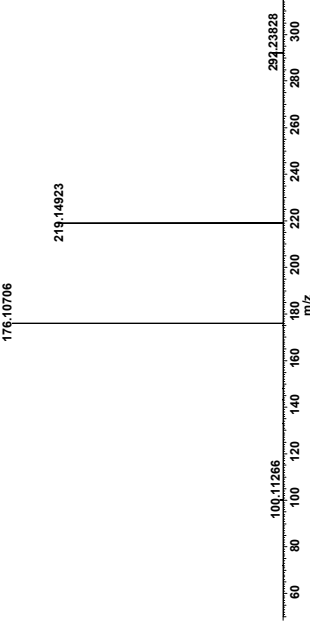

204. ETHYL 3-UREIDOPROPIONATE

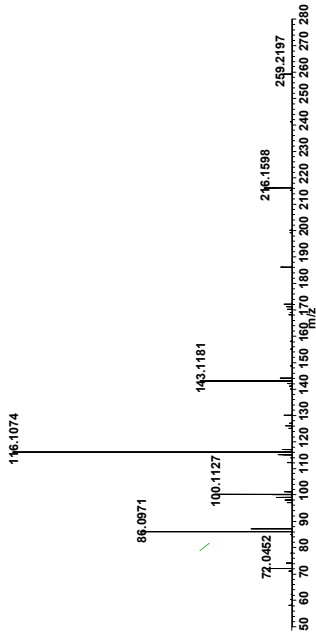

205. 5-HYDROXYINDOLEACETATE

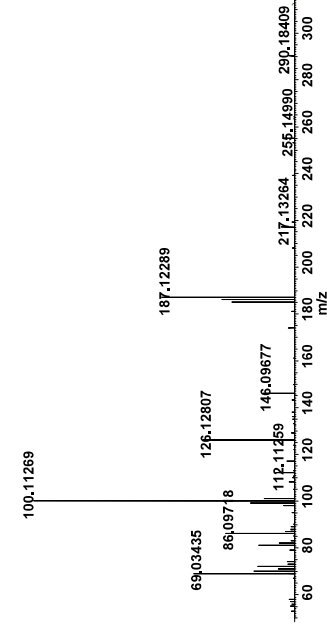

206. ANSERINE

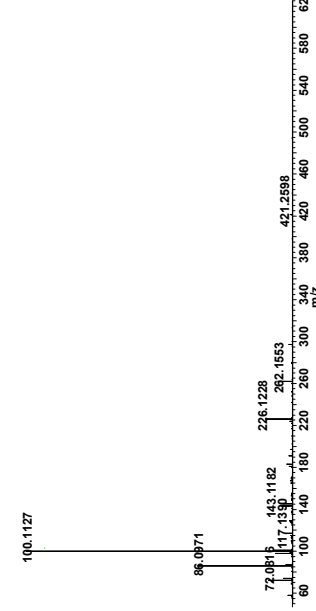

Supplementary Figure 23. MS/MS spectra for 250 derivatized metabolite standards

**207. N-ACETYLTRYPTOPHAN**

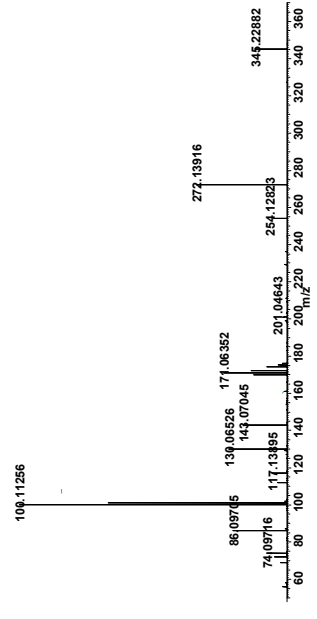

**208. 1-PHENYLETHANOL**

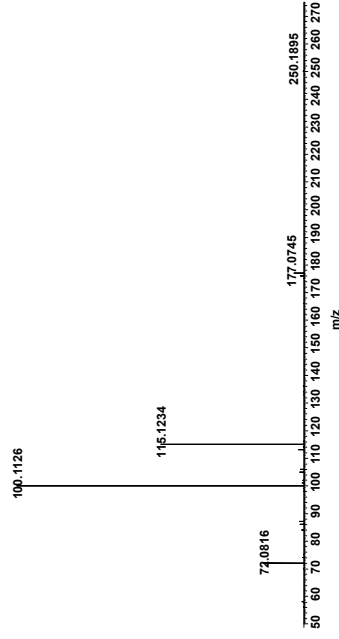

**209. METHIONINE SULFOXIMINE**

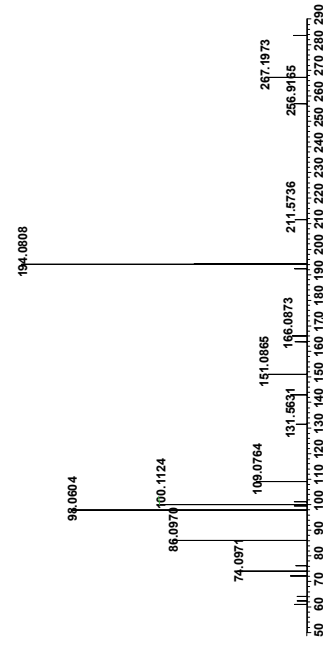

**210. 4-HYDROXY-L-PHENYLGLYCINE**

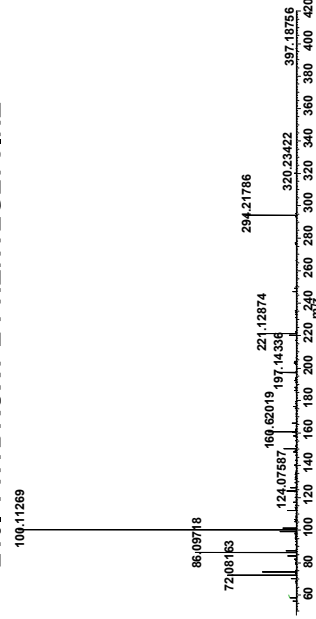

**211. LYSINE**

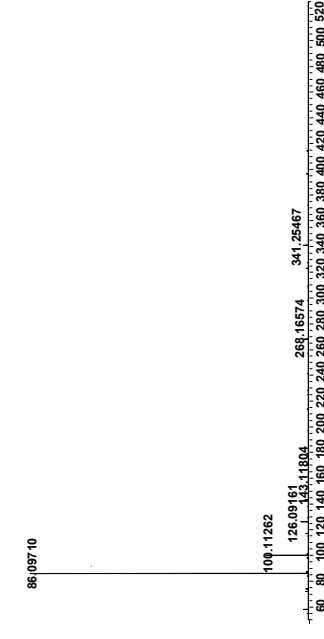

**212. CAPRYLATE**

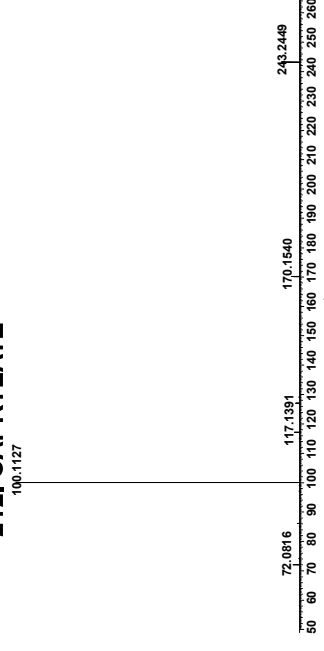

**213. AMINOADIPATE**

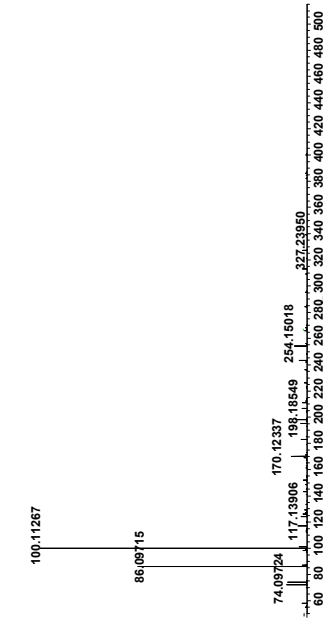

**214. O-SUCCINYL-HOMOSERINE**

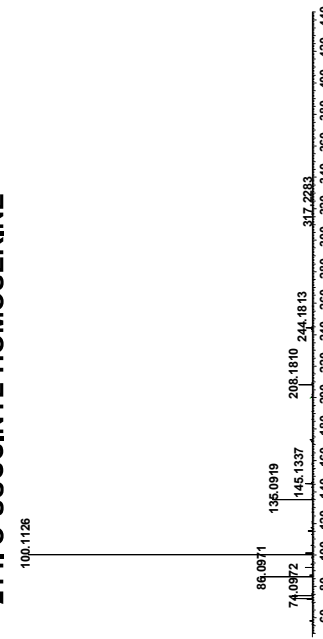

**215. 3,5-DIAMINOBENZOIC ACID**

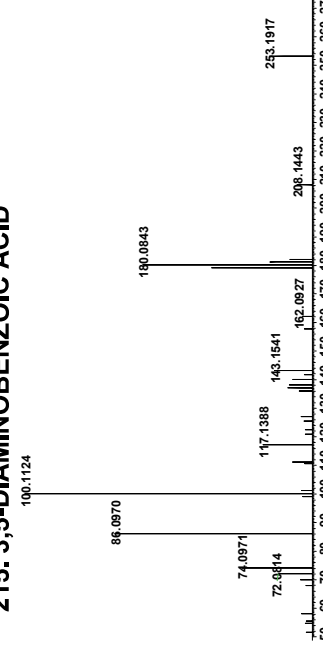



Supplementary Figure 24. MS/MS spectra for 250 derivatized metabolite standards

216. SALSOLINOL

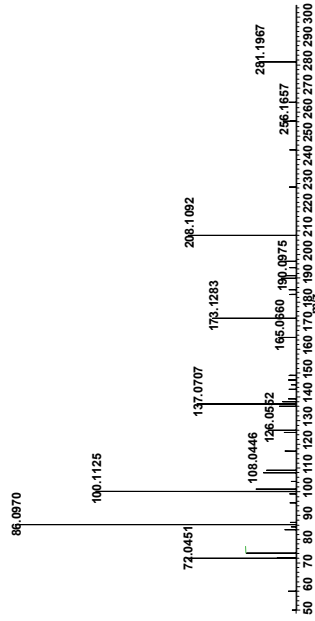

217. ITACONATE

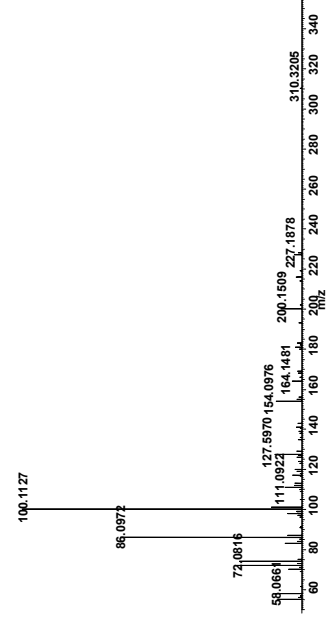

218. 3-HYDROXYMETHYLGLUTARATE

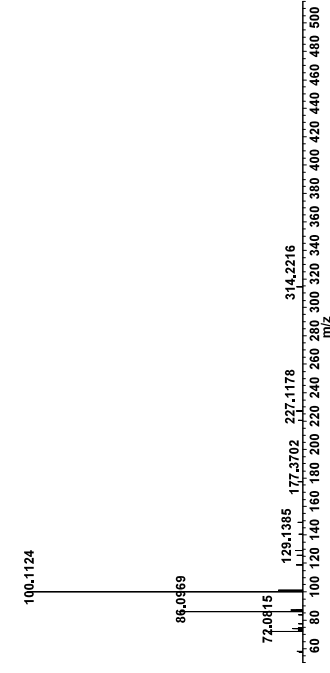

219. 1-AMINOCYCLOPROPANECARBOXYLATE

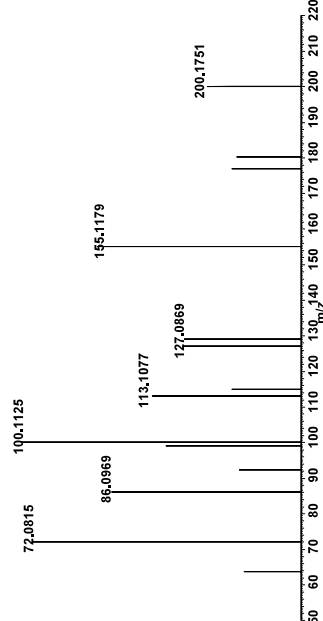

220. NONANOATE

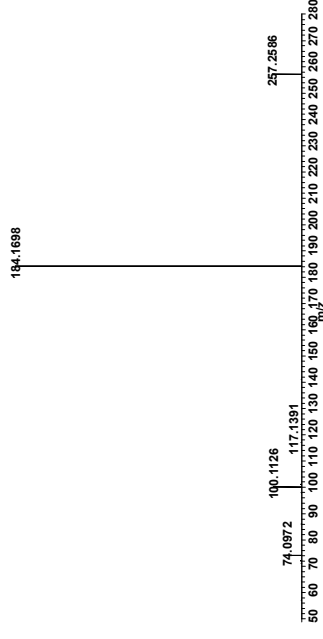

221. OXALOMALATE

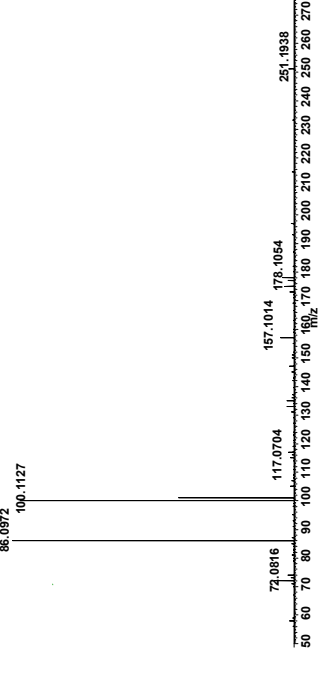

222. TRANS-4-CYCLOHEXANEDIOL

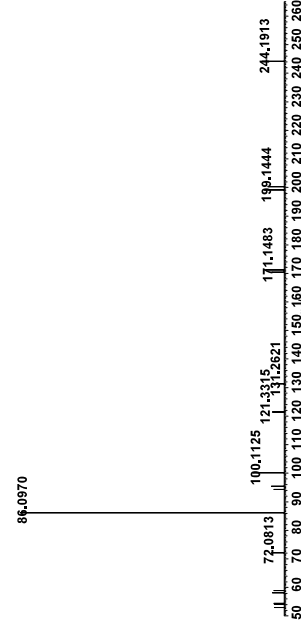

223. 3-METHYLGLUTACONATE

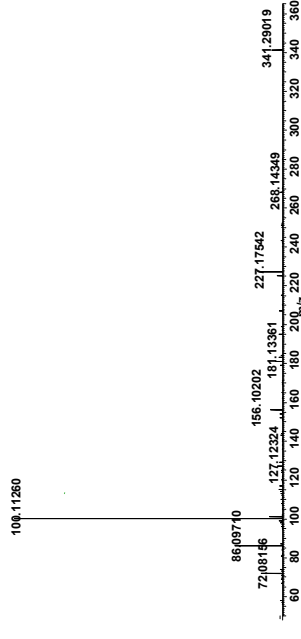

224. CITRULLINE

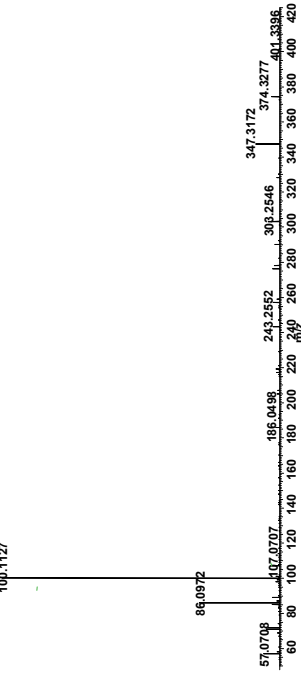

Supplementary Figure 25. MS/MS spectra for 250 derivatized metabolite standards

**225. PYROCATECHOL/HYDROQUINONE**

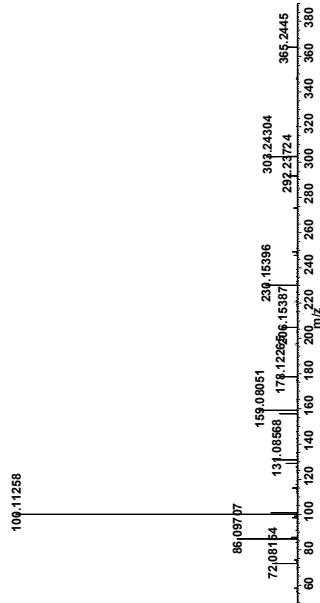

**229. BENZYLAMINE**

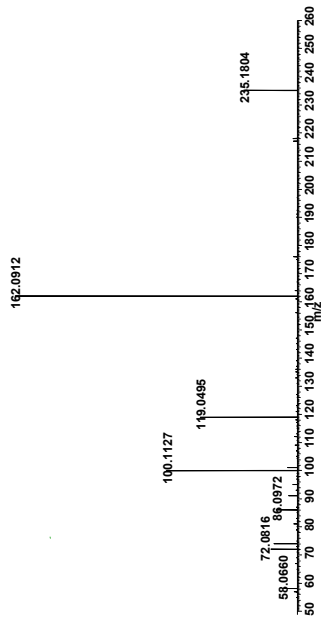

**232. DECANOATE**

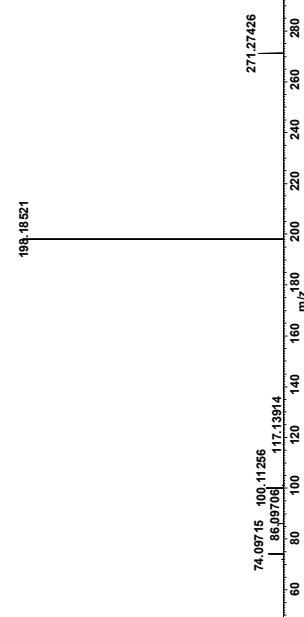

**227. PORPHOBILINOGEN**

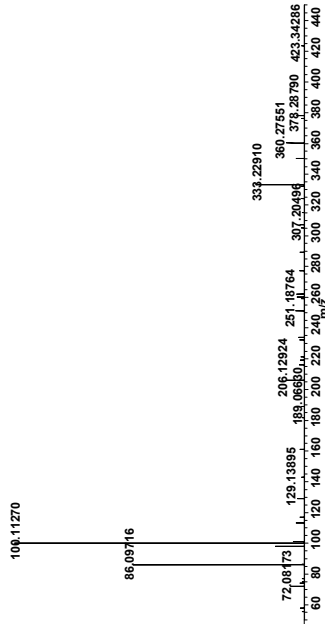

**230. ARGININE**

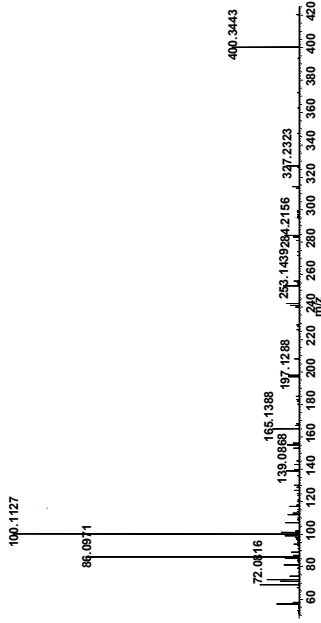

**233. DIHYDROOROTATE**

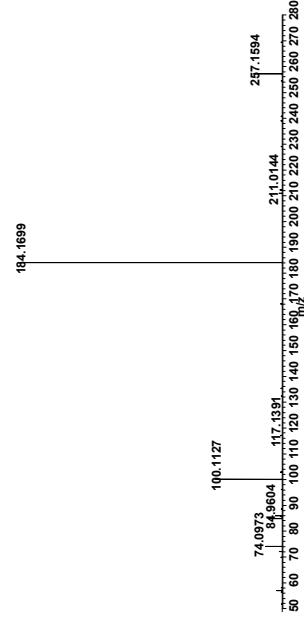

**228. PANTOLACTONE**

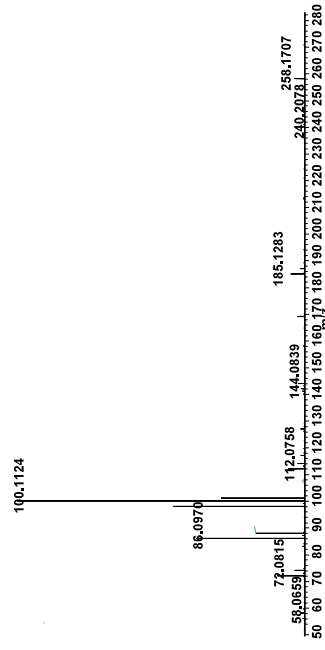

**231. OROTATE**

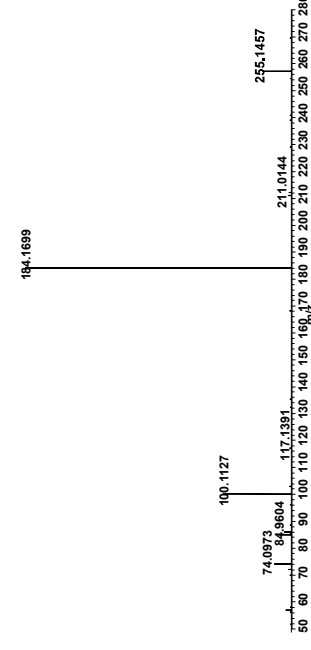

**234. DIAMINOPIMELATE**

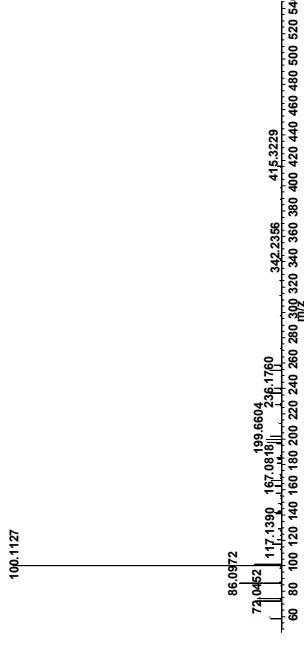

Supplementary Figure 26. MS/MS spectra for 250 derivatized metabolite standards

**235. ASPARTATE**

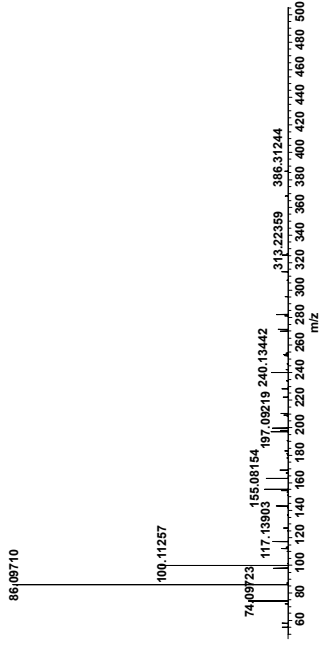

**238. SPERMINE**

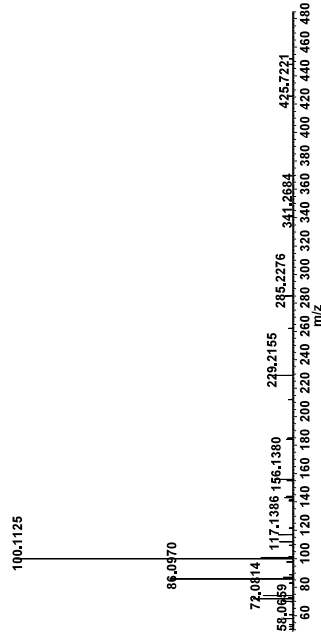

**236. D-ORNITHINE**

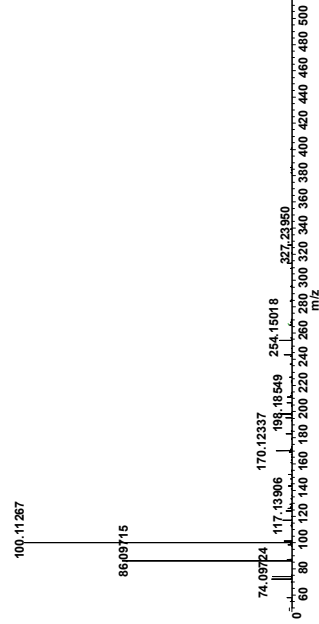

**239. N1-ACETYLSPERMINE**

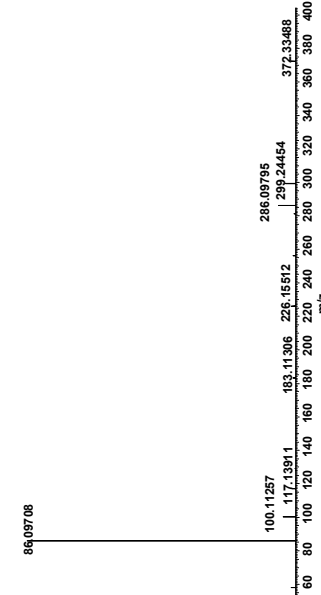

**241. N-METHYLASPARTATE**

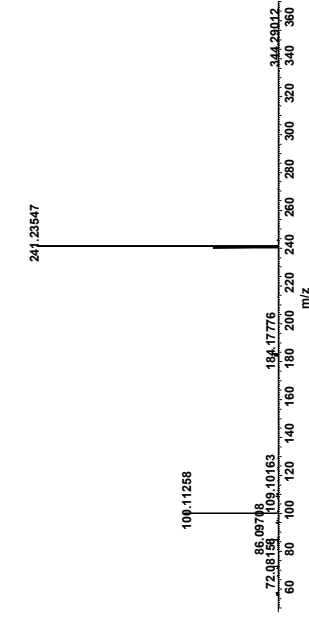

**242. MALEAMATE**

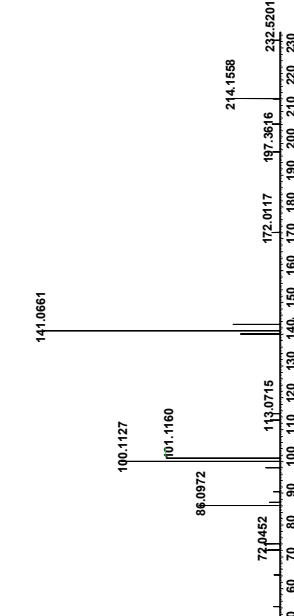

**237. GLUTAMATE**

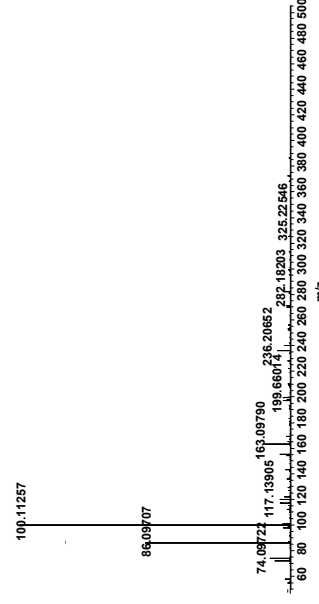

**240. 4-PYRIDOXATE**

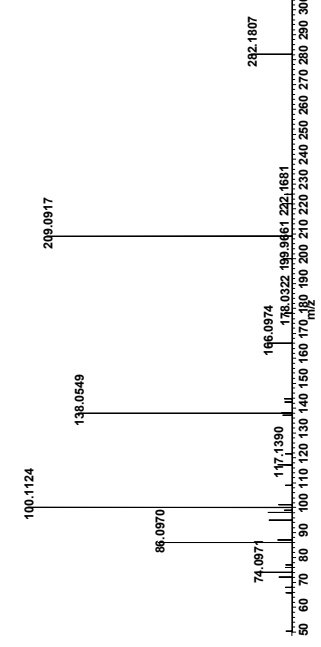

**243. 4/3-HYDROXYBENZOATE/ SALICYLATE**

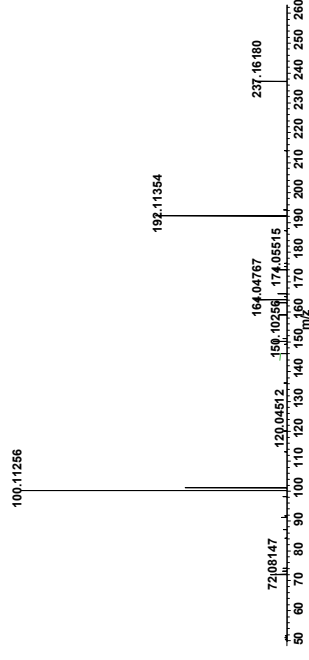

Supplementary Figure 27. MS/MS spectra for 250 derivatized metabolite standards

246. LAUROYL-CARNITINE

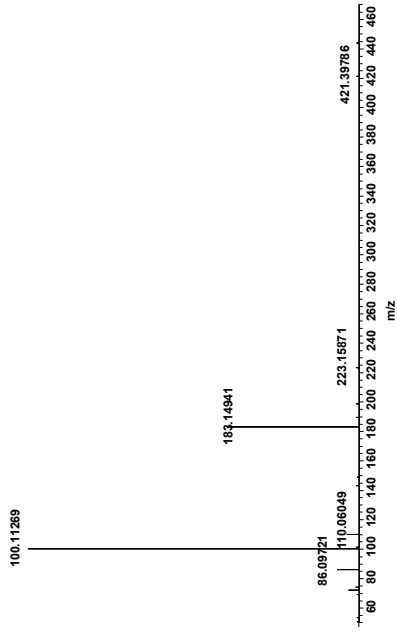

247. LAURATE

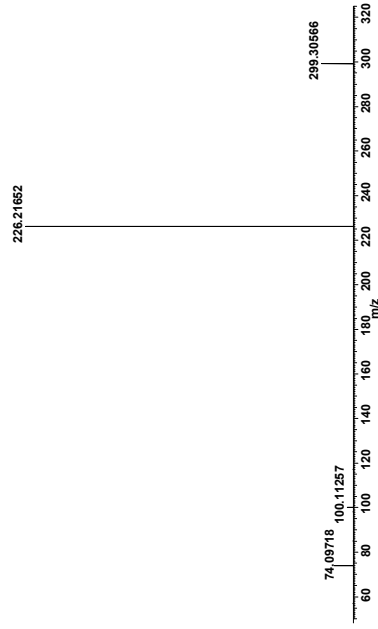

248. DODECYLAMINE

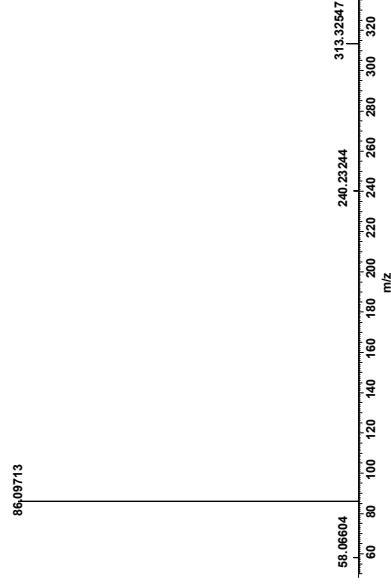

249. TYRAMINE

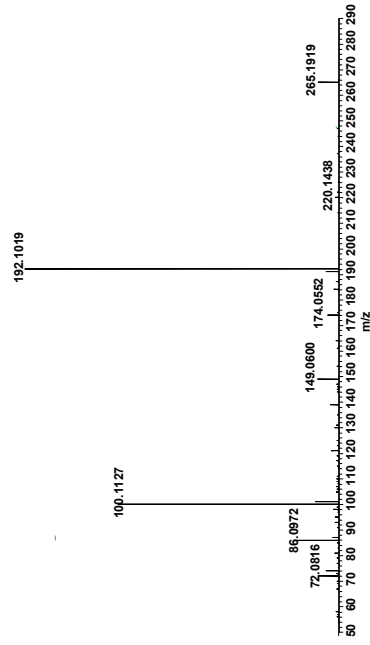

250. TETRADECYLAMINE

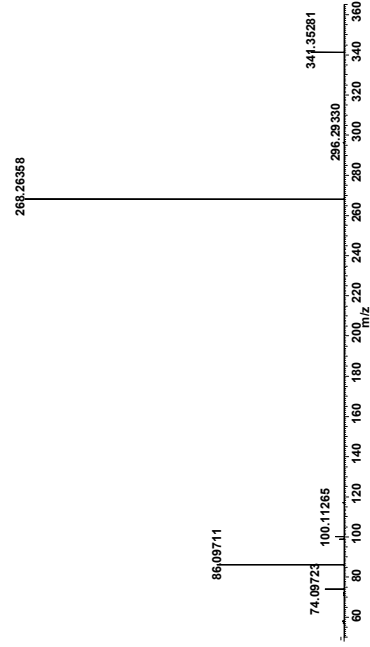











|         |                                                     |       |       |      |           |       |       |      |           |       |       |       |            |            |    |
|---------|-----------------------------------------------------|-------|-------|------|-----------|-------|-------|------|-----------|-------|-------|-------|------------|------------|----|
| 191     | TRANS-CHINAMATE                                     | ND    | ND    | ND   | ND        | ND    | ND    | ND   | ND        | ND    | ND    | ND    | ND         | ND         |    |
| 192     | GLUCONATE                                           | ND    | ND    | ND   | ND        | ND    | ND    | ND   | ND        | ND    | ND    | ND    | ND         | ND         |    |
| 193     | 1,3-BENZENE-DIMETHYLAMINE                           | ND    | ND    | ND   | ND        | ND    | ND    | ND   | ND        | ND    | 12.96 | 3.93  | 0.27       | 30000e390  |    |
| 194     | MONO-METHYL-FUMARATE                                | ND    | ND    | ND   | ND        | ND    | ND    | ND   | ND        | ND    | 13    | 4.37  | 0.19       | 20000e390  |    |
| 195     | 4-CYCLOHEXENECARBOXYLATE                            | 12.84 | 0.18  | 0.18 | 2000e170  | ND    | ND    | ND   | ND        | ND    | 12.28 | 2.83  | 0.27       | 40000e450  |    |
| 196     | GLUANIBENZOICACONATE                                | ND    | ND    | ND   | ND        | 12.63 | 14.68 | 0.13 | 1000e110  | ND    | ND    | ND    | ND         | ND         |    |
| 197     | HEPTANOATE                                          | ND    | ND    | ND   | ND        | 12.68 | 11.97 | 0.14 | 2000e220  | 13.24 | 7.26  | 0.19  | 14000e450  | ND         |    |
| 198     | GALACTURONATE                                       | 12.58 | 0.21  | 0.21 | 8500e330  | 13.12 | 10.88 | 0.09 | 4000e370  | 13.45 | 2.77  | 0.19  | 8500e460   | ND         |    |
| 199     | GLUCURONATE                                         | 12.56 | 0.21  | 0.21 | 8500e330  | 13.12 | 10.88 | 0.09 | 4000e370  | 13.45 | 2.77  | 0.19  | 8500e460   | ND         |    |
| 200     | INDOLE-3-ETHANOL                                    | ND    | ND    | ND   | ND        | ND    | ND    | ND   | ND        | ND    | 12.16 | 2.82  | 0.08       | 16000e1000 |    |
| 201     | 1,3-BIS(3-TRIFLUOROMETHYLPHENYL)PROPANE             | 12.62 | 0.20  | 0.20 | 2300e170  | 13.04 | 8.95  | 0.19 | 1700e210  | 14.26 | 20.73 | 0.41  | 14500e270  | ND         |    |
| 202     | PROPYLAMINE                                         | ND    | ND    | ND   | ND        | ND    | ND    | ND   | ND        | ND    | ND    | ND    | ND         | ND         |    |
| 203     | 4-(BIS(3-TRIFLUOROMETHYLPHENYL)AMINO)BENZENOIC ACID | ND    | ND    | ND   | ND        | ND    | ND    | ND   | ND        | ND    | ND    | ND    | ND         | ND         |    |
| 204     | ETHYL 3-O-BETA-D-GALACTOPYRANOSYLATE                | ND    | ND    | ND   | ND        | ND    | ND    | ND   | ND        | ND    | ND    | ND    | ND         | ND         |    |
| 205     | 5-HYDROXYINDOLE-3-PYRUVATE                          | ND    | ND    | ND   | ND        | ND    | ND    | ND   | ND        | ND    | 12.71 | 4.35  | 0.21       | 7200e450   |    |
| 206     | ASORBATE                                            | ND    | ND    | ND   | ND        | 11.34 | 22.25 | 0.10 | 9000e330  | ND    | ND    | ND    | ND         | ND         |    |
| 207     | INACETYLTRYPTOPHAN                                  | 10.85 | 0.95  | 0.91 | 1700e24   | 12.41 | 11.91 | 0.11 | 1900e250  | 14.76 | 20.58 | 0.25  | 16000e470  | ND         |    |
| 208     | 1-PHENYLETHANOL                                     | ND    | ND    | ND   | ND        | ND    | ND    | ND   | ND        | ND    | 13.77 | 7.43  | 0.31       | 8500e1400  |    |
| 209     | METHYLENE-BIS(SOXIMINE)                             | ND    | ND    | ND   | ND        | ND    | ND    | ND   | ND        | ND    | ND    | ND    | ND         | ND         |    |
| 210     | 4-HYDROXY-2-PHENYLGLYCINE                           | ND    | ND    | ND   | ND        | 13.84 | 16.41 | 0.09 | 11000e110 | 14.49 | 32.31 | 0.31  | 12000e1100 | ND         |    |
| 211     | LYSINE                                              | 12.73 | 0.41  | 0.10 | 1000e200  | 17.19 | 14.11 | 0.23 | 300e15    | 1.16  | 5.68  | 0.09  | 4400e270   | ND         |    |
| 212     | CAPRYLATE                                           | 13.19 | 7.92  | 0.09 | 9000e120  | 13.62 | 18.32 | 0.20 | 3100e170  | 14.22 | 1.18  | 0.50  | 24000e360  | ND         |    |
| 213     | AMINOACETATE                                        | 12.73 | 0.38  | 0.03 | 11000e400 | ND    | ND    | ND   | ND        | ND    | ND    | ND    | ND         | ND         |    |
| 214     | OSHOIC(11)-HOMOSERINATE                             | ND    | ND    | ND   | ND        | ND    | ND    | ND   | ND        | ND    | ND    | ND    | ND         | ND         |    |
| 215     | 3,5-DIAMINOBENZENOIC ACID                           | ND    | ND    | ND   | ND        | ND    | ND    | ND   | ND        | ND    | ND    | ND    | ND         | ND         |    |
| 216     | SALICINOL                                           | ND    | ND    | ND   | ND        | 15.58 | 7.64  | 0.08 | 5000e310  | ND    | ND    | ND    | ND         | ND         |    |
| 217     | ITACONATE                                           | ND    | ND    | ND   | ND        | ND    | ND    | ND   | ND        | ND    | 13.05 | 7.14  | 0.27       | 8800e450   |    |
| 218     | 4-HYDROXYMETHYLSULFARATE                            | ND    | ND    | ND   | ND        | ND    | ND    | ND   | ND        | ND    | ND    | ND    | ND         | ND         |    |
| 219     | 1,4-BIS(3-CYCLOHEXYLANE)CARBOXYLATE                 | ND    | ND    | ND   | ND        | ND    | ND    | ND   | ND        | ND    | ND    | ND    | ND         | ND         |    |
| 220     | INDANONATE                                          | 14.14 | 5.57  | 0.12 | 1100e170  | 14.71 | 7.98  | 0.08 | 1500e270  | 16.23 | 5.80  | 0.24  | 1200e350   | ND         |    |
| 221     | ORACONATE                                           | ND    | ND    | ND   | ND        | ND    | ND    | ND   | ND        | ND    | ND    | ND    | ND         | ND         |    |
| 222     | TRANS-3-CYCLOHEXANEDIOL                             | ND    | ND    | ND   | ND        | ND    | ND    | ND   | ND        | ND    | ND    | ND    | ND         | ND         |    |
| 223     | 3-METHYLGLUTAMONATE                                 | 14.13 | 19.58 | 0.08 | 2100e170  | ND    | ND    | ND   | ND        | ND    | 13.38 | 5.81  | 0.35       | 36000e460  |    |
| 224     | GIBBERULINE                                         | 14.52 | 7.50  | 0.41 | 8500e300  | ND    | ND    | ND   | ND        | ND    | ND    | ND    | ND         | ND         |    |
| 225     | HYDROXYMINE                                         | ND    | ND    | ND   | ND        | ND    | ND    | ND   | ND        | ND    | ND    | ND    | ND         | ND         |    |
| 226     | PROCATENOL                                          | ND    | ND    | ND   | ND        | ND    | ND    | ND   | ND        | ND    | ND    | ND    | ND         | ND         |    |
| 227     | PORPHORBILINOGEN                                    | ND    | ND    | ND   | ND        | ND    | ND    | ND   | ND        | ND    | ND    | ND    | ND         | ND         |    |
| 228     | PROTOLACTONE                                        | ND    | ND    | ND   | ND        | ND    | ND    | ND   | ND        | ND    | ND    | ND    | ND         | ND         |    |
| 229     | BENZYLAMINE                                         | ND    | ND    | ND   | ND        | ND    | ND    | ND   | ND        | ND    | 13.4  | 17.84 | 0.18       | 71000e340  |    |
| 230     | ACRIBINE                                            | 12.74 | 7.40  | 0.07 | 3800e190  | ND    | ND    | ND   | ND        | ND    | 14.1  | 18.76 | 0.28       | 10000e270  |    |
| 231     | GRODATE                                             | ND    | ND    | ND   | ND        | ND    | ND    | ND   | ND        | ND    | ND    | ND    | ND         | ND         |    |
| 232     | DECANOATE                                           | 15.08 | 24.34 | 0.08 | 1000e48   | 15.56 | 22.24 | 0.03 | 2800e190  | 16.24 | 0.85  | 0.26  | 13000e1100 | ND         |    |
| 233     | DIHYDROPROTATE                                      | ND    | ND    | ND   | ND        | ND    | ND    | ND   | ND        | ND    | ND    | ND    | ND         | ND         |    |
| 234     | DIBENZOPIRONE                                       | ND    | ND    | ND   | ND        | ND    | ND    | ND   | ND        | ND    | ND    | ND    | ND         | ND         |    |
| 235     | ASPARTATE                                           | 12.74 | 13.49 | 0.15 | 8700e110  | 17.16 | 17.35 | 0.08 | 3500e490  | 14.27 | 5.49  | 0.21  | 34000e460  | ND         |    |
| 236     | D-CYTHINE                                           | 12.73 | 5.24  | 0.20 | 1100e490  | 17.16 | 12.80 | 0.18 | 3000e110  | ND    | ND    | ND    | ND         | ND         |    |
| 237     | GLUTAMATE                                           | 12.73 | 8.21  | 0.10 | 1100e140  | 17.13 | 4.09  | 0.07 | 2000e160  | 13.89 | 11.49 | 0.29  | 11000e1100 | ND         |    |
| 238     | PROBIDE                                             | 12.73 | 7.66  | 0.10 | 1000e250  | 17.15 | 12.83 | 0.08 | 1500e110  | ND    | ND    | ND    | ND         | ND         |    |
| 239     | N-ACETYLSPERMINE                                    | 12.74 | 9.07  | 0.03 | 8500e300  | 12.61 | 8.93  | 0.08 | 1600e200  | ND    | ND    | ND    | ND         | ND         |    |
| 240     | 4-PROPYLATE                                         | 9.52  | 21.40 | 0.27 | 9000e200  | 13.29 | 3.84  | 0.09 | 8100e300  | ND    | ND    | ND    | ND         | ND         |    |
| 241     | 3-METHYLASPARTATE                                   | ND    | ND    | ND   | ND        | ND    | ND    | ND   | ND        | ND    | ND    | ND    | ND         | ND         |    |
| 242     | MALEAMATE                                           | ND    | ND    | ND   | ND        | ND    | ND    | ND   | ND        | ND    | ND    | ND    | ND         | ND         |    |
| 243     | 4-HYDROXYBENZONATE                                  | ND    | ND    | ND   | ND        | ND    | ND    | ND   | ND        | ND    | ND    | ND    | ND         | ND         |    |
| 244     | SALICYLATE                                          | ND    | ND    | ND   | ND        | ND    | ND    | ND   | ND        | ND    | ND    | ND    | ND         | ND         |    |
| 245     | 5-HYDROXYBENZONATE                                  | ND    | ND    | ND   | ND        | ND    | ND    | ND   | ND        | ND    | ND    | ND    | ND         | ND         |    |
| 246     | LAURYL-CARBITINE                                    | ND    | ND    | ND   | ND        | ND    | ND    | ND   | ND        | ND    | ND    | ND    | ND         | ND         |    |
| 247     | LAURATE                                             | ND    | ND    | ND   | ND        | 24.36 | 17.81 | 0.05 | 2900e440  | 14.43 | 6.84  | 0.24  | 41000e500  | ND         |    |
| 248     | DOCECYLAMINE                                        | ND    | ND    | ND   | ND        | ND    | ND    | ND   | ND        | ND    | 20    | 4.42  | 0.65       | 17000e260  | ND |
| 249     | TRIAMINE                                            | ND    | ND    | ND   | ND        | ND    | ND    | ND   | ND        | ND    | ND    | ND    | ND         | ND         |    |
| 250     | TETRADECYLAMINE                                     | ND    | ND    | ND   | ND        | ND    | ND    | ND   | ND        | ND    | 26.05 | 14.16 | 0.33       | 30000e160  | ND |
| Average |                                                     |       | 11.27 | 0.79 | 2300e420  |       | 13.82 | 0.35 | 9300e530  |       | 7.76  | 0.30  | 24000e1100 |            |    |

Supplementary Table 4. Comparison of Peak width at half height (second) for capLC-ESI-MS and CE-ESI-MS

| #  | Analyte       | capLC-ESI-MS | CE-ESI-MS <sup>TM</sup> | Fold change |
|----|---------------|--------------|-------------------------|-------------|
| 1  | GLYCINE       | 4.2          | 6.4                     | 1.53        |
| 2  | ALANINE       | 4.2          | 6                       | 2.14        |
| 3  | PYRUVATE      | 5.6          | 7.8                     | 1.38        |
| 4  | OXOSULFURATE  | 5.4          | 6.4                     | 1.56        |
| 5  | MALATE        | 10.4         | 12                      | 1.15        |
| 6  | SERINE        | 10.4         | 12                      | 1.15        |
| 7  | GLUTAMINE     | 4.6          | 6.4                     | 1.83        |
| 8  | THREONINE     | 4.2          | 6                       | 2.14        |
| 9  | SUCONATE      | 3.8          | 7.8                     | 2.17        |
| 10 | LACTATE       | 9            | 6.4                     | 0.83        |
| 11 | TYROSINE      | 5.4          | 6                       | 1.67        |
| 12 | VALINE        | 6            | 7.8                     | 1.30        |
| 13 | FUMARATE      | 4.8          | 6.4                     | 1.75        |
| 14 | LEUCINE       | 6            | 6                       | 1.00        |
| 15 | ISOLEUCINE    | 6            | 6                       | 1.00        |
| 16 | TRYPTOPHAN    | 5.4          | 6.4                     | 1.56        |
| 17 | LYSINE        | 5.4          | 11.4                    | 2.11        |
| 18 | ASPARTATE     | 5.4          | 11.4                    | 2.11        |
| 19 | GLUTAMATE     | 5.4          | 11.4                    | 2.11        |
| 20 | ASORINE       | 10.8         | 6                       | 0.83        |
| 21 | ASPARAGINE    | 7.8          | 6.4                     | 1.08        |
| 22 | GLUTAMINE     | 4.8          | 6                       | 1.88        |
| 23 | PHENYLALANINE | 5.4          | 6                       | 1.67        |
| 24 | METHIONINE    | 5.4          | 7.8                     | 1.44        |
| 25 | PROLINE       | 9.37         | 18                      | 1.96        |

133 Huang, T.; Ambruster, M.; Lee, R.; Wu, D. S.; Edwards, J. L. Metabolic analysis of mammalian cells and human tissue through one-pot two-stage derivatizations using a heartless capillary electrophoresis-electrospray ionization-mass spectrometry. *J. Chromatogr. A* 2018, 1587, 219-225.
